# Supplementary material
Source: HighWire-hosted journal article supplement (https://svn.bmj.com/content/svn-2023-002665)
Supplement: inline-supplementary-material-1 [file inline-supplementary-material-1.pdf]

## Supplementary Materials

|                                                                                                                               |    |
|-------------------------------------------------------------------------------------------------------------------------------|----|
| Supplementary Materials 1 – Study Design and Missing Covariates.....                                                          | 3  |
| SM Figure 1 Study workflow.....                                                                                               | 3  |
| SM Table 1.1 Detailed Information on Missing Covariates.....                                                                  | 4  |
| Supplementary Materials 2 – Prevalence rates.....                                                                             | 5  |
| SM Table 2.1 Prevalence Rate of Cardiovascular Disease.....                                                                   | 5  |
| Supplementary Materials 3 – Analysis of Framingham General Cardiovascular Risk Score.....                                     | 8  |
| SM Table 3.1 Proportional Hazards Ratio of Multi-Adjusted Model of Framingham General Cardiovascular Risk Score Analysis..... | 8  |
| Supplementary Materials 4 – Analysis of All Types of Dementia.....                                                            | 9  |
| SM Table 4.1 Minimal-Adjusted Cox Regression Model of the Association Between Cardiovascular Diseases and Dementia.....       | 9  |
| SM Table 4.2 Multi-Adjusted Cox Regression Model of the Association Between Cardiovascular Diseases and Dementia.....         | 11 |
| SM Table 4.3 Proportional Hazards Ratio of Multi-Adjusted Cox Regression Model.....                                           | 14 |
| Supplementary Materials 5 - Sensitivity Analysis: Age-Restricted Models.....                                                  | 18 |
| SM Table 5.1 Association Between Cardiovascular Diseases and All-Cause Dementia in Age-Restricted Model.....                  | 18 |
| SM Table 5.2 Association Between Cardiovascular Diseases and Alzheimer’s Disease in Age-Restricted Model.....                 | 19 |
| SM Table 5.3 Association Between Cardiovascular Diseases and Vascular dementia in Age-Restricted Model.....                   | 21 |
| Supplementary Materials 6 – Sensitivity Analysis: Sex-Restricted Models.....                                                  | 23 |
| SM Table 6.1 Association Between Cardiovascular Diseases and All-Cause Dementia in Sex-Restricted Model.....                  | 23 |
| SM Table 6.2 Association Between Cardiovascular Diseases and Alzheimer’s Disease in Sex-Restricted Model.....                 | 24 |
| SM Table 6.3 Association Between Cardiovascular Diseases and Vascular Dementia in Sex-Restricted Model.....                   | 26 |
| Supplementary Materials 7 - Sensitivity analysis: Follow-up-Restricted Model.....                                             | 28 |
| SM Table 7.1 Association Between Cardiovascular Diseases and All-cause Dementia in Follow-up-Restricted Model.....            | 28 |
| SM Table 7.2 Association Between Cardiovascular Diseases and Alzheimer’s disease in Follow-up Restricted Model.....           | 29 |
| SM Table 7.3 Association Between Cardiovascular Diseases and Vascular Dementia in Follow-up Restricted Model.....             | 31 |
| Supplementary Materials 8 - Fine-Gray Models.....                                                                             | 33 |
| SM Table 8.1 Association of Cardiovascular Diseases and All-cause Dementia in Fine-Gray Model.....                            | 33 |
| SM Table 8.2 Association of Cardiovascular Diseases and Alzheimer's Disease in Fine-Gray Model.....                           | 35 |
| SM Table 8.3 Association of Cardiovascular Diseases and Vascular Dementia in Fine-Gray Model.....                             | 36 |

|                                                                                                                 |    |
|-----------------------------------------------------------------------------------------------------------------|----|
| Supplementary Materials 9 – Analysis of Post-Stroke Dementia .....                                              | 39 |
| SM Table 9.1 Cox Regression Model of Association Between Cardiovascular Diseases and Post-Stroke Dementia ..... | 39 |
| <i>Appendix</i> .....                                                                                           | 42 |
| <i>Appendix 1</i> - Framingham General Cardiovascular Risk Score Calculation .....                              | 42 |
| <i>Appendix 2</i> - Predication of 10-year Cardiovascular Disease Risk .....                                    | 44 |
| <i>Appendix 3</i> – International Classification of Diseases Coding .....                                       | 46 |
| <i>Appendix 4</i> - Field ID of Covariates in UK Biobank.....                                                   | 62 |
| <i>Appendix 5</i> - UK biobank codes for dementia diagnosis and classification .....                            | 63 |

## Supplementary Materials 1 – Study Design and Missing Covariates

SM Figure 1 Study workflow

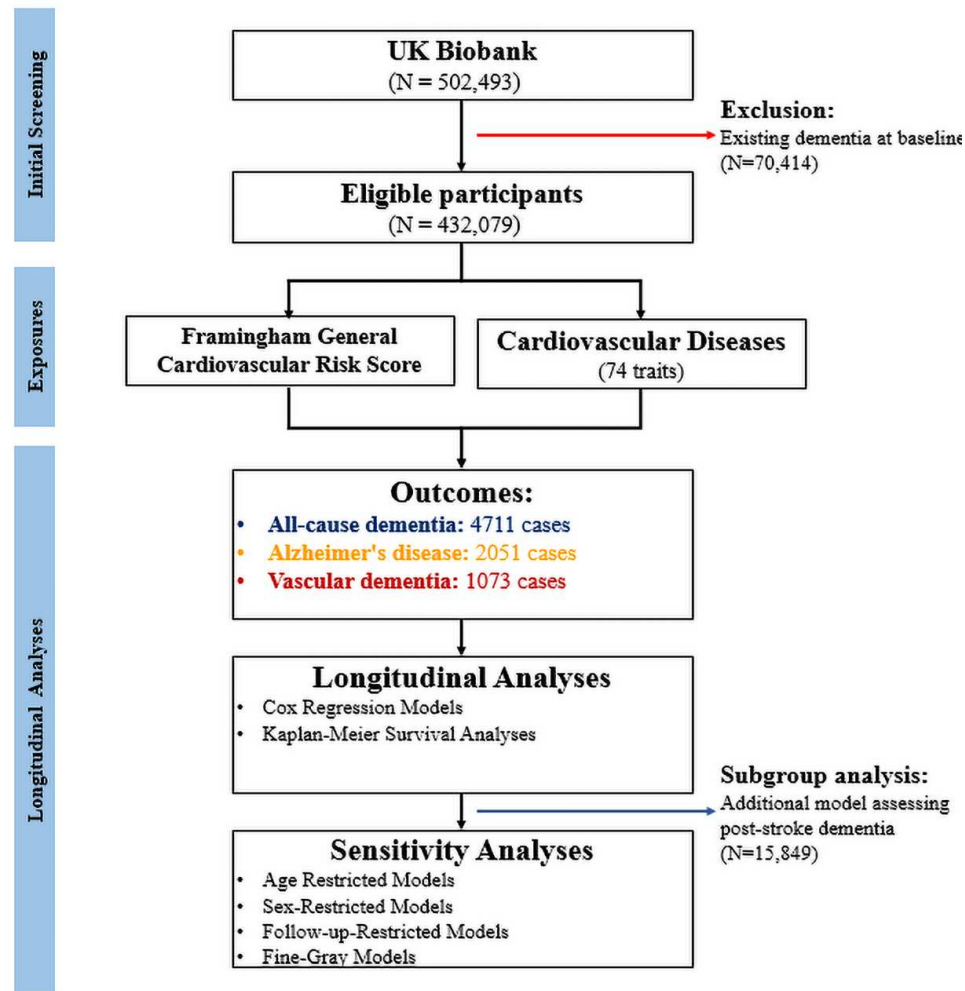

SM Table 1.1 Detailed Information on Missing Covariates

| SM Table 1.1 Detailed Information on Missing Covariates |       |                  |
|---------------------------------------------------------|-------|------------------|
| Covariates                                              | N*    | Missing rate (%) |
| Ethnicity                                               | 6087  | 1.41%            |
| MET minutes/wk                                          | 87713 | 20.30%           |
| Blood Pressure                                          | 30898 | 7.15%            |
| Smoking Status                                          | 2573  | 0.60%            |
| BMI                                                     | 2772  | 0.64%            |
| Education                                               | 86772 | 20.08%           |
| Smoking Status                                          | 2573  | 0.59%            |
| Alcohol status                                          | 1411  | 0.33%            |
| Total cholesterol                                       | 28251 | 6.54%            |
| High density lipoprotein cholesterol                    | 62597 | 14.49%           |
| <i>ApoE4</i>                                            | 62129 | 14.38%           |
| Townsend Deprivation Index                              | 552   | 0.13%            |

\*N represents the number of missing responses.

## Supplementary Materials 2 – Prevalence rates

SM Table 2.1 Prevalence Rate of Cardiovascular Disease

SM Table 2.1 Prevalence Rate of Cardiovascular Diseases

| ICD coding Traits                                                       | Non-Dementia<br>(n=427,368) | Dementia<br>(n=4,711) |
|-------------------------------------------------------------------------|-----------------------------|-----------------------|
| <b>Traits Included</b>                                                  |                             |                       |
| I00 rheumatic fever without mention of heart involvement                | 1474(0.3)                   | 28(0.6)               |
| I01 rheumatic fever with heart involvement                              | 30(0.0)                     | 0(0.0)                |
| I02 rheumatic chorea                                                    | 21(0.0)                     | 2(0.0)                |
| I05 rheumatic mitral valve diseases                                     | 742(0.2)                    | 24(0.5)               |
| I06 rheumatic aortic valve diseases                                     | 99(0.0)                     | 3(0.1)                |
| I07 rheumatic tricuspid valve diseases                                  | 1397(0.3)                   | 37(0.8)               |
| I08 multiple valve diseases                                             | 5801(1.4)                   | 187(4.0)              |
| I09 other rheumatic heart diseases                                      | 112(0.0)                    | 5(0.1)                |
| I10Primary hypertension                                                 | 145688(34.1)                | 2967(63.0)            |
| I11 hypertensive heart disease                                          | 661(0.2)                    | 20(0.4)               |
| I12 hypertensive renal disease                                          | 2077(0.5)                   | 82(1.7)               |
| I13 hypertensive heart and renal disease                                | 107(0.0)                    | 5(0.1)                |
| I15 secondary hypertension                                              | 260(0.1)                    | 8(0.2)                |
| I20 angina pectoris                                                     | 33047(7.7)                  | 925(19.6)             |
| I21 acute myocardial infarction                                         | 20190(4.7)                  | 531(11.3)             |
| I22 subsequent myocardial infarction                                    | 881(0.2)                    | 26(0.6)               |
| I23 certain current complications following acute myocardial infarction | 88(0.0)                     | 0(0.0)                |
| I24 other acute ischemic heart diseases                                 | 4155(1.0)                   | 128(2.7)              |
| I25 chronic ischemic heart disease                                      | 44798(10.5)                 | 1250(26.5)            |
| I26 pulmonary embolism                                                  | 9990(2.3)                   | 251(5.3)              |
| I27 other pulmonary heart diseases                                      | 2361(0.6)                   | 64(1.4)               |
| I28 other diseases of pulmonary vessels                                 | 119(0.0)                    | 2(0.0)                |
| I30 acute pericarditis                                                  | 612(0.1)                    | 12(0.3)               |
| I31 other diseases of pericardium                                       | 2861(0.7)                   | 56(1.2)               |
| I32 pericarditis in diseases classified elsewhere                       | 13(0.0)                     | 0(0.0)                |

|                                                                                          |            |            |
|------------------------------------------------------------------------------------------|------------|------------|
| I33 acute and subacute endocarditis                                                      | 494(0.1)   | 18(0.4)    |
| I34 nonrheumatic mitral valve disorders                                                  | 6123(1.4)  | 160(3.4)   |
| I35 nonrheumatic aortic valve disorders                                                  | 6685(1.6)  | 217(4.6)   |
| I36 nonrheumatic tricuspid valve disorders                                               | 425(0.1)   | 15(0.3)    |
| I37 pulmonary valve disorders                                                            | 546(0.1)   | 18(0.4)    |
| I38 endocarditis, valve unspecified                                                      | 905(0.2)   | 27(0.6)    |
| I39 endocarditis and heart valve disorders in diseases classified elsewhere              | 11(0.0)    | 0(0.0)     |
| I40 acute myocarditis                                                                    | 87(0.0)    | 1(0.0)     |
| I41 myocarditis in diseases classified elsewhere                                         | 10(0.0)    | 0(0.0)     |
| I42 cardiomyopathy                                                                       | 3054(0.7)  | 55(1.2)    |
| I43 cardiomyopathy in diseases classified elsewhere                                      | 100(0.0)   | 4(0.1)     |
| I44 atrioventricular and left bundle-branch block                                        | 9852(2.3)  | 404(8.6)   |
| I45 other conduction disorders                                                           | 6152(1.4)  | 244(5.2)   |
| I46 cardiac arrest                                                                       | 2519(0.6)  | 63(1.3)    |
| I47 paroxysmal tachycardia                                                               | 7207(1.7)  | 123(2.6)   |
| I48 atrial fibrillation and flutter                                                      | 31964(7.5) | 1029(21.8) |
| I49 other cardiac arrhythmias                                                            | 10815(2.5) | 257(5.5)   |
| I50 heart failure                                                                        | 14587(3.4) | 586(12.4)  |
| I51 complications and ill-defined descriptions of heart disease                          | 14073(3.3) | 457(9.7)   |
| I52 other heart disorders in diseases classified elsewhere                               | 4(0.0)     | 0(0.0)     |
| I60 subarachnoid hemorrhage                                                              | 208(0.1)   | 10(0.2)    |
| I61 intracerebral hemorrhage                                                             | 1722(0.4)  | 130(2.8)   |
| I62 other nontraumatic intracranial hemorrhage                                           | 900(0.2)   | 67(1.4)    |
| I63 cerebral infarction                                                                  | 7635(1.8)  | 453(9.6)   |
| I64 stroke, not specified as hemorrhage or infarction                                    | 8185(1.9)  | 360(7.6)   |
| I65 occlusion and stenosis of precerebral arteries, not resulting in cerebral infarction | 2234(0.5)  | 112(2.4)   |
| I66 occlusion and stenosis of cerebral arteries, not resulting in cerebral infarction    | 177(0.0)   | 5(0.1)     |
| I67 other cerebrovascular diseases                                                       | 7275(1.7)  | 904(19.2)  |
| I68 cerebrovascular disorders in diseases classified elsewhere                           | 83(0.0)    | 36(0.8)    |
| I69 sequelae of cerebrovascular disease                                                  | 2657(0.6)  | 291(6.2)   |
| I70 atherosclerosis                                                                      | 3075(0.7)  | 110(2.3)   |
| I74 arterial embolism and thrombosis                                                     | 1854(0.4)  | 46(1.0)    |

|                                                                                        |            |           |
|----------------------------------------------------------------------------------------|------------|-----------|
| I77 other disorders of arteries and arterioles                                         | 2995(0.7)  | 87(1.8)   |
| I78 diseases of capillaries                                                            | 2829(0.7)  | 38(0.8)   |
| I79 disorders of arteries, arterioles and capillaries in diseases classified elsewhere | 152(0.0)   | 8(0.2)    |
| I80 phlebitis and thrombophlebitis                                                     | 17100(4.0) | 360(7.6)  |
| I81 portal vein thrombosis                                                             | 390(0.1)   | 3(0.1)    |
| I82 other venous embolism and thrombosis                                               | 1179(0.3)  | 23(0.5)   |
| I83 varicose veins of lower extremities                                                | 22327(5.2) | 316(6.7)  |
| I84 hemorrhoids                                                                        | 30061(7.0) | 444(9.4)  |
| I85 oesophageal varices                                                                | 1062(0.2)  | 27(0.6)   |
| I86 varicose veins of other sites                                                      | 2089(0.5)  | 26(0.6)   |
| I87 other disorders of veins                                                           | 1792(0.4)  | 53(1.1)   |
| I88 nonspecific lymphadenitis                                                          | 447(0.1)   | 8(0.2)    |
| I89 other non-infective disorders of lymphatic vessels and lymph nodes                 | 2515(0.6)  | 53(1.1)   |
| I95 hypotension                                                                        | 15545(3.6) | 881(18.7) |
| I97 postprocedural disorders of circulatory system, not elsewhere classified           | 363(0.1)   | 10(0.2)   |
| I98 other disorders of circulatory system in diseases classified elsewhere             | 537(0.1)   | 21(0.4)   |
| I99 other and unspecified disorders of circulatory system                              | 563(0.1)   | 16(0.3)   |

**Excluded Traits:**

I71 aortic aneurysm and dissection  
I72 other aneurysm  
I73 other peripheral vascular diseases

**Supplementary Materials 3 – Analysis of Framingham General Cardiovascular Risk Score****SM Table 3.1 Proportional Hazards Ratio of Multi-Adjusted Model of Framingham General Cardiovascular Risk Score Analysis****SM Table 3.2 Proportional Hazards Ratio of Multi-Adjusted Model of Framingham General Cardiovascular Risk Score Analysis**

|            | Multi-adjusted model   |            |          |
|------------|------------------------|------------|----------|
|            |                        | Chi-square | <i>P</i> |
| <b>ACD</b> | FGCRS continuous score | 2.428      | 0.119    |
|            | FGCRS categories       | 25.319     | 0.013    |
| <b>AD</b>  | FGCRS continuous score | 0.389      | 0.533    |
|            | FGCRS categories       | 16.157     | 0.184    |
| <b>VaD</b> | FGCRS continuous score | 6.622      | 0.010    |
|            | FGCRS categories       | 12.289     | 0.420    |

Abbreviations: ACD, All-cause dementia; AD, Alzheimer's disease; VaD, Vascular dementia



## Supplementary Materials 4 – Analysis of All Types of Dementia

## SM Table 4.1 Minimal-Adjusted Cox Regression Model of the Association Between Cardiovascular Diseases and Dementia

SM Table 4.1 Minimal-Adjusted Cox Regression Model of the Association Between Cardiovascular Diseases and All-Cause Dementia

| Traits                                                              | ACD   |        |       | AD           |        |       | VaD    |              |       |       |        |              |
|---------------------------------------------------------------------|-------|--------|-------|--------------|--------|-------|--------|--------------|-------|-------|--------|--------------|
|                                                                     | HR    | 95% CI | P     | HR           | 95% CI | P     | HR     | 95% CI       | P     |       |        |              |
| <b>Ischemic heart disorders</b>                                     |       |        |       |              |        |       |        |              |       |       |        |              |
| Angina pectoris                                                     | 1.440 | 1.338  | 1.549 | <b>0.000</b> | 1.352  | 1.205 | 1.518  | <b>0.000</b> | 1.913 | 1.663 | 2.201  | <b>0.000</b> |
| Acute myocardial infarction                                         | 1.390 | 1.268  | 1.524 | <b>0.000</b> | 1.238  | 1.066 | 1.437  | <b>0.005</b> | 2.293 | 1.957 | 2.688  | <b>0.000</b> |
| Subsequent myocardial infarction                                    | 1.420 | 0.965  | 2.089 | 0.075        | 1.526  | 0.843 | 2.764  | 0.163        | 2.388 | 1.316 | 4.331  | <b>0.004</b> |
| Certain current complications following acute myocardial infarction | 0.000 | 0.000  | inf   | 0.963        | 0.000  | 0.000 | inf    | 0.975        | 0.000 | 0.000 | Inf    | 0.983        |
| Other acute ischemic heart diseases                                 | 1.518 | 1.273  | 1.810 | <b>0.000</b> | 1.412  | 1.065 | 1.871  | <b>0.016</b> | 2.208 | 1.636 | 2.980  | <b>0.000</b> |
| Chronic ischemic heart disease                                      | 1.520 | 1.422  | 1.626 | <b>0.000</b> | 1.386  | 1.247 | 1.539  | <b>0.000</b> | 2.173 | 1.908 | 2.476  | <b>0.000</b> |
| Atherosclerosis                                                     | 1.518 | 1.256  | 1.835 | <b>0.000</b> | 0.965  | 0.668 | 1.393  | 0.850        | 2.489 | 1.832 | 3.381  | <b>0.000</b> |
| <b>Arrhythmias and conduction disorders</b>                         |       |        |       |              |        |       |        |              |       |       |        |              |
| Atrioventricular and left bundle-branch block                       | 1.715 | 1.547  | 1.901 | <b>0.000</b> | 1.626  | 1.381 | 1.914  | <b>0.000</b> | 2.396 | 1.992 | 2.884  | <b>0.000</b> |
| Other conduction disorders                                          | 1.803 | 1.584  | 2.054 | <b>0.000</b> | 1.615  | 1.305 | 1.998  | <b>0.000</b> | 2.154 | 1.689 | 2.747  | <b>0.000</b> |
| Cardiac arrest                                                      | 1.766 | 1.377  | 2.265 | <b>0.000</b> | 1.130  | 0.701 | 1.822  | 0.616        | 2.460 | 1.611 | 3.757  | <b>0.000</b> |
| Paroxysmal tachycardia                                              | 1.027 | 0.859  | 1.229 | 0.768        | 0.969  | 0.732 | 1.283  | 0.825        | 1.478 | 1.081 | 2.019  | <b>0.014</b> |
| Atrial fibrillation and flutter                                     | 1.538 | 1.432  | 1.651 | <b>0.000</b> | 1.267  | 1.129 | 1.421  | <b>0.000</b> | 2.225 | 1.945 | 2.546  | <b>0.000</b> |
| Other cardiac arrhythmias                                           | 1.344 | 1.185  | 1.525 | <b>0.000</b> | 1.146  | 0.931 | 1.410  | 0.198        | 1.619 | 1.274 | 2.058  | <b>0.000</b> |
| <b>Blood flow-reduction disorders</b>                               |       |        |       |              |        |       |        |              |       |       |        |              |
| Cardiomyopathy                                                      | 1.081 | 0.828  | 1.410 | 0.568        | 1.091  | 0.723 | 1.646  | 0.678        | 1.814 | 1.189 | 2.769  | <b>0.006</b> |
| Cardiomyopathy in diseases classified elsewhere                     | 2.009 | 0.754  | 5.356 | 0.163        | 3.560  | 1.147 | 11.052 | <b>0.028</b> | 0.000 | 0.000 | Inf    | 0.978        |
| Heart failure                                                       | 1.852 | 1.695  | 2.023 | <b>0.000</b> | 1.657  | 1.436 | 1.911  | <b>0.000</b> | 2.662 | 2.268 | 3.123  | <b>0.000</b> |
| Hypotension                                                         | 3.152 | 2.928  | 3.394 | <b>0.000</b> | 2.469  | 2.185 | 2.790  | <b>0.000</b> | 3.962 | 3.429 | 4.577  | <b>0.000</b> |
| <b>Embolic and other cerebrovascular disorders</b>                  |       |        |       |              |        |       |        |              |       |       |        |              |
| Pulmonary embolism                                                  | 1.706 | 1.501  | 1.938 | <b>0.000</b> | 1.515  | 1.231 | 1.864  | <b>0.000</b> | 2.237 | 1.775 | 2.820  | <b>0.000</b> |
| Subarachnoid hemorrhage                                             | 4.053 | 2.179  | 7.538 | <b>0.000</b> | 0.895  | 0.126 | 6.360  | 0.912        | 3.487 | 0.871 | 13.961 | 0.078        |
| Intracerebral hemorrhage                                            | 4.120 | 3.460  | 4.905 | <b>0.000</b> | 2.576  | 1.844 | 3.599  | <b>0.000</b> | 8.696 | 6.711 | 11.268 | <b>0.000</b> |
| Other nontraumatic intracranial hemorrhage                          | 3.863 | 3.033  | 4.918 | <b>0.000</b> | 2.696  | 1.734 | 4.190  | <b>0.000</b> | 8.696 | 6.711 | 11.268 | <b>0.000</b> |
| Cerebral infarction                                                 | 2.875 | 2.607  | 3.169 | <b>0.000</b> | 1.424  | 1.163 | 1.745  | <b>0.001</b> | 7.218 | 6.229 | 8.364  | <b>0.000</b> |

|                                                                                      |       |       |        |              |       |       |        |              |        |        |        |              |
|--------------------------------------------------------------------------------------|-------|-------|--------|--------------|-------|-------|--------|--------------|--------|--------|--------|--------------|
| Stroke, not specified as hemorrhage or infarction                                    | 2.473 | 2.220 | 2.756  | <b>0.000</b> | 1.523 | 1.240 | 1.871  | <b>0.000</b> | 5.060  | 4.277  | 5.986  | <b>0.000</b> |
| Occlusion and stenosis of precerebral arteries, not resulting in cerebral infarction | 1.860 | 1.541 | 2.244  | <b>0.000</b> | 0.939 | 0.628 | 1.406  | 0.761        | 3.805  | 2.882  | 5.024  | <b>0.000</b> |
| Occlusion and stenosis of cerebral arteries, not resulting in cerebral infarction    | 1.340 | 0.557 | 3.222  | 0.513        | 0.571 | 0.080 | 4.060  | 0.576        | 1.233  | 0.173  | 8.764  | 0.834        |
| Other cerebrovascular diseases                                                       | 5.816 | 5.404 | 6.259  | <b>0.000</b> | 4.177 | 3.685 | 4.734  | <b>0.000</b> | 13.185 | 11.596 | 14.991 | <b>0.000</b> |
| Cerebrovascular disorders in diseases classified elsewhere                           | 9.074 | 6.530 | 12.611 | <b>0.000</b> | 5.117 | 2.435 | 10.755 | <b>0.000</b> | 26.905 | 17.229 | 42.016 | <b>0.000</b> |
| Sequelae of cerebrovascular disease                                                  | 5.312 | 4.716 | 5.983  | <b>0.000</b> | 2.339 | 1.788 | 3.059  | <b>0.000</b> | 13.345 | 11.243 | 15.839 | <b>0.000</b> |
| Arterial embolism and thrombosis                                                     | 1.274 | 0.953 | 1.704  | 0.102        | 0.475 | 0.226 | 0.997  | <b>0.049</b> | 2.652  | 1.752  | 4.012  | <b>0.000</b> |
| <b>Rheumatic and valvular disorders</b>                                              |       |       |        |              |       |       |        |              |        |        |        |              |
| Rheumatic fever without mention of heart involvement                                 | 1.101 | 0.759 | 1.596  | 0.613        | 0.777 | 0.404 | 1.496  | 0.450        | 0.517  | 0.166  | 1.606  | 0.254        |
| Rheumatic fever with heart involvement                                               | 0.000 | 0.000 | inf    | 0.958        | 0.000 | 0.000 | inf    | 0.975        | 7.373  | 1.037  | 52.410 | <b>0.046</b> |
| Rheumatic chorea                                                                     | 4.354 | 1.088 | 17.416 | <b>0.038</b> | 4.815 | 0.678 | 34.210 | 0.116        | 0.000  | 0.000  | Inf    | 0.982        |
| Rheumatic mitral valve diseases                                                      | 1.489 | 0.997 | 2.224  | 0.052        | 0.852 | 0.382 | 1.900  | 0.696        | 1.084  | 0.406  | 2.894  | 0.872        |
| Rheumatic aortic valve diseases                                                      | 1.204 | 0.388 | 3.733  | 0.748        | 0.000 | 0.000 | inf    | 0.969        | 0.000  | 0.000  | Inf    | 0.979        |
| Rheumatic tricuspid valve diseases                                                   | 1.201 | 0.869 | 1.659  | 0.268        | 0.911 | 0.516 | 1.606  | 0.746        | 1.485  | 0.819  | 2.690  | 0.193        |
| Multiple valve diseases                                                              | 1.293 | 1.116 | 1.497  | <b>0.001</b> | 1.058 | 0.827 | 1.353  | 0.652        | 2.007  | 1.568  | 2.569  | <b>0.000</b> |
| Other rheumatic heart diseases                                                       | 2.064 | 0.858 | 4.963  | 0.105        | 0.836 | 0.118 | 5.942  | 0.858        | 0.000  | 0.000  | Inf    | 0.980        |
| Nonrheumatic mitral valve disorders                                                  | 1.214 | 1.037 | 1.422  | <b>0.016</b> | 1.222 | 0.963 | 1.552  | 0.099        | 1.587  | 1.187  | 2.121  | <b>0.002</b> |
| Nonrheumatic aortic valve disorders                                                  | 1.261 | 1.099 | 1.446  | <b>0.001</b> | 0.890 | 0.694 | 1.140  | 0.356        | 1.618  | 1.261  | 2.077  | <b>0.000</b> |
| Nonrheumatic tricuspid valve disorders                                               | 1.402 | 0.844 | 2.329  | 0.191        | 1.033 | 0.429 | 2.487  | 0.942        | 1.668  | 0.624  | 4.455  | 0.308        |
| Pulmonary valve disorders                                                            | 1.546 | 0.973 | 2.456  | 0.065        | 1.642 | 0.820 | 3.289  | 0.162        | 1.827  | 0.759  | 4.401  | 0.179        |
| Endocarditis, valve unspecified                                                      | 1.378 | 0.944 | 2.012  | 0.097        | 0.946 | 0.472 | 1.895  | 0.876        | 2.161  | 1.159  | 4.030  | <b>0.015</b> |
| Endocarditis and heart valve disorders in diseases classified elsewhere              | 0.000 | 0.000 | inf    | 0.963        | 0.000 | 0.000 | inf    | 0.978        | 0.000  | 0.000  | Inf    | 0.987        |
| <b>Other disorders</b>                                                               |       |       |        |              |       |       |        |              |        |        |        |              |
| Primary hypertension                                                                 | 1.554 | 1.461 | 1.654  | <b>0.000</b> | 1.416 | 1.291 | 1.553  | <b>0.000</b> | 3.017  | 2.600  | 3.502  | <b>0.000</b> |
| Hypertensive heart disease                                                           | 2.430 | 1.566 | 3.771  | <b>0.000</b> | 2.690 | 1.397 | 5.181  | <b>0.003</b> | 2.879  | 1.289  | 6.427  | <b>0.010</b> |
| Hypertensive renal disease                                                           | 2.263 | 1.818 | 2.817  | <b>0.000</b> | 1.724 | 1.161 | 2.560  | <b>0.007</b> | 3.579  | 2.525  | 5.073  | <b>0.000</b> |
| Hypertensive heart and renal disease                                                 | 2.394 | 0.995 | 5.758  | 0.051        | 0.000 | 0.000 | Inf    | 0.976        | 6.638  | 2.481  | 17.757 | <b>0.000</b> |
| Secondary hypertension                                                               | 1.789 | 0.894 | 3.580  | 0.100        | 2.182 | 0.818 | 5.822  | 0.119        | 5.546  | 2.483  | 12.386 | <b>0.000</b> |
| Other pulmonary heart diseases                                                       | 1.271 | 0.993 | 1.628  | 0.057        | 0.936 | 0.603 | 1.455  | 0.770        | 1.602  | 1.028  | 2.497  | <b>0.037</b> |
| Other diseases of pulmonary vessels                                                  | 1.001 | 0.250 | 4.005  | 0.999        | 1.190 | 0.168 | 8.451  | 0.862        | 4.083  | 1.020  | 16.350 | <b>0.047</b> |
| Acute pericarditis                                                                   | 1.549 | 0.879 | 2.730  | 0.130        | 2.167 | 1.031 | 4.552  | <b>0.041</b> | 2.166  | 0.811  | 5.784  | 0.123        |
| Other diseases of pericardium                                                        | 1.236 | 0.949 | 1.609  | 0.115        | 1.101 | 0.716 | 1.692  | 0.662        | 1.852  | 1.189  | 2.883  | <b>0.006</b> |

|                                                                                    |       |       |       |              |       |       |       |              |       |       |        |              |
|------------------------------------------------------------------------------------|-------|-------|-------|--------------|-------|-------|-------|--------------|-------|-------|--------|--------------|
| Pericarditis in diseases classified elsewhere                                      | 0.000 | 0.000 | inf   | 0.971        | 0.000 | 0.000 | Inf   | 0.984        | 0.000 | 0.000 | Inf    | 0.983        |
| Acute and subacute endocarditis                                                    | 2.204 | 1.387 | 3.502 | <b>0.001</b> | 1.517 | 0.631 | 3.651 | 0.352        | 2.973 | 1.332 | 6.637  | <b>0.008</b> |
| Acute myocarditis                                                                  | 1.372 | 0.193 | 9.744 | 0.752        | 0.000 | 0.000 | inf   | 0.974        | 0.000 | 0.000 | Inf    | 0.984        |
| Myocarditis in diseases classified elsewhere                                       | 0.000 | 0.000 | inf   | 0.968        | 0.000 | 0.000 | Inf   | 0.982        | 0.000 | 0.000 | Inf    | 0.983        |
| Complications and ill-defined descriptions of heart disease                        | 1.531 | 1.389 | 1.688 | <b>0.000</b> | 1.160 | 0.979 | 1.374 | 0.085        | 2.399 | 2.025 | 2.841  | <b>0.000</b> |
| Other heart disorders in diseases classified elsewhere                             | 0.000 | 0.000 | inf   | 0.973        | 0.000 | 0.000 | inf   | 0.978        | 0.000 | 0.000 | Inf    | 0.987        |
| Other disorders of arteries and arterioles                                         | 1.379 | 1.115 | 1.706 | <b>0.003</b> | 0.757 | 0.487 | 1.177 | 0.217        | 1.720 | 1.165 | 2.541  | <b>0.006</b> |
| Diseases of capillaries                                                            | 0.990 | 0.719 | 1.362 | 0.949        | 1.011 | 0.627 | 1.630 | 0.964        | 0.930 | 0.464 | 1.865  | 0.839        |
| Disorders of arteries, arterioles and capillaries in diseases classified elsewhere | 2.714 | 1.355 | 5.433 | <b>0.005</b> | 3.653 | 1.368 | 9.752 | <b>0.010</b> | 3.858 | 1.240 | 11.997 | <b>0.020</b> |
| Phlebitis and thrombophlebitis                                                     | 1.424 | 1.278 | 1.586 | <b>0.000</b> | 1.292 | 1.088 | 1.534 | <b>0.003</b> | 1.757 | 1.432 | 2.155  | <b>0.000</b> |
| Portal vein thrombosis                                                             | 0.696 | 0.224 | 2.158 | 0.530        | 0.539 | 0.076 | 3.831 | 0.537        | 0.961 | 0.135 | 6.833  | 0.969        |
| Other venous embolism and thrombosis                                               | 1.646 | 1.093 | 2.480 | <b>0.017</b> | 0.675 | 0.253 | 1.801 | 0.433        | 2.141 | 1.018 | 4.503  | <b>0.045</b> |
| Varicose veins of lower extremities                                                | 1.015 | 0.906 | 1.139 | 0.792        | 0.675 | 0.253 | 1.801 | 0.433        | 1.358 | 1.101 | 1.676  | <b>0.004</b> |
| Hemorrhoids                                                                        | 1.111 | 1.007 | 1.225 | <b>0.035</b> | 1.109 | 0.955 | 1.287 | 0.175        | 1.223 | 1.005 | 1.489  | <b>0.045</b> |
| Oesophageal varices                                                                | 2.022 | 1.385 | 2.952 | <b>0.000</b> | 2.026 | 1.120 | 3.667 | <b>0.020</b> | 1.167 | 0.437 | 3.119  | 0.757        |
| Varicose veins of other sites                                                      | 1.190 | 0.809 | 1.750 | 0.378        | 1.371 | 0.777 | 2.420 | 0.276        | 0.741 | 0.277 | 1.978  | 0.549        |
| Other disorders of veins                                                           | 1.640 | 1.250 | 2.151 | <b>0.000</b> | 1.738 | 1.152 | 2.623 | <b>0.008</b> | 2.294 | 1.437 | 3.661  | <b>0.001</b> |
| Nonspecific lymphadenitis                                                          | 2.409 | 1.204 | 4.821 | <b>0.013</b> | 3.549 | 1.475 | 8.537 | <b>0.005</b> | 1.405 | 0.198 | 9.983  | 0.734        |
| Other non-infective disorders of lymphatic vessels and lymph nodes                 | 1.474 | 1.123 | 1.935 | <b>0.005</b> | 1.396 | 0.907 | 2.149 | 0.129        | 1.888 | 1.165 | 3.060  | <b>0.010</b> |
| Postprocedural disorders of circulatory system, not elsewhere classified           | 1.686 | 0.907 | 3.137 | 0.099        | 2.016 | 0.838 | 4.849 | 0.118        | 3.962 | 3.429 | 4.577  | <b>0.000</b> |
| Other disorders of circulatory system in diseases classified elsewhere             | 3.476 | 2.264 | 5.339 | <b>0.000</b> | 3.760 | 1.953 | 7.242 | <b>0.000</b> | 1.913 | 0.616 | 5.945  | 0.262        |
| Other and unspecified disorders of circulatory system                              | 1.661 | 1.016 | 2.714 | <b>0.043</b> | 1.909 | 0.953 | 3.824 | 0.068        | 4.415 | 2.367 | 8.234  | <b>0.000</b> |

Abbreviations: ACD, All-cause dementia; AD, Alzheimer's disease; VaD, Vascular dementia; HR, Hazards ratio; 95% CI, 95% confidential interval

Minimal-adjusted: Adjusted for Age, Sex, Ethnicity, Body-Mass-Index, and *ApoE4*.

#### SM Table 4.2 Multi-Adjusted Cox Regression Model of the Association Between Cardiovascular Diseases and Dementia

SM Table 4.2 Multi-Adjusted Cox Regression Model of the Association Between Cardiovascular Diseases and Dementia

| Traits                   | ACD |        |   | AD |        |   | VaD |        |   |
|--------------------------|-----|--------|---|----|--------|---|-----|--------|---|
|                          | HR  | 95% CI | P | HR | 95% CI | P | HR  | 95% CI | P |
| Ischemic heart disorders |     |        |   |    |        |   |     |        |   |

|                                                                                      |       |       |        |              |       |       |        |              |        |        |        |              |
|--------------------------------------------------------------------------------------|-------|-------|--------|--------------|-------|-------|--------|--------------|--------|--------|--------|--------------|
| Angina pectoris                                                                      | 1.287 | 1.192 | 1.389  | <b>0.000</b> | 1.249 | 1.109 | 1.407  | <b>0.000</b> | 1.560  | 1.348  | 1.807  | <b>0.000</b> |
| Acute myocardial infarction                                                          | 1.228 | 1.116 | 1.350  | <b>0.000</b> | 1.141 | 0.979 | 1.329  | 0.092        | 1.870  | 1.586  | 2.205  | <b>0.000</b> |
| Subsequent myocardial infarction                                                     | 1.156 | 0.779 | 1.715  | 0.473        | 1.363 | 0.752 | 2.472  | 0.307        | 1.742  | 0.958  | 3.168  | 0.069        |
| Certain current complications following acute myocardial infarction                  | 0.000 | 0.000 | inf    | 0.961        | 0.000 | 0.000 | inf    | 0.973        | 0.000  | 0.000  | Inf    | 0.979        |
| Other acute ischemic heart diseases                                                  | 1.355 | 1.134 | 1.619  | <b>0.001</b> | 1.318 | 0.994 | 1.747  | 0.056        | 1.776  | 1.309  | 2.410  | <b>0.000</b> |
| Chronic ischemic heart disease                                                       | 1.354 | 1.263 | 1.452  | <b>0.000</b> | 1.269 | 1.138 | 1.415  | <b>0.000</b> | 1.768  | 1.543  | 2.026  | <b>0.000</b> |
| Atherosclerosis                                                                      | 1.245 | 1.023 | 1.516  | <b>0.029</b> | 0.783 | 0.530 | 1.155  | 0.218        | 1.744  | 1.269  | 2.397  | <b>0.001</b> |
| <b>Arrhythmias and conduction disorders</b>                                          |       |       |        |              |       |       |        |              |        |        |        |              |
| Atrioventricular and left bundle-branch block                                        | 1.562 | 1.403 | 1.739  | <b>0.000</b> | 1.556 | 1.316 | 1.839  | <b>0.000</b> | 2.069  | 1.707  | 2.508  | <b>0.000</b> |
| Other conduction disorders                                                           | 1.658 | 1.452 | 1.893  | <b>0.000</b> | 1.531 | 1.233 | 1.901  | <b>0.000</b> | 1.867  | 1.456  | 2.394  | <b>0.000</b> |
| Cardiac arrest                                                                       | 1.609 | 1.249 | 2.074  | <b>0.000</b> | 1.110 | 0.688 | 1.792  | 0.668        | 2.082  | 1.349  | 3.214  | <b>0.001</b> |
| Paroxysmal tachycardia                                                               | 0.957 | 0.796 | 1.149  | 0.635        | 0.925 | 0.694 | 1.234  | 0.596        | 1.332  | 0.968  | 1.834  | 0.078        |
| Atrial fibrillation and flutter                                                      | 1.479 | 1.375 | 1.591  | <b>0.000</b> | 1.231 | 1.094 | 1.385  | <b>0.001</b> | 2.053  | 1.786  | 2.359  | <b>0.000</b> |
| Other cardiac arrhythmias                                                            | 1.275 | 1.120 | 1.453  | <b>0.000</b> | 1.120 | 0.906 | 1.385  | 0.295        | 1.497  | 1.168  | 1.919  | <b>0.001</b> |
| <b>Blood flow-reduction disorders</b>                                                |       |       |        |              |       |       |        |              |        |        |        |              |
| Cardiomyopathy                                                                       | 0.997 | 0.758 | 1.313  | 0.985        | 1.045 | 0.685 | 1.594  | 0.839        | 1.778  | 1.161  | 2.722  | <b>0.008</b> |
| Cardiomyopathy in diseases classified elsewhere                                      | 2.012 | 0.755 | 5.367  | 0.162        | 3.443 | 1.108 | 10.700 | <b>0.033</b> | 0.000  | 0.000  | Inf    | 0.980        |
| Heart failure                                                                        | 1.639 | 1.495 | 1.796  | <b>0.000</b> | 1.543 | 1.332 | 1.786  | <b>0.000</b> | 2.141  | 1.812  | 2.529  | <b>0.000</b> |
| Hypotension                                                                          | 2.912 | 2.700 | 3.142  | <b>0.000</b> | 2.361 | 2.084 | 2.676  | <b>0.000</b> | 3.315  | 2.853  | 3.852  | <b>0.000</b> |
| <b>Embolic and other cerebrovascular disorders</b>                                   |       |       |        |              |       |       |        |              |        |        |        |              |
| Pulmonary embolism                                                                   | 1.663 | 1.461 | 1.894  | <b>0.000</b> | 1.459 | 1.180 | 1.804  | <b>0.000</b> | 2.122  | 1.673  | 2.692  | <b>0.000</b> |
| Subarachnoid hemorrhage                                                              | 4.300 | 2.312 | 7.999  | <b>0.000</b> | 0.958 | 0.135 | 6.826  | 0.965        | 4.004  | 1.012  | 16.234 | 0.050        |
| Intracerebral hemorrhage                                                             | 3.901 | 3.261 | 4.666  | <b>0.000</b> | 2.562 | 1.825 | 3.599  | <b>0.000</b> | 7.763  | 5.941  | 10.144 | <b>0.000</b> |
| Other nontraumatic intracranial hemorrhage                                           | 3.686 | 2.883 | 4.712  | <b>0.000</b> | 2.598 | 1.652 | 4.086  | <b>0.000</b> | 4.014  | 2.514  | 6.410  | <b>0.000</b> |
| Cerebral infarction                                                                  | 2.569 | 2.322 | 2.842  | <b>0.000</b> | 1.367 | 1.114 | 1.677  | <b>0.003</b> | 5.949  | 5.096  | 6.946  | <b>0.000</b> |
| Stroke, not specified as hemorrhage or infarction                                    | 2.138 | 1.893 | 2.416  | <b>0.000</b> | 1.397 | 1.114 | 1.751  | <b>0.004</b> | 4.085  | 3.377  | 4.942  | <b>0.000</b> |
| Occlusion and stenosis of precerebral arteries, not resulting in cerebral infarction | 3.901 | 3.261 | 4.666  | <b>0.000</b> | 0.879 | 0.587 | 1.317  | 0.532        | 2.709  | 2.024  | 3.625  | <b>0.000</b> |
| Occlusion and stenosis of cerebral arteries, not resulting in cerebral infarction    | 1.188 | 0.494 | 2.859  | 0.700        | 0.555 | 0.078 | 3.949  | 0.557        | 0.942  | 0.132  | 6.708  | 0.952        |
| Other cerebrovascular diseases                                                       | 5.213 | 4.828 | 5.629  | <b>0.000</b> | 3.956 | 3.478 | 4.499  | <b>0.000</b> | 10.902 | 9.521  | 12.483 | <b>0.000</b> |
| Cerebrovascular disorders in diseases classified elsewhere                           | 9.384 | 6.750 | 13.046 | <b>0.000</b> | 5.344 | 2.542 | 11.236 | <b>0.000</b> | 29.257 | 18.695 | 45.787 | <b>0.000</b> |
| Sequelae of cerebrovascular disease                                                  | 4.592 | 4.043 | 5.215  | <b>0.000</b> | 2.261 | 1.717 | 2.976  | <b>0.000</b> | 10.506 | 8.701  | 12.686 | <b>0.000</b> |
| Arterial embolism and thrombosis                                                     | 1.052 | 0.780 | 1.417  | 0.742        | 0.430 | 0.204 | 0.904  | <b>0.026</b> | 1.879  | 1.227  | 2.879  | <b>0.004</b> |

**Rheumatic and valvular disorders**

|                                                                         |       |       |        |              |       |       |        |       |       |       |        |              |
|-------------------------------------------------------------------------|-------|-------|--------|--------------|-------|-------|--------|-------|-------|-------|--------|--------------|
| Rheumatic fever without mention of heart involvement                    | 1.063 | 0.733 | 1.543  | 0.746        | 0.759 | 0.394 | 1.461  | 0.409 | 0.486 | 0.156 | 1.511  | 0.212        |
| Rheumatic fever with heart involvement                                  | 0.000 | 0.000 | inf    | 0.961        | 0.000 | 0.000 | inf    | 0.976 | 8.443 | 1.187 | 60.051 | <b>0.033</b> |
| Rheumatic chorea                                                        | 4.708 | 1.176 | 18.851 | <b>0.029</b> | 5.712 | 0.803 | 40.639 | 0.082 | 0.000 | 0.000 | Inf    | 0.987        |
| Rheumatic mitral valve diseases                                         | 1.278 | 0.847 | 1.928  | 0.242        | 0.807 | 0.361 | 1.800  | 0.600 | 0.918 | 0.343 | 2.458  | 0.865        |
| Rheumatic aortic valve diseases                                         | 0.966 | 0.310 | 3.010  | 0.953        | 0.000 | 0.000 | inf    | 0.968 | 0.000 | 0.000 | Inf    | 0.978        |
| Rheumatic tricuspid valve diseases                                      | 1.107 | 0.797 | 1.538  | 0.545        | 0.887 | 0.503 | 1.567  | 0.680 | 1.235 | 0.661 | 2.305  | 0.508        |
| Multiple valve diseases                                                 | 1.189 | 1.023 | 1.382  | <b>0.024</b> | 0.996 | 0.774 | 1.281  | 0.973 | 1.779 | 1.380 | 2.292  | <b>0.000</b> |
| Other rheumatic heart diseases                                          | 1.573 | 0.652 | 3.795  | 0.313        | 0.674 | 0.095 | 4.800  | 0.693 | 0.000 | 0.000 | Inf    | 0.978        |
| Nonrheumatic mitral valve disorders                                     | 1.427 | 0.886 | 2.298  | 0.144        | 1.417 | 0.674 | 2.978  | 0.358 | 1.345 | 0.504 | 3.594  | 0.554        |
| Nonrheumatic aortic valve disorders                                     | 1.298 | 0.889 | 1.896  | 0.177        | 0.925 | 0.462 | 1.854  | 0.826 | 1.834 | 0.982 | 3.427  | 0.057        |
| Nonrheumatic tricuspid valve disorders                                  | 0.000 | 0.000 | inf    | 0.965        | 0.000 | 0.000 | inf    | 0.981 | 0.000 | 0.000 | Inf    | 0.985        |
| Pulmonary valve disorders                                               | 1.102 | 0.936 | 1.297  | 0.243        | 1.124 | 0.878 | 1.438  | 0.353 | 1.414 | 1.051 | 1.904  | <b>0.022</b> |
| Endocarditis, valve unspecified                                         | 1.172 | 1.019 | 1.348  | <b>0.026</b> | 0.844 | 0.656 | 1.087  | 0.188 | 1.381 | 1.069 | 1.784  | <b>0.013</b> |
| Endocarditis and heart valve disorders in diseases classified elsewhere | 1.394 | 0.839 | 2.315  | 0.200        | 1.038 | 0.431 | 2.501  | 0.933 | 1.717 | 0.643 | 4.588  | 0.281        |

**Other disorders**

|                                                             |       |       |       |              |       |       |       |              |       |       |        |              |
|-------------------------------------------------------------|-------|-------|-------|--------------|-------|-------|-------|--------------|-------|-------|--------|--------------|
| Primary hypertension                                        | 1.408 | 1.314 | 1.509 | <b>0.000</b> | 1.345 | 1.212 | 1.492 | <b>0.000</b> | 2.630 | 2.234 | 3.097  | <b>0.000</b> |
| Hypertensive heart disease                                  | 2.049 | 1.288 | 3.257 | <b>0.002</b> | 2.332 | 1.163 | 4.675 | <b>0.017</b> | 1.629 | 0.609 | 4.358  | 0.331        |
| Hypertensive renal disease                                  | 1.608 | 1.274 | 2.030 | <b>0.000</b> | 1.424 | 0.955 | 2.122 | 0.083        | 1.948 | 1.332 | 2.847  | <b>0.001</b> |
| Hypertensive heart and renal disease                        | 1.766 | 0.734 | 4.253 | 0.204        | 0.000 | 0.000 | Inf   | 0.977        | 3.001 | 0.961 | 9.365  | 0.058        |
| Secondary hypertension                                      | 1.645 | 0.822 | 3.293 | 0.160        | 2.050 | 0.768 | 5.474 | 0.152        | 4.540 | 2.031 | 10.147 | <b>0.000</b> |
| Other pulmonary heart diseases                              | 1.155 | 0.900 | 1.483 | 0.258        | 0.895 | 0.575 | 1.392 | 0.622        | 1.300 | 0.824 | 2.052  | 0.260        |
| Other diseases of pulmonary vessels                         | 1.003 | 0.251 | 4.014 | 0.996        | 1.232 | 0.173 | 8.756 | 0.835        | 4.014 | 1.002 | 16.085 | <b>0.050</b> |
| Acute pericarditis                                          | 1.457 | 0.806 | 2.634 | 0.212        | 1.870 | 0.839 | 4.170 | 0.126        | 2.222 | 0.832 | 5.934  | 0.111        |
| Other diseases of pericardium                               | 1.153 | 0.883 | 1.505 | 0.296        | 1.067 | 0.694 | 1.641 | 0.767        | 1.648 | 1.057 | 2.569  | <b>0.027</b> |
| Pericarditis in diseases classified elsewhere               | 0.000 | 0.000 | inf   | 0.970        | 0.000 | 0.000 | Inf   | 0.984        | 0.000 | 0.000 | Inf    | 0.984        |
| Acute and subacute endocarditis                             | 1.999 | 1.256 | 3.180 | <b>0.003</b> | 1.402 | 0.582 | 3.379 | 0.452        | 2.563 | 1.145 | 5.734  | <b>0.022</b> |
| Acute myocarditis                                           | 0.000 | 0.000 | inf   | 0.958        | 0.000 | 0.000 | inf   | 0.976        | 0.000 | 0.000 | Inf    | 0.982        |
| Myocarditis in diseases classified elsewhere                | 0.000 | 0.000 | inf   | 0.969        | 0.000 | 0.000 | Inf   | 0.982        | 0.000 | 0.000 | Inf    | 0.985        |
| Complications and ill-defined descriptions of heart disease | 1.398 | 1.264 | 1.545 | <b>0.000</b> | 1.075 | 0.903 | 1.279 | 0.416        | 2.030 | 1.704 | 2.419  | <b>0.000</b> |
| Other heart disorders in diseases classified elsewhere      | 0.000 | 0.000 | inf   | 0.976        | 0.000 | 0.000 | inf   | 0.980        | 0.001 | 0.000 | Inf    | 0.986        |
| Other disorders of arteries and arterioles                  | 1.207 | 0.974 | 1.496 | 0.086        | 0.698 | 0.449 | 1.086 | 0.111        | 1.275 | 0.855 | 1.901  | 0.234        |

|                                                                                    |       |       |       |              |       |       |       |              |       |       |        |              |
|------------------------------------------------------------------------------------|-------|-------|-------|--------------|-------|-------|-------|--------------|-------|-------|--------|--------------|
| Diseases of capillaries                                                            | 0.920 | 0.660 | 1.284 | 0.625        | 1.013 | 0.628 | 1.632 | 0.959        | 0.817 | 0.388 | 1.719  | 0.594        |
| Disorders of arteries, arterioles and capillaries in diseases classified elsewhere | 1.325 | 0.628 | 2.794 | 0.460        | 2.153 | 0.799 | 5.800 | 0.129        | 1.395 | 0.446 | 4.370  | 0.567        |
| Phlebitis and thrombophlebitis                                                     | 1.393 | 1.248 | 1.556 | <b>0.000</b> | 1.263 | 1.061 | 1.505 | <b>0.009</b> | 1.719 | 1.396 | 2.118  | <b>0.000</b> |
| Portal vein thrombosis                                                             | 0.679 | 0.219 | 2.108 | 0.503        | 0.541 | 0.076 | 3.844 | 0.539        | 0.900 | 0.127 | 6.398  | 0.916        |
| Other venous embolism and thrombosis                                               | 1.604 | 1.064 | 2.417 | <b>0.024</b> | 0.673 | 0.252 | 1.796 | 0.430        | 1.999 | 0.950 | 4.206  | 0.068        |
| Varicose veins of lower extremities                                                | 1.038 | 0.924 | 1.165 | 0.534        | 1.137 | 0.961 | 1.346 | 0.135        | 1.396 | 1.125 | 1.730  | <b>0.002</b> |
| Hemorrhoids                                                                        | 1.085 | 0.982 | 1.199 | 0.111        | 1.108 | 0.953 | 1.288 | 0.182        | 1.154 | 0.940 | 1.416  | 0.171        |
| Oesophageal varices                                                                | 1.696 | 1.152 | 2.496 | <b>0.007</b> | 1.849 | 1.021 | 3.349 | <b>0.043</b> | 0.655 | 0.211 | 2.039  | 0.466        |
| Varicose veins of other sites                                                      | 1.207 | 0.814 | 1.789 | 0.349        | 1.433 | 0.811 | 2.529 | 0.215        | 0.570 | 0.183 | 1.772  | 0.331        |
| Other disorders of veins                                                           | 1.544 | 1.174 | 2.031 | <b>0.002</b> | 1.716 | 1.136 | 2.591 | <b>0.010</b> | 1.994 | 1.232 | 3.229  | <b>0.005</b> |
| Nonspecific lymphadenitis                                                          | 2.475 | 1.237 | 4.954 | <b>0.010</b> | 3.694 | 1.535 | 8.889 | <b>0.004</b> | 1.484 | 0.209 | 10.549 | 0.693        |
| Other non-infective disorders of lymphatic vessels and lymph nodes                 | 1.395 | 1.057 | 1.840 | <b>0.019</b> | 1.387 | 0.900 | 2.135 | 0.138        | 1.641 | 0.997 | 2.699  | 0.051        |
| Postprocedural disorders of circulatory system, not elsewhere classified           | 1.435 | 0.746 | 2.762 | 0.279        | 1.893 | 0.786 | 4.559 | 0.155        | 1.368 | 0.341 | 5.481  | 0.659        |
| Other disorders of circulatory system in diseases classified elsewhere             | 2.698 | 1.737 | 4.193 | <b>0.000</b> | 3.212 | 1.665 | 6.197 | <b>0.001</b> | 0.861 | 0.215 | 3.455  | 0.833        |
| Other and unspecified disorders of circulatory system                              | 1.463 | 0.894 | 2.392 | 0.130        | 1.793 | 0.894 | 3.596 | 0.100        | 3.238 | 1.727 | 6.071  | <b>0.000</b> |

Abbreviations: ACD, All-cause dementia; AD, Alzheimer's disease; VaD, Vascular dementia; HR, Hazards ratio; 95% CI, 95% confidential interval

Multi-adjusted: Adjusted for Age, Sex, Education, Ethnicity, Body-Mass-Index, Metabolic equivalent of task-min/week, Smoking Status, Alcohol Intake, Townsend deprivation index at recruitment, Hypertension, Diabetes Mellitus, Hypercholesterolemia, History of Stroke, Blood pressure-lowering medication, Cholesterol- Lowering Medication, Insulin, *ApoE4*, Pacemaker.

### SM Table 4.3 Proportional Hazards Ratio of Multi-Adjusted Cox Regression Model

SM Table 4.3 Proportional Hazards Ratio of Multi-Adjusted Cox Regression Model

| Traits                                                              | ACD        |           | AD         |           | VaD        |           |
|---------------------------------------------------------------------|------------|-----------|------------|-----------|------------|-----------|
|                                                                     | Chi-square | P         | Chi-square | P         | Chi-square | P         |
| <b>Ischemic heart disorders</b>                                     |            |           |            |           |            |           |
| Angina pectoris                                                     | 14.400     | 0.702     | 22.840     | 0.197     | 21.682     | 0.246     |
| Acute myocardial infarction                                         | 14.065     | 0.725     | 23.110     | 0.186     | 20.100     | 0.330     |
| Subsequent myocardial infarction                                    | 15.659     | 0.616     | 23.232     | 0.182     | 19.000     | 0.391     |
| Certain current complications following acute myocardial infarction | <i>NA</i>  | <i>NA</i> | <i>NA</i>  | <i>NA</i> | <i>NA</i>  | <i>NA</i> |
| Other acute ischemic heart diseases                                 | 12.705     | 0.810     | 22.900     | 0.196     | 19.400     | 0.366     |
| Chronic ischemic heart disease                                      | 22.200     | 0.224     | 24.031     | 0.154     | 20.700     | 0.296     |

|                                                                                      |           |           |           |           |           |           |
|--------------------------------------------------------------------------------------|-----------|-----------|-----------|-----------|-----------|-----------|
| Atherosclerosis                                                                      | 19.834    | 0.342     | 25.523    | 0.111     | 21.900    | 0.240     |
| <b>Arrhythmias and conduction disorders</b>                                          |           |           |           |           |           |           |
| Atrioventricular and left bundle-branch block                                        | 13.260    | 0.780     | 23.034    | 0.189     | 18.900    | 0.396     |
| Other conduction disorders                                                           | 15.900    | 0.599     | 22.687    | 0.203     | 21.400    | 0.258     |
| Cardiac arrest                                                                       | 14.348    | 0.710     | 22.891    | 0.195     | 19.200    | 0.380     |
| Paroxysmal tachycardia                                                               | 21.209    | 0.269     | 29.667    | 0.041     | 21.200    | 0.272     |
| Atrial fibrillation and flutter                                                      | 15.157    | 0.650     | 23.433    | 0.175     | 19.934    | 0.337     |
| Other cardiac arrhythmias                                                            | 12.800    | 0.800     | 22.954    | 0.192     | 19.094    | 0.386     |
| <b>Blood flow-reduction disorders</b>                                                |           |           |           |           |           |           |
| Cardiomyopathy                                                                       | 12.081    | 0.840     | 22.834    | 0.197     | 19.100    | 0.388     |
| Cardiomyopathy in diseases classified elsewhere                                      | 14.815    | 0.675     | 24.000    | 0.155     | <i>NA</i> | <i>NA</i> |
| Heart failure                                                                        | 12.236    | 0.830     | 22.700    | 0.201     | 18.700    | 0.408     |
| Hypotension                                                                          | 18.000    | 0.456     | 26.881    | 0.081     | 20.262    | 0.318     |
| <b>Embolic and other cerebrovascular disorders</b>                                   |           |           |           |           |           |           |
| Pulmonary embolism                                                                   | 15.500    | 0.629     | 23.500    | 0.171     | 20.800    | 0.291     |
| Subarachnoid hemorrhage                                                              | 12.494    | 0.820     | 23.186    | 0.184     | 19.200    | 0.380     |
| Intracerebral hemorrhage                                                             | 12.522    | 0.820     | 22.641    | 0.205     | 19.338    | 0.371     |
| Other nontraumatic intracranial hemorrhage                                           | 15.081    | 0.657     | 25.600    | 0.109     | 19.100    | 0.383     |
| Cerebral infarction                                                                  | 11.500    | 0.870     | 22.500    | 0.212     | 20.725    | 0.294     |
| Stroke, not specified as hemorrhage or infarction                                    | 27.600    | 0.068     | 27.700    | 0.067     | 21.208    | 0.269     |
| Occlusion and stenosis of precerebral arteries, not resulting in cerebral infarction | 12.200    | 0.830     | 23.700    | 0.164     | 20.000    | 0.340     |
| Occlusion and stenosis of cerebral arteries, not resulting in cerebral infarction    | 13.529    | 0.760     | 23.106    | 0.187     | 19.076    | 0.387     |
| Other cerebrovascular diseases                                                       | 12.920    | 0.800     | 23.991    | 0.155     | 17.200    | 0.509     |
| Cerebrovascular disorders in diseases classified elsewhere                           | 12.920    | 0.800     | 22.319    | 0.218     | 20.699    | 0.295     |
| Sequelae of cerebrovascular disease                                                  | 12.890    | 0.800     | 22.600    | 0.208     | 18.993    | 0.392     |
| Arterial embolism and thrombosis                                                     | 12.180    | 0.840     | 22.540    | 0.209     | 19.100    | 0.388     |
| <b>Rheumatic and valvular disorders</b>                                              |           |           |           |           |           |           |
| Rheumatic fever without mention of heart involvement                                 | 12.089    | 0.840     | 24.980    | 0.126     | 20.200    | 0.324     |
| Rheumatic fever with heart involvement                                               | <i>NA</i> | <i>NA</i> | <i>NA</i> | <i>NA</i> | 19.100    | 0.383     |
| Rheumatic chorea                                                                     | 12.870    | 0.800     | 22.804    | 0.198     | <i>NA</i> | <i>NA</i> |
| Rheumatic mitral valve diseases                                                      | 12.108    | 0.840     | 22.687    | 0.203     | 19.400    | 0.370     |
| Rheumatic aortic valve diseases                                                      | 13.988    | 0.730     | <i>NA</i> | <i>NA</i> | <i>NA</i> | <i>NA</i> |

|                                                                                    |           |           |           |           |           |           |
|------------------------------------------------------------------------------------|-----------|-----------|-----------|-----------|-----------|-----------|
| Rheumatic tricuspid valve diseases                                                 | 13.132    | 0.780     | 23.808    | 0.161     | 19.800    | 0.342     |
| Multiple valve diseases                                                            | 13.427    | 0.770     | 28.403    | 0.056     | 19.400    | 0.370     |
| Other rheumatic heart diseases                                                     | 16.071    | 0.588     | 24.803    | 0.130     | <i>NA</i> | <i>NA</i> |
| Nonrheumatic mitral valve disorders                                                | 12.375    | 0.830     | 22.500    | 0.209     | 20.300    | 0.317     |
| Nonrheumatic aortic valve disorders                                                | 13.076    | 0.790     | 22.550    | 0.209     | 20.500    | 0.307     |
| Nonrheumatic tricuspid valve disorders                                             | <i>NA</i> | <i>NA</i> | <i>NA</i> | <i>NA</i> | <i>NA</i> | <i>NA</i> |
| Pulmonary valve disorders                                                          | 12.690    | 0.810     | 23.279    | 0.180     | 19.600    | 0.355     |
| Endocarditis, valve unspecified                                                    | 13.651    | 0.750     | 25.107    | 0.122     | 19.516    | 0.361     |
| Endocarditis and heart valve disorders in diseases classified elsewhere            | 13.002    | 0.790     | 22.600    | 0.207     | 21.018    | 0.279     |
| <b>Other disorders</b>                                                             |           |           |           |           |           |           |
| Primary hypertension                                                               | 12.200    | 0.830     | 24.196    | 0.149     | 19.764    | 0.346     |
| Hypertensive heart disease                                                         | 1.220     | 0.830     | 22.682    | 0.203     | 19.000    | 0.391     |
| Hypertensive renal disease                                                         | 20.087    | 0.286     | 26.252    | 0.094     | 21.000    | 0.280     |
| Hypertensive heart and renal disease                                               | 13.802    | 0.740     | <i>NA</i> | <i>NA</i> | 19.500    | 0.363     |
| Secondary hypertension                                                             | 13.757    | 0.740     | 22.628    | 0.205     | 19.442    | 0.365     |
| Other pulmonary heart diseases                                                     | 12.057    | 0.840     | 23.456    | 0.174     | 19.100    | 0.385     |
| Other diseases of pulmonary vessels                                                | 13.550    | 0.760     | 23.729    | 0.164     | 20.900    | 0.287     |
| Acute pericarditis                                                                 | 12.992    | 0.790     | 22.616    | 0.206     | 19.500    | 0.362     |
| Other diseases of pericardium                                                      | 13.287    | 0.770     | 24.043    | 0.154     | 19.100    | 0.387     |
| Pericarditis in diseases classified elsewhere                                      | <i>NA</i> | <i>NA</i> | <i>NA</i> | <i>NA</i> | <i>NA</i> | <i>NA</i> |
| Acute and subacute endocarditis                                                    | 12.520    | 0.820     | 23.046    | 0.189     | 19.700    | 0.352     |
| Acute myocarditis                                                                  | 12.158    | 0.840     | <i>NA</i> | <i>NA</i> | <i>NA</i> | <i>NA</i> |
| Myocarditis in diseases classified elsewhere                                       | <i>NA</i> | <i>NA</i> | <i>NA</i> | <i>NA</i> | <i>NA</i> | <i>NA</i> |
| Complications and ill-defined descriptions of heart disease                        | 12.247    | 0.830     | 22.925    | 0.194     | 19.052    | 0.389     |
| Other heart disorders in diseases classified elsewhere                             | <i>NA</i> | <i>NA</i> | <i>NA</i> | <i>NA</i> | <i>NA</i> | <i>NA</i> |
| Other disorders of arteries and arterioles                                         | 12.144    | 0.840     | 22.816    | 0.198     | 19.100    | 0.388     |
| Diseases of capillaries                                                            | 12.056    | 0.840     | 22.557    | 0.208     | 20.100    | 0.326     |
| Disorders of arteries, arterioles and capillaries in diseases classified elsewhere | 13.010    | 0.790     | 22.676    | 0.203     | 26.100    | 0.097     |
| Phlebitis and thrombophlebitis                                                     | 13.100    | 0.790     | 22.946    | 0.193     | 18.991    | 0.392     |
| Portal vein thrombosis                                                             | 13.782    | 0.740     | 23.154    | 0.185     | 20.000    | 0.332     |
| Other venous embolism and thrombosis                                               | 12.761    | 0.810     | 22.583    | 0.207     | 19.000    | 0.389     |
| Varicose veins of lower extremities                                                | 12.152    | 0.840     | 22.896    | 0.195     | 18.978    | 0.393     |



|                                                                          |        |       |        |       |        |       |
|--------------------------------------------------------------------------|--------|-------|--------|-------|--------|-------|
| Hemorrhoids                                                              | 12.350 | 0.830 | 22.668 | 0.204 | 22.300 | 0.221 |
| Oesophageal varices                                                      | 13.796 | 0.740 | 22.532 | 0.209 | 19.651 | 0.353 |
| Varicose veins of other sites                                            | 13.670 | 0.750 | 22.600 | 0.207 | 20.024 | 0.331 |
| Other disorders of veins                                                 | 12.316 | 0.830 | 25.525 | 0.111 | 18.898 | 0.398 |
| Nonspecific lymphadenitis                                                | 13.238 | 0.780 | 22.560 | 0.208 | 26.400 | 0.091 |
| Other non-infective disorders of lymphatic vessels and lymph nodes       | 13.454 | 0.760 | 22.588 | 0.207 | 20.100 | 0.325 |
| Postprocedural disorders of circulatory system, not elsewhere classified | 12.142 | 0.840 | 22.673 | 0.204 | 19.400 | 0.366 |
| Other disorders of circulatory system in diseases classified elsewhere   | 12.135 | 0.840 | 23.300 | 0.179 | 19.100 | 0.385 |
| Other and unspecified disorders of circulatory system                    | 12.083 | 0.840 | 22.713 | 0.202 | 19.101 | 0.386 |

Abbreviations: ACD, All-cause dementia; AD, Alzheimer's disease; VaD, Vascular dementia; 95% CI, 95% confidential interval; NA, not applicable

## Supplementary Materials 5 - Sensitivity Analysis: Age-Restricted Models

## SM Table 5.1 Association Between Cardiovascular Diseases and All-Cause Dementia in Age-Restricted Model

SM Table 5.1 Association Between Cardiovascular Diseases and All-Cause Dementia in Age-Restricted Model

| Traits                                                                               | Age<65 |             |              | Age>65 |              |              |
|--------------------------------------------------------------------------------------|--------|-------------|--------------|--------|--------------|--------------|
|                                                                                      | HR     | 95% CI      | P            | HR     | 95% CI       | P            |
| <b>Ischemic heart disorders</b>                                                      |        |             |              |        |              |              |
| Angina pectoris                                                                      | 1.514  | 1.337 1.716 | <b>0.000</b> | 1.175  | 1.067 1.294  | <b>0.001</b> |
| Acute myocardial infarction                                                          | 1.217  | 1.034 1.434 | <b>0.018</b> | 1.230  | 1.095 1.383  | <b>0.001</b> |
| Other acute ischemic heart diseases                                                  | 1.230  | 0.893 1.693 | 0.205        | 1.419  | 1.145 1.760  | <b>0.001</b> |
| Chronic ischemic heart disease                                                       | 1.492  | 1.329 1.674 | <b>0.000</b> | 1.284  | 1.177 1.402  | <b>0.000</b> |
| Atherosclerosis                                                                      | 1.208  | 0.848 1.721 | 0.296        | 1.259  | 0.994 1.594  | 0.056        |
| <b>Arrhythmias and conduction disorders</b>                                          |        |             |              |        |              |              |
| Atrioventricular and left bundle-branch block                                        | 2.049  | 1.712 2.451 | <b>0.000</b> | 1.388  | 1.215 1.586  | <b>0.000</b> |
| Other conduction disorders                                                           | 1.696  | 1.331 2.161 | <b>0.000</b> | 1.659  | 1.416 1.945  | <b>0.000</b> |
| Cardiac arrest                                                                       | 1.744  | 1.143 2.663 | <b>0.010</b> | 1.537  | 1.119 2.111  | <b>0.008</b> |
| Atrial fibrillation and flutter                                                      | 1.500  | 1.319 1.704 | <b>0.000</b> | 1.469  | 1.344 1.605  | <b>0.000</b> |
| Other cardiac arrhythmias                                                            | 1.283  | 1.028 1.603 | <b>0.028</b> | 1.273  | 1.084 1.495  | <b>0.003</b> |
| <b>Blood flow-reduction disorders</b>                                                |        |             |              |        |              |              |
| Heart failure                                                                        | 1.823  | 1.551 2.142 | <b>0.000</b> | 1.568  | 1.403 1.753  | <b>0.000</b> |
| Hypotension                                                                          | 3.261  | 2.878 3.695 | <b>0.000</b> | 2.738  | 2.489 3.012  | <b>0.000</b> |
| <b>Embolic and other cerebrovascular disorders</b>                                   |        |             |              |        |              |              |
| Pulmonary embolism                                                                   | 1.705  | 1.378 2.110 | <b>0.000</b> | 1.633  | 1.386 1.923  | <b>0.000</b> |
| Subarachnoid hemorrhage                                                              | 2.295  | 0.573 9.187 | 0.240        | 4.912  | 2.338 10.319 | <b>0.000</b> |
| Intracerebral hemorrhage                                                             | 3.349  | 2.381 4.711 | <b>0.000</b> | 4.125  | 3.340 5.093  | <b>0.000</b> |
| Other nontraumatic intracranial hemorrhage                                           | 3.754  | 2.434 5.789 | <b>0.000</b> | 3.564  | 2.643 4.804  | <b>0.000</b> |
| Cerebral infarction                                                                  | 3.028  | 2.549 3.597 | <b>0.000</b> | 2.368  | 2.090 2.683  | <b>0.000</b> |
| Stroke, not specified as hemorrhage or infarction                                    | 2.445  | 1.993 3.000 | <b>0.000</b> | 1.994  | 1.713 2.321  | <b>0.000</b> |
| Occlusion and stenosis of precerebral arteries, not resulting in cerebral infarction | 1.581  | 1.090 2.293 | <b>0.016</b> | 1.613  | 1.288 2.020  | <b>0.000</b> |

|                                                                        |        |       |        |              |       |       |        |              |
|------------------------------------------------------------------------|--------|-------|--------|--------------|-------|-------|--------|--------------|
| Other cerebrovascular diseases                                         | 6.795  | 5.983 | 7.718  | <b>0.000</b> | 4.572 | 4.155 | 5.031  | <b>0.000</b> |
| Cerebrovascular disorders in diseases classified elsewhere             | 15.315 | 8.420 | 27.854 | <b>0.000</b> | 7.848 | 5.280 | 11.664 | <b>0.000</b> |
| Sequelae of cerebrovascular disease                                    | 5.672  | 4.640 | 6.934  | <b>0.000</b> | 4.029 | 3.416 | 4.751  | <b>0.000</b> |
| <b>Rheumatic and valvular disorders</b>                                |        |       |        |              |       |       |        |              |
| Rheumatic chorea                                                       | 0.000  | 0.000 | Inf    | 0.980        | 5.593 | 1.395 | 22.421 | <b>0.015</b> |
| Multiple valve diseases                                                | 1.230  | 0.932 | 1.624  | 0.143        | 1.177 | 0.984 | 1.408  | 0.074        |
| Nonrheumatic aortic valve disorders                                    | 1.649  | 1.317 | 2.066  | <b>0.000</b> | 0.992 | 0.830 | 1.185  | 0.927        |
| <b>Other disorders</b>                                                 |        |       |        |              |       |       |        |              |
| Primary hypertension                                                   | 1.613  | 1.448 | 1.797  | <b>0.000</b> | 1.276 | 1.167 | 1.395  | <b>0.000</b> |
| Hypertensive heart disease                                             | 2.133  | 0.955 | 4.764  | 0.065        | 1.976 | 1.120 | 3.489  | <b>0.019</b> |
| Hypertensive renal disease                                             | 1.469  | 0.976 | 2.212  | 0.065        | 1.677 | 1.263 | 2.227  | <b>0.000</b> |
| Acute and subacute endocarditis                                        | 2.922  | 1.610 | 5.304  | <b>0.000</b> | 1.354 | 0.644 | 2.847  | 0.425        |
| Complications and ill-defined descriptions of heart disease            | 1.619  | 1.370 | 1.914  | <b>0.000</b> | 1.298 | 1.146 | 1.471  | <b>0.000</b> |
| Phlebitis and thrombophlebitis                                         | 1.473  | 1.230 | 1.764  | <b>0.000</b> | 1.339 | 1.165 | 1.539  | <b>0.000</b> |
| Other venous embolism and thrombosis                                   | 1.701  | 0.961 | 3.012  | 0.068        | 1.478 | 0.817 | 2.673  | 0.196        |
| Oesophageal varices                                                    | 2.099  | 1.239 | 3.557  | <b>0.006</b> | 1.387 | 0.785 | 2.450  | 0.260        |
| Other disorders of veins                                               | 1.790  | 1.161 | 2.757  | <b>0.008</b> | 1.395 | 0.978 | 2.450  | 0.066        |
| Nonspecific lymphadenitis                                              | 2.904  | 1.207 | 6.989  | <b>0.017</b> | 1.990 | 0.641 | 6.178  | 0.234        |
| Other non-infective disorders of lymphatic vessels and lymph nodes     | 1.669  | 1.122 | 2.483  | <b>0.011</b> | 1.204 | 0.817 | 1.775  | 0.347        |
| Other disorders of circulatory system in diseases classified elsewhere | 3.212  | 1.770 | 5.828  | <b>0.000</b> | 2.242 | 1.163 | 4.323  | <b>0.016</b> |

Abbreviations: HR, Hazard Ratios; 95% CI, 95% confidential interval

Multi-adjusted: Adjusted for Age, Sex, Education, Ethnicity, Body-Mass-Index, Metabolic equivalent of task-min/week, Smoking Status, Alcohol Intake, Townsend deprivation index at recruitment, Hypertension, Diabetes Mellitus, Hypercholesterolemia, History of Stroke, Blood pressure-lowering medication, Cholesterol- Lowering Medication, Insulin, *ApoE4*, Pacemaker.

**SM Table 5.2 Association Between Cardiovascular Diseases and Alzheimer's Disease in Age-Restricted Model**

**SM Table 5.2 Association Between Cardiovascular Diseases and Alzheimer's disease in Age-Restricted Model**

| Traits                          | Age<65 |        |   | Age>65 |        |   |
|---------------------------------|--------|--------|---|--------|--------|---|
|                                 | HR     | 95% CI | P | HR     | 95% CI | P |
| <b>Ischemic heart disorders</b> |        |        |   |        |        |   |

|                                                                        |        |       |        |              |       |       |        |              |
|------------------------------------------------------------------------|--------|-------|--------|--------------|-------|-------|--------|--------------|
| Angina pectoris                                                        | 1.433  | 1.174 | 1.748  | <b>0.000</b> | 1.165 | 1.004 | 1.351  | <b>0.044</b> |
| Chronic ischemic heart disease                                         | 1.467  | 1.223 | 1.759  | <b>0.000</b> | 1.178 | 1.028 | 1.349  | <b>0.018</b> |
| <b>Arrhythmias and conduction disorders</b>                            |        |       |        |              |       |       |        |              |
| Atrioventricular and left bundle-branch block                          | 2.100  | 1.583 | 2.786  | <b>0.000</b> | 1.375 | 1.118 | 1.691  | <b>0.003</b> |
| Other conduction disorders                                             | 1.628  | 1.097 | 2.417  | <b>0.016</b> | 1.508 | 1.164 | 1.953  | <b>0.002</b> |
| Atrial fibrillation and flutter                                        | 1.255  | 1.015 | 1.550  | <b>0.036</b> | 1.224 | 1.062 | 1.411  | <b>0.005</b> |
| <b>Blood flow-reduction disorders</b>                                  |        |       |        |              |       |       |        |              |
| Cardiomyopathy in diseases classified elsewhere                        | 5.061  | 0.711 | 36.005 | 0.105        | 2.940 | 0.732 | 11.802 | 0.128        |
| Heart failure                                                          | 1.803  | 1.389 | 2.340  | <b>0.000</b> | 1.452 | 1.216 | 1.733  | <b>0.000</b> |
| Hypotension                                                            | 2.436  | 1.967 | 3.017  | <b>0.000</b> | 2.332 | 1.999 | 2.719  | <b>0.000</b> |
| <b>Embolic and other cerebrovascular disorders</b>                     |        |       |        |              |       |       |        |              |
| Pulmonary embolism                                                     | 1.863  | 1.353 | 2.566  | <b>0.000</b> | 1.240 | 0.934 | 1.647  | 0.137        |
| Intracerebral hemorrhage                                               | 2.851  | 1.609 | 5.051  | <b>0.000</b> | 2.409 | 1.579 | 3.676  | <b>0.000</b> |
| Other nontraumatic intracranial hemorrhage                             | 2.302  | 0.952 | 5.567  | 0.064        | 2.665 | 1.572 | 4.518  | <b>0.000</b> |
| Cerebral infarction                                                    | 1.453  | 1.002 | 2.108  | <b>0.049</b> | 1.336 | 1.045 | 1.707  | <b>0.021</b> |
| Stroke, not specified as hemorrhage or infarction                      | 1.478  | 0.988 | 2.211  | 0.058        | 1.368 | 1.041 | 1.798  | <b>0.024</b> |
| Other cerebrovascular diseases                                         | 5.066  | 4.069 | 6.308  | <b>0.000</b> | 3.550 | 3.029 | 4.160  | <b>0.000</b> |
| Cerebrovascular disorders in diseases classified elsewhere             | 14.908 | 5.547 | 40.069 | <b>0.000</b> | 2.790 | 0.897 | 8.676  | 0.076        |
| Sequelae of cerebrovascular disease                                    | 3.228  | 2.144 | 4.858  | <b>0.000</b> | 1.795 | 1.235 | 2.610  | <b>0.002</b> |
| Arterial embolism and thrombosis                                       | 0.167  | 0.023 | 1.193  | 0.074        | 0.567 | 0.254 | 1.266  | 0.166        |
| <b>Other disorders</b>                                                 |        |       |        |              |       |       |        |              |
| Primary hypertension                                                   | 1.587  | 1.346 | 1.872  | <b>0.000</b> | 1.204 | 1.054 | 1.374  | <b>0.006</b> |
| Hypertensive heart disease                                             | 1.973  | 0.491 | 7.925  | 0.338        | 2.412 | 1.079 | 5.388  | <b>0.032</b> |
| Phlebitis and thrombophlebitis                                         | 1.453  | 1.097 | 1.923  | <b>0.009</b> | 1.158 | 0.926 | 1.449  | 0.200        |
| Oesophageal varices                                                    | 1.611  | 0.602 | 4.312  | 0.342        | 2.079 | 0.987 | 4.381  | 0.054        |
| Other disorders of veins                                               | 2.500  | 1.374 | 4.546  | <b>0.003</b> | 1.333 | 0.754 | 2.356  | 0.323        |
| Nonspecific lymphadenitis                                              | 4.505  | 1.448 | 14.013 | <b>0.009</b> | 3.005 | 0.750 | 12.042 | 0.120        |
| Other disorders of circulatory system in diseases classified elsewhere | 3.214  | 1.198 | 8.620  | <b>0.020</b> | 3.239 | 1.341 | 7.826  | <b>0.009</b> |

Abbreviations: HR, Hazard Ratios; 95% CI, 95% confidential interval

Multi-adjusted: Adjusted for Age, Sex, Education, Ethnicity, Body-Mass-Index, Metabolic equivalent of task-min/week, Smoking Status, Alcohol Intake,

Townsend deprivation index at recruitment, Hypertension, Diabetes Mellitus, Hypercholesterolemia, History of Stroke, Blood pressure-lowering medication, Cholesterol- Lowering Medication, Insulin, *ApoE4*, Pacemaker.

**SM Table 5.3 Association Between Cardiovascular Diseases and Vascular dementia in Age-Restricted Model**

**SM Table 5.3 Association Between Cardiovascular Diseases and Vascular dementia in Age-Restricted Model**

| Traits                                             | Age<65 |              |              | Age>65 |              |              |
|----------------------------------------------------|--------|--------------|--------------|--------|--------------|--------------|
|                                                    | HR     | 95% CI       | P            | HR     | 95% CI       | P            |
| <b>Ischemic heart disorders</b>                    |        |              |              |        |              |              |
| Angina pectoris                                    | 1.837  | 1.437 2.349  | <b>0.000</b> | 1.431  | 1.192 1.717  | <b>0.000</b> |
| Acute myocardial infarction                        | 2.121  | 1.612 2.791  | <b>0.000</b> | 1.744  | 1.420 2.143  | <b>0.000</b> |
| Other acute ischemic heart diseases                | 1.833  | 1.086 3.095  | <b>0.023</b> | 1.733  | 1.189 2.524  | <b>0.004</b> |
| Chronic ischemic heart disease                     | 1.935  | 1.537 2.435  | <b>0.000</b> | 1.692  | 1.430 2.001  | <b>0.000</b> |
| Atherosclerosis                                    | 1.813  | 1.049 3.134  | <b>0.033</b> | 1.711  | 1.157 2.529  | <b>0.007</b> |
| <b>Arrhythmias and conduction disorders</b>        |        |              |              |        |              |              |
| Atrioventricular and left bundle-branch block      | 3.009  | 2.194 4.127  | <b>0.000</b> | 1.767  | 1.389 2.249  | <b>0.000</b> |
| Other conduction disorders                         | 2.286  | 1.489 3.508  | <b>0.000</b> | 1.746  | 1.288 2.369  | <b>0.000</b> |
| Cardiac arrest                                     | 2.479  | 1.225 5.018  | <b>0.012</b> | 1.910  | 1.100 3.317  | <b>0.022</b> |
| Atrial fibrillation and flutter                    | 2.382  | 1.873 3.029  | <b>0.000</b> | 1.916  | 1.617 2.270  | <b>0.000</b> |
| Other cardiac arrhythmias                          | 1.775  | 1.169 2.695  | <b>0.007</b> | 1.381  | 1.014 1.882  | <b>0.041</b> |
| <b>Blood flow-reduction disorders</b>              |        |              |              |        |              |              |
| Cardiomyopathy                                     | 1.568  | 0.698 3.521  | 0.276        | 1.871  | 1.133 3.091  | <b>0.014</b> |
| Heart failure                                      | 2.539  | 1.900 3.393  | <b>0.000</b> | 1.995  | 1.629 2.445  | <b>0.000</b> |
| Hypotension                                        | 4.113  | 3.204 5.280  | <b>0.000</b> | 2.946  | 2.441 3.556  | <b>0.000</b> |
| <b>Embolic and other cerebrovascular disorders</b> |        |              |              |        |              |              |
| Pulmonary embolism                                 | 2.067  | 1.364 3.134  | <b>0.001</b> | 2.141  | 1.602 2.860  | <b>0.000</b> |
| Intracerebral hemorrhage                           | 6.505  | 3.849 10.993 | <b>0.000</b> | 8.281  | 6.062 11.311 | <b>0.000</b> |
| Other nontraumatic intracranial hemorrhage         | 5.163  | 2.424 11.000 | <b>0.000</b> | 3.489  | 1.918 6.344  | <b>0.000</b> |
| Cerebral infarction                                | 7.359  | 5.646 9.592  | <b>0.000</b> | 5.390  | 4.456 6.520  | <b>0.000</b> |

|                                                                                      |        |        |         |              |        |        |        |              |
|--------------------------------------------------------------------------------------|--------|--------|---------|--------------|--------|--------|--------|--------------|
| Stroke, not specified as hemorrhage or infarction                                    | 5.070  | 3.698  | 6.950   | <b>0.000</b> | 3.644  | 2.870  | 4.628  | <b>0.000</b> |
| Occlusion and stenosis of precerebral arteries, not resulting in cerebral infarction | 2.212  | 1.199  | 4.081   | <b>0.011</b> | 2.970  | 2.130  | 4.140  | <b>0.000</b> |
| Other cerebrovascular diseases                                                       | 16.516 | 13.187 | 20.685  | <b>0.000</b> | 8.816  | 7.450  | 10.432 | <b>0.000</b> |
| Cerebrovascular disorders in diseases classified elsewhere                           | 54.820 | 25.409 | 118.274 | <b>0.000</b> | 22.783 | 13.064 | 39.733 | <b>0.000</b> |
| Sequelae of cerebrovascular disease                                                  | 13.439 | 9.949  | 18.154  | <b>0.000</b> | 9.064  | 7.106  | 11.563 | <b>0.000</b> |
| Arterial embolism and thrombosis                                                     | 2.069  | 1.054  | 4.059   | <b>0.035</b> | 1.790  | 1.029  | 3.112  | <b>0.039</b> |
| <b>Rheumatic and valvular disorders</b>                                              |        |        |         |              |        |        |        |              |
| Rheumatic fever with heart involvement                                               | 0.000  | 0.000  | Inf     | 0.989        | 9.734  | 1.366  | 69.374 | <b>0.023</b> |
| Multiple valve diseases                                                              | 1.565  | 0.931  | 2.629   | 0.091        | 1.882  | 1.407  | 2.518  | <b>0.000</b> |
| Nonrheumatic mitral valve disorders                                                  | 2.299  | 1.462  | 3.616   | <b>0.000</b> | 1.083  | 0.730  | 1.606  | 0.691        |
| Nonrheumatic aortic valve disorders                                                  | 2.184  | 1.457  | 3.273   | <b>0.000</b> | 1.117  | 0.803  | 1.554  | 0.511        |
| <b>Other disorders</b>                                                               |        |        |         |              |        |        |        |              |
| Primary hypertension                                                                 | 3.752  | 2.846  | 4.947   | <b>0.000</b> | 2.099  | 1.718  | 2.566  | <b>0.000</b> |
| Hypertensive renal disease                                                           | 2.310  | 1.301  | 4.102   | <b>0.004</b> | 1.796  | 1.082  | 2.982  | <b>0.024</b> |
| Secondary hypertension                                                               | 9.815  | 3.645  | 26.430  | <b>0.000</b> | 2.211  | 0.551  | 8.883  | 0.263        |
| Other diseases of pulmonary vessels                                                  | 7.644  | 1.072  | 54.522  | <b>0.042</b> | 2.917  | 0.410  | 20.760 | 0.285        |
| Other diseases of pericardium                                                        | 2.185  | 1.124  | 4.247   | <b>0.021</b> | 1.401  | 0.771  | 2.547  | 0.269        |
| Acute and subacute endocarditis                                                      | 4.583  | 1.703  | 12.338  | <b>0.003</b> | 1.397  | 0.347  | 5.617  | 0.638        |
| Complications and ill-defined descriptions of heart disease                          | 2.595  | 1.944  | 3.465   | <b>0.000</b> | 1.797  | 1.442  | 2.238  | <b>0.000</b> |
| Phlebitis and thrombophlebitis                                                       | 1.561  | 1.072  | 2.275   | <b>0.020</b> | 1.766  | 1.374  | 2.271  | <b>0.000</b> |
| Varicose veins of lower extremities                                                  | 1.264  | 0.853  | 1.873   | 0.243        | 1.452  | 1.123  | 1.878  | <b>0.005</b> |
| Other disorders of veins                                                             | 2.233  | 1.048  | 4.757   | <b>0.037</b> | 1.789  | 0.956  | 3.349  | 0.069        |
| Other and unspecified disorders of circulatory system                                | 0.944  | 0.132  | 6.750   | 0.954        | 4.378  | 2.244  | 8.541  | <b>0.000</b> |

Abbreviations: HR, Hazard Ratios; 95% CI, 95% confidential interval

Multi-adjusted: Adjusted for Age, Sex, Education, Ethnicity, Body-Mass-Index, Metabolic equivalent of task-min/week, Smoking Status, Alcohol Intake, Townsend deprivation index at recruitment, Hypertension, Diabetes Mellitus, Hypercholesterolemia, History of Stroke, Blood pressure-lowering medication, Cholesterol-Lowering Medication, Insulin, *ApoE4*, Pacemaker.

## Supplementary Materials 6 – Sensitivity Analysis: Sex-Restricted Models

SM Table 6.1 Association Between Cardiovascular Diseases and All-Cause Dementia in Sex-Restricted Model

SM Table 6.1 Association Between Cardiovascular Diseases and All-Cause Dementia in Sex-Restricted Model

| Traits                                                                               | Female |             |              | Male  |              |              |
|--------------------------------------------------------------------------------------|--------|-------------|--------------|-------|--------------|--------------|
|                                                                                      | HR     | 95% CI      | P            | HR    | 95% CI       | P            |
| <b>Ischemic heart disorders</b>                                                      |        |             |              |       |              |              |
| Angina pectoris                                                                      | 1.253  | 1.104 1.422 | <b>0.000</b> | 1.310 | 1.189 1.443  | <b>0.000</b> |
| Acute myocardial infarction                                                          | 1.321  | 1.109 1.573 | <b>0.002</b> | 1.310 | 1.189 1.443  | <b>0.000</b> |
| Other acute ischemic heart diseases                                                  | 1.292  | 0.935 1.784 | 0.121        | 1.378 | 1.113 1.707  | <b>0.003</b> |
| Chronic ischemic heart disease                                                       | 1.468  | 1.310 1.644 | <b>0.000</b> | 1.294 | 1.184 1.414  | <b>0.000</b> |
| Atherosclerosis                                                                      | 1.286  | 0.900 1.837 | 0.167        | 1.247 | 0.985 1.578  | 0.066        |
| <b>Arrhythmias and conduction disorders</b>                                          |        |             |              |       |              |              |
| Atrioventricular and left bundle-branch block                                        | 1.649  | 1.372 1.981 | <b>0.000</b> | 1.532 | 1.343 1.749  | <b>0.000</b> |
| Other conduction disorders                                                           | 1.952  | 1.545 2.467 | <b>0.000</b> | 1.562 | 1.330 1.834  | <b>0.000</b> |
| Cardiac arrest                                                                       | 1.974  | 1.269 3.070 | <b>0.003</b> | 1.473 | 1.081 2.008  | <b>0.014</b> |
| Atrial fibrillation and flutter                                                      | 1.423  | 1.265 1.602 | <b>0.000</b> | 1.518 | 1.383 1.667  | <b>0.000</b> |
| Other cardiac arrhythmias                                                            | 1.398  | 1.147 1.703 | <b>0.001</b> | 1.197 | 1.007 1.423  | <b>0.041</b> |
| <b>Blood flow-reduction disorders</b>                                                |        |             |              |       |              |              |
| Heart failure                                                                        | 1.775  | 1.532 2.056 | <b>0.000</b> | 1.561 | 1.389 1.755  | <b>0.000</b> |
| Hypotension                                                                          | 2.757  | 2.453 3.097 | <b>0.000</b> | 3.026 | 2.738 3.345  | <b>0.000</b> |
| <b>Embolic and other cerebrovascular disorders</b>                                   |        |             |              |       |              |              |
| Pulmonary embolism                                                                   | 1.761  | 1.465 2.118 | <b>0.000</b> | 1.574 | 1.311 1.890  | <b>0.000</b> |
| Subarachnoid hemorrhage                                                              | 3.236  | 1.213 8.633 | <b>0.019</b> | 4.685 | 1.947 11.270 | <b>0.001</b> |
| Intracerebral hemorrhage                                                             | 2.990  | 2.193 4.078 | <b>0.000</b> | 4.587 | 3.681 5.715  | <b>0.000</b> |
| Other nontraumatic intracranial hemorrhage                                           | 4.307  | 2.826 6.564 | <b>0.000</b> | 3.436 | 2.539 4.649  | <b>0.000</b> |
| Cerebral infarction                                                                  | 2.490  | 2.115 2.931 | <b>0.000</b> | 2.623 | 2.306 2.984  | <b>0.000</b> |
| Stroke, not specified as hemorrhage or infarction                                    | 2.017  | 1.649 2.467 | <b>0.000</b> | 2.210 | 1.895 2.577  | <b>0.000</b> |
| Occlusion and stenosis of precerebral arteries, not resulting in cerebral infarction | 1.383  | 0.968 1.977 | 0.075        | 1.713 | 1.363 2.153  | <b>0.000</b> |
| Other cerebrovascular diseases                                                       | 5.161  | 4.594 5.797 | <b>0.000</b> | 5.269 | 4.757 5.836  | <b>0.000</b> |

|                                                                        |       |       |        |              |       |       |        |              |
|------------------------------------------------------------------------|-------|-------|--------|--------------|-------|-------|--------|--------------|
| Cerebrovascular disorders in diseases classified elsewhere             | 9.712 | 5.732 | 16.455 | <b>0.000</b> | 9.464 | 6.190 | 14.469 | <b>0.000</b> |
| Sequelae of cerebrovascular disease                                    | 3.875 | 3.130 | 4.797  | <b>0.000</b> | 5.130 | 4.376 | 6.013  | <b>0.000</b> |
| <b>Rheumatic and valvular disorders</b>                                |       |       |        |              |       |       |        |              |
| Rheumatic chorea                                                       | 4.855 | 0.682 | 34.544 | 0.114        | 4.724 | 0.664 | 33.630 | 0.121        |
| Multiple valve diseases                                                | 1.504 | 1.213 | 1.863  | <b>0.000</b> | 0.989 | 0.801 | 1.221  | 0.919        |
| Nonrheumatic aortic valve disorders                                    | 1.183 | 0.938 | 1.491  | 0.156        | 1.183 | 0.993 | 1.410  | 0.060        |
| <b>Other disorders</b>                                                 |       |       |        |              |       |       |        |              |
| Primary hypertension                                                   | 1.382 | 1.244 | 1.537  | <b>0.000</b> | 1.434 | 1.308 | 1.572  | <b>0.000</b> |
| Hypertensive heart disease                                             | 1.474 | 0.612 | 3.551  | 0.387        | 2.423 | 1.403 | 4.185  | <b>0.002</b> |
| Hypertensive renal disease                                             | 2.038 | 1.453 | 2.859  | <b>0.000</b> | 1.340 | 0.972 | 1.847  | 0.074        |
| Acute and subacute endocarditis                                        | 3.242 | 1.450 | 7.250  | <b>0.004</b> | 1.682 | 0.952 | 2.970  | 0.073        |
| Complications and ill-defined descriptions of heart disease            | 1.421 | 1.205 | 1.677  | <b>0.000</b> | 1.384 | 1.220 | 1.570  | <b>0.000</b> |
| Phlebitis and thrombophlebitis                                         | 1.245 | 1.061 | 1.460  | <b>0.007</b> | 1.557 | 1.338 | 1.813  | <b>0.000</b> |
| Other venous embolism and thrombosis                                   | 1.406 | 0.730 | 2.707  | 0.308        | 1.771 | 1.046 | 2.997  | <b>0.033</b> |
| Oesophageal varices                                                    | 1.178 | 0.560 | 2.476  | 0.666        | 1.977 | 1.256 | 3.109  | <b>0.003</b> |
| Other disorders of veins                                               | 1.119 | 0.683 | 1.832  | 0.656        | 1.850 | 1.329 | 2.576  | <b>0.000</b> |
| Nonspecific lymphadenitis                                              | 3.528 | 1.582 | 7.869  | <b>0.002</b> | 1.283 | 0.320 | 5.135  | 0.725        |
| Other non-infective disorders of lymphatic vessels and lymph nodes     | 1.267 | 0.877 | 1.832  | 0.207        | 1.663 | 1.091 | 2.535  | <b>0.018</b> |
| Other disorders of circulatory system in diseases classified elsewhere | 2.911 | 1.383 | 6.127  | <b>0.005</b> | 2.510 | 1.452 | 4.339  | <b>0.001</b> |

Abbreviations: HR, Hazard Ratios; 95% CI, 95% confidential interval

Multi-adjusted: Adjusted for Age, Sex, Education, Ethnicity, Body-Mass-Index , Metabolic equivalent of task-min/week, Smoking Status, Alcohol Intake, Townsend deprivation index at recruitment, Hypertension, Diabetes Mellitus, Hypercholesterolemia, History of Stroke, Blood pressure-lowering medication, Cholesterol- Lowering Medication, Insulin, *ApoE4*, Pacemaker.

SM Table 6.2 Association Between Cardiovascular Diseases and Alzheimer's Disease in Sex-Restricted Model

SM Table 6.2 Association Between Cardiovascular Diseases and Alzheimer's Disease in Sex-Restricted Model

| Traits                          | Female |        |       | Male         |        |       |       |              |
|---------------------------------|--------|--------|-------|--------------|--------|-------|-------|--------------|
|                                 | HR     | 95% CI | P     | HR           | 95% CI | P     |       |              |
| <b>Ischemic heart disorders</b> |        |        |       |              |        |       |       |              |
| Angina pectoris                 | 1.375  | 1.149  | 1.645 | <b>0.000</b> | 1.178  | 1.004 | 1.382 | <b>0.045</b> |



|                                                                        |       |       |        |              |       |       |        |              |
|------------------------------------------------------------------------|-------|-------|--------|--------------|-------|-------|--------|--------------|
| Chronic ischemic heart disease                                         | 1.457 | 1.236 | 1.718  | <b>0.000</b> | 1.158 | 1.002 | 1.338  | <b>0.047</b> |
| <b>Arrhythmias and conduction disorders</b>                            |       |       |        |              |       |       |        |              |
| Atrioventricular and left bundle-branch block                          | 1.832 | 1.421 | 2.363  | <b>0.000</b> | 1.419 | 1.137 | 1.770  | <b>0.002</b> |
| Other conduction disorders                                             | 1.689 | 1.171 | 2.437  | <b>0.005</b> | 1.485 | 1.135 | 1.941  | <b>0.004</b> |
| Atrial fibrillation and flutter                                        | 1.179 | 0.983 | 1.414  | 0.076        | 1.279 | 1.095 | 1.495  | <b>0.002</b> |
| <b>Blood flow-reduction disorders</b>                                  |       |       |        |              |       |       |        |              |
| Cardiomyopathy in diseases classified elsewhere                        | 4.228 | 0.592 | 30.202 | 0.151        | 3.150 | 0.785 | 12.631 | 0.105        |
| Heart failure                                                          | 1.756 | 1.414 | 2.181  | <b>0.000</b> | 1.403 | 1.150 | 1.711  | <b>0.001</b> |
| Hypotension                                                            | 2.379 | 1.992 | 2.842  | <b>0.000</b> | 2.346 | 1.968 | 2.796  | <b>0.000</b> |
| <b>Embolic and other cerebrovascular disorders</b>                     |       |       |        |              |       |       |        |              |
| Pulmonary embolism                                                     | 1.389 | 1.029 | 1.875  | <b>0.032</b> | 1.537 | 1.138 | 2.075  | <b>0.005</b> |
| Intracerebral hemorrhage                                               | 1.720 | 0.949 | 3.120  | 0.074        | 3.338 | 2.204 | 5.054  | <b>0.000</b> |
| Other nontraumatic intracranial hemorrhage                             | 3.353 | 1.670 | 6.730  | <b>0.001</b> | 2.255 | 1.243 | 4.089  | <b>0.007</b> |
| Cerebral infarction                                                    | 1.235 | 0.894 | 1.706  | 0.201        | 1.471 | 1.129 | 1.918  | <b>0.004</b> |
| Stroke, not specified as hemorrhage or infarction                      | 1.444 | 1.034 | 2.015  | <b>0.031</b> | 1.366 | 1.004 | 1.859  | <b>0.047</b> |
| Other cerebrovascular diseases                                         | 4.141 | 3.453 | 4.965  | <b>0.000</b> | 3.790 | 3.157 | 4.550  | <b>0.000</b> |
| Cerebrovascular disorders in diseases classified elsewhere             | 4.583 | 1.473 | 14.258 | <b>0.009</b> | 6.177 | 2.301 | 16.581 | <b>0.000</b> |
| Sequelae of cerebrovascular disease                                    | 2.094 | 1.373 | 3.194  | <b>0.001</b> | 2.401 | 1.670 | 3.453  | <b>0.000</b> |
| Arterial embolism and thrombosis                                       | 0.570 | 0.183 | 1.776  | 0.333        | 0.369 | 0.138 | 0.986  | <b>0.047</b> |
| <b>Other disorders</b>                                                 |       |       |        |              |       |       |        |              |
| Primary hypertension                                                   | 1.377 | 1.186 | 1.599  | <b>0.000</b> | 1.336 | 1.157 | 1.543  | <b>0.000</b> |
| Hypertensive heart disease                                             | 1.406 | 0.350 | 5.642  | 0.631        | 3.038 | 1.358 | 6.796  | <b>0.007</b> |
| Phlebitis and thrombophlebitis                                         | 1.130 | 0.887 | 1.439  | 0.323        | 1.453 | 1.128 | 1.872  | <b>0.004</b> |
| Oesophageal varices                                                    | 0.732 | 0.183 | 2.936  | 0.660        | 2.716 | 1.405 | 5.251  | <b>0.003</b> |
| Other disorders of veins                                               | 1.561 | 0.835 | 2.917  | 0.163        | 1.847 | 1.066 | 3.198  | <b>0.029</b> |
| Nonspecific lymphadenitis                                              | 3.737 | 1.202 | 11.620 | <b>0.023</b> | 3.540 | 0.883 | 14.196 | 0.074        |
| Other disorders of circulatory system in diseases classified elsewhere | 2.413 | 0.774 | 7.522  | 0.129        | 3.636 | 1.622 | 8.151  | <b>0.002</b> |

Abbreviations: HR, Hazard Ratios; 95% CI, 95% confidential interval

Multi-adjusted: Adjusted for Age, Sex, Education, Ethnicity, Body-Mass-Index, Metabolic equivalent of task-min/week, Smoking Status, Alcohol Intake, Townsend deprivation index at recruitment, Hypertension, Diabetes Mellitus, Hypercholesterolemia, History of Stroke, Blood pressure-lowering medication, Cholesterol-Lowering Medication, Insulin, *ApoE4*, Pacemaker.

SM Table 6.3 Association Between Cardiovascular Diseases and Vascular Dementia in Sex-Restricted Model

SM Table 3 Association Between Cardiovascular Diseases and Vascular Dementia in Sex-Restricted Model

| Traits                                                     | Female |        |        | Male         |        |       |        |              |
|------------------------------------------------------------|--------|--------|--------|--------------|--------|-------|--------|--------------|
|                                                            | HR     | 95% CI | P      | HR           | 95% CI | P     |        |              |
| <b>Ischemic heart disorders</b>                            |        |        |        |              |        |       |        |              |
| Angina pectoris                                            | 1.375  | 1.149  | 1.645  | <b>0.000</b> | 1.178  | 1.004 | 1.382  | <b>0.045</b> |
| Chronic ischemic heart disease                             | 1.457  | 1.236  | 1.718  | <b>0.000</b> | 1.158  | 1.002 | 1.338  | <b>0.047</b> |
| <b>Arrhythmias and conduction disorders</b>                |        |        |        |              |        |       |        |              |
| Atrioventricular and left bundle-branch block              | 1.832  | 1.421  | 2.363  | <b>0.000</b> | 1.419  | 1.137 | 1.770  | <b>0.002</b> |
| Other conduction disorders                                 | 1.689  | 1.171  | 2.437  | <b>0.005</b> | 1.485  | 1.135 | 1.941  | <b>0.004</b> |
| Atrial fibrillation and flutter                            | 1.179  | 0.983  | 1.414  | 0.076        | 1.279  | 1.095 | 1.495  | <b>0.002</b> |
| <b>Blood flow-reduction disorders</b>                      |        |        |        |              |        |       |        |              |
| Cardiomyopathy in diseases classified elsewhere            | 4.228  | 0.592  | 30.202 | 0.151        | 3.150  | 0.785 | 12.631 | 0.105        |
| Heart failure                                              | 1.756  | 1.414  | 2.181  | <b>0.000</b> | 1.403  | 1.150 | 1.711  | <b>0.001</b> |
| Hypotension                                                | 2.379  | 1.992  | 2.842  | <b>0.000</b> | 2.346  | 1.968 | 2.796  | <b>0.000</b> |
| <b>Embolitic and other cerebrovascular disorders</b>       |        |        |        |              |        |       |        |              |
| Pulmonary embolism                                         | 1.389  | 1.029  | 1.875  | <b>0.032</b> | 1.537  | 1.138 | 2.075  | <b>0.005</b> |
| Intracerebral hemorrhage                                   | 1.720  | 0.949  | 3.120  | 0.074        | 3.338  | 2.204 | 5.054  | <b>0.000</b> |
| Other nontraumatic intracranial hemorrhage                 | 3.353  | 1.670  | 6.730  | <b>0.001</b> | 2.255  | 1.243 | 4.089  | <b>0.007</b> |
| Cerebral infarction                                        | 1.235  | 0.894  | 1.706  | 0.201        | 1.471  | 1.129 | 1.918  | <b>0.004</b> |
| Stroke, not specified as hemorrhage or infarction          | 1.444  | 1.034  | 2.015  | <b>0.031</b> | 1.366  | 1.004 | 1.859  | <b>0.047</b> |
| Other cerebrovascular diseases                             | 4.141  | 3.453  | 4.965  | <b>0.000</b> | 3.790  | 3.157 | 4.550  | <b>0.000</b> |
| Cerebrovascular disorders in diseases classified elsewhere | 4.583  | 1.473  | 14.258 | <b>0.009</b> | 6.177  | 2.301 | 16.581 | <b>0.000</b> |
| Sequelae of cerebrovascular disease                        | 2.094  | 1.373  | 3.194  | <b>0.001</b> | 2.401  | 1.670 | 3.453  | <b>0.000</b> |
| Arterial embolism and thrombosis                           | 0.570  | 0.183  | 1.776  | 0.333        | 0.369  | 0.138 | 0.986  | <b>0.047</b> |
| <b>Other disorders</b>                                     |        |        |        |              |        |       |        |              |
| Primary hypertension                                       | 1.377  | 1.186  | 1.599  | <b>0.000</b> | 1.336  | 1.157 | 1.543  | <b>0.000</b> |
| Hypertensive heart disease                                 | 1.406  | 0.350  | 5.642  | 0.631        | 3.038  | 1.358 | 6.796  | <b>0.007</b> |
| Phlebitis and thrombophlebitis                             | 1.130  | 0.887  | 1.439  | 0.323        | 1.453  | 1.128 | 1.872  | <b>0.004</b> |
| Oesophageal varices                                        | 0.732  | 0.183  | 2.936  | 0.660        | 2.716  | 1.405 | 5.251  | <b>0.003</b> |

|                                                                        |       |       |        |              |       |       |        |              |
|------------------------------------------------------------------------|-------|-------|--------|--------------|-------|-------|--------|--------------|
| Other disorders of veins                                               | 1.561 | 0.835 | 2.917  | 0.163        | 1.847 | 1.066 | 3.198  | <b>0.029</b> |
| Nonspecific lymphadenitis                                              | 3.737 | 1.202 | 11.620 | <b>0.023</b> | 3.540 | 0.883 | 14.196 | 0.074        |
| Other non-infective disorders of lymphatic vessels and lymph nodes     | 1.264 | 0.730 | 2.189  | 0.404        | 1.668 | 0.830 | 3.353  | 0.151        |
| Other disorders of circulatory system in diseases classified elsewhere | 2.413 | 0.774 | 7.522  | 0.129        | 3.636 | 1.622 | 8.151  | <b>0.002</b> |

Abbreviations: HR, Hazard Ratios; 95% CI, 95% confidential interval

Multi-adjusted: Adjusted for Age, Sex, Education, Ethnicity, Body-Mass-Index , Metabolic equivalent of task-min/week, Smoking Status, Alcohol Intake, Townsend deprivation index at recruitment, Hypertension, Diabetes Mellitus, Hypercholesterolemia, Hypertension History of Stroke, Blood pressure-lowering medications, Cholesterol- Lowering Medication, Insulin, *ApoE4*, Pacemaker.

## Supplementary Materials 7 - Sensitivity analysis: Follow-up-Restricted Model

SM Table 7.1 Association Between Cardiovascular Diseases and All-cause Dementia in Follow-up-Restricted Model

SM Table 7.1 Association Between Cardiovascular Diseases and All-cause Dementia in Follow-up-Restricted Model

| Traits                                                                               | Follow-up restricted |        |        | P            |
|--------------------------------------------------------------------------------------|----------------------|--------|--------|--------------|
|                                                                                      | HR                   | 95% CI |        |              |
| <b>Ischemic heart disorders</b>                                                      |                      |        |        |              |
| Angina pectoris                                                                      | 1.798                | 1.564  | 2.068  | <b>0.000</b> |
| Acute myocardial infarction                                                          | 1.517                | 1.277  | 1.801  | <b>0.000</b> |
| Other acute ischemic heart diseases                                                  | 1.683                | 1.199  | 2.361  | <b>0.003</b> |
| Chronic ischemic heart disease                                                       | 2.044                | 1.800  | 2.321  | <b>0.000</b> |
| Atherosclerosis                                                                      | 1.016                | 0.641  | 1.609  | 0.947        |
| <b>Arrhythmias and conduction disorders</b>                                          |                      |        |        |              |
| Atrioventricular and left bundle-branch block                                        | 2.741                | 2.258  | 3.327  | <b>0.000</b> |
| Other conduction disorders                                                           | 3.003                | 2.411  | 3.739  | <b>0.000</b> |
| Cardiac arrest                                                                       | 1.344                | 0.908  | 1.989  | 0.140        |
| Atrial fibrillation and flutter                                                      | 1.923                | 1.673  | 2.209  | <b>0.000</b> |
| Other cardiac arrhythmias                                                            | 1.869                | 1.495  | 2.337  | <b>0.000</b> |
| <b>Blood flow-reduction disorders</b>                                                |                      |        |        |              |
| Heart failure                                                                        | 2.141                | 1.807  | 2.536  | <b>0.000</b> |
| Hypotension                                                                          | 4.124                | 3.582  | 4.748  | <b>0.000</b> |
| <b>Embolic and other cerebrovascular disorders</b>                                   |                      |        |        |              |
| Pulmonary embolism                                                                   | 1.996                | 1.586  | 2.512  | <b>0.000</b> |
| Subarachnoid hemorrhage                                                              | 4.299                | 1.608  | 11.489 | <b>0.004</b> |
| Intracerebral hemorrhage                                                             | 4.320                | 3.243  | 5.755  | <b>0.000</b> |
| Other nontraumatic intracranial hemorrhage                                           | 4.520                | 3.138  | 6.511  | <b>0.000</b> |
| Cerebral infarction                                                                  | 3.673                | 3.062  | 4.405  | <b>0.000</b> |
| Stroke, not specified as hemorrhage or infarction                                    | 2.872                | 2.358  | 3.497  | <b>0.000</b> |
| Occlusion and stenosis of precerebral arteries, not resulting in cerebral infarction | 2.104                | 1.436  | 3.082  | <b>0.000</b> |
| Other cerebrovascular diseases                                                       | 7.730                | 6.716  | 8.897  | <b>0.000</b> |
| Cerebrovascular disorders in diseases classified elsewhere                           | 10.307               | 5.782  | 18.375 | <b>0.000</b> |

|                                                                        |       |       |        |              |
|------------------------------------------------------------------------|-------|-------|--------|--------------|
| Sequelae of cerebrovascular disease                                    | 6.819 | 5.495 | 8.461  | <b>0.000</b> |
| <b>Rheumatic and valvular disorders</b>                                |       |       |        |              |
| Rheumatic chorea                                                       | 7.088 | 1.766 | 28.455 | <b>0.006</b> |
| Multiple valve diseases                                                | 1.824 | 1.359 | 2.450  | <b>0.000</b> |
| Nonrheumatic aortic valve disorders                                    | 1.154 | 0.830 | 1.605  | 0.394        |
| <b>Other disorders</b>                                                 |       |       |        |              |
| Primary hypertension                                                   | 2.333 | 2.065 | 2.637  | <b>0.000</b> |
| Hypertensive heart disease                                             | 1.752 | 0.872 | 3.520  | 0.115        |
| Hypertensive renal disease                                             | 1.913 | 1.301 | 2.813  | <b>0.001</b> |
| Acute and subacute endocarditis                                        | 2.048 | 0.916 | 4.580  | 0.081        |
| Complications and ill-defined descriptions of heart disease            | 2.166 | 1.798 | 2.611  | <b>0.000</b> |
| Phlebitis and thrombophlebitis                                         | 1.754 | 1.446 | 2.128  | <b>0.000</b> |
| Other venous embolism and thrombosis                                   | 1.162 | 0.520 | 2.597  | 0.715        |
| Oesophageal varices                                                    | 3.276 | 1.852 | 5.797  | <b>0.000</b> |
| Other disorders of veins                                               | 2.180 | 1.382 | 3.437  | <b>0.001</b> |
| Nonspecific lymphadenitis                                              | 0.741 | 0.104 | 5.269  | 0.765        |
| Other non-infective disorders of lymphatic vessels and lymph nodes     | 1.903 | 1.100 | 3.291  | <b>0.021</b> |
| Other disorders of circulatory system in diseases classified elsewhere | 2.684 | 1.111 | 6.484  | <b>0.028</b> |

Abbreviations: HR, Hazard Ratios; 95% CI, 95% confidential interval

Multi-adjusted: Adjusted for Age, Sex, Education, Ethnicity, Body-Mass-Index , Metabolic equivalent of task-min/week, Smoking Status, Alcohol Intake, Townsend deprivation index at recruitment, Hypertension, Diabetes Mellitus, Hypercholesterolemia, History of Stroke, Blood pressure-lowering medication, Cholesterol- Lowering Medication, Insulin, *ApoE4*, Pacemaker.

### SM Table 7.2 Association Between Cardiovascular Diseases and Alzheimer's disease in Follow-up Restricted Model

#### SM Table 7.2 Association Between Cardiovascular Diseases and Alzheimer's disease in Follow-up Restricted Model

| Traits                          | Follow-up restricted |        |       | <i>P</i>     |
|---------------------------------|----------------------|--------|-------|--------------|
|                                 | HR                   | 95% CI |       |              |
| <b>Ischemic heart disorders</b> |                      |        |       |              |
| Angina pectoris                 | 1.755                | 1.422  | 2.166 | <b>0.000</b> |
| Chronic ischemic heart disease  | 1.979                | 1.634  | 2.397 | <b>0.000</b> |

**Arrhythmias and conduction disorders**

|                                               |       |       |       |              |
|-----------------------------------------------|-------|-------|-------|--------------|
| Atrioventricular and left bundle-branch block | 3.007 | 2.267 | 3.989 | <b>0.000</b> |
| Other conduction disorders                    | 2.455 | 1.694 | 3.558 | <b>0.000</b> |
| Atrial fibrillation and flutter               | 1.630 | 1.312 | 2.026 | <b>0.000</b> |

**Blood flow-reduction disorders**

|                                                 |        |       |        |              |
|-------------------------------------------------|--------|-------|--------|--------------|
| Cardiomyopathy in diseases classified elsewhere | 10.445 | 2.584 | 42.222 | <b>0.001</b> |
| Heart failure                                   | 1.959  | 1.501 | 2.557  | <b>0.000</b> |
| Hypotension                                     | 2.929  | 2.305 | 3.721  | <b>0.000</b> |

**Embolic and other cerebrovascular disorders**

|                                                            |       |       |        |              |
|------------------------------------------------------------|-------|-------|--------|--------------|
| Pulmonary embolism                                         | 1.809 | 1.258 | 2.600  | <b>0.001</b> |
| Intracerebral hemorrhage                                   | 3.794 | 2.366 | 6.086  | <b>0.000</b> |
| Other nontraumatic intracranial hemorrhage                 | 3.025 | 1.560 | 5.866  | <b>0.001</b> |
| Cerebral infarction                                        | 2.113 | 1.474 | 3.029  | <b>0.000</b> |
| Stroke, not specified as hemorrhage or infarction          | 1.951 | 1.380 | 2.758  | <b>0.000</b> |
| Other cerebrovascular diseases                             | 5.797 | 4.585 | 7.330  | <b>0.000</b> |
| Cerebrovascular disorders in diseases classified elsewhere | 6.826 | 1.689 | 27.587 | <b>0.007</b> |
| Sequelae of cerebrovascular disease                        | 4.783 | 3.162 | 7.235  | <b>0.000</b> |
| Arterial embolism and thrombosis                           | 0.515 | 0.128 | 2.070  | 0.350        |

**Other disorders**

|                                                                        |       |       |        |              |
|------------------------------------------------------------------------|-------|-------|--------|--------------|
| Primary hypertension                                                   | 2.161 | 1.806 | 2.585  | <b>0.000</b> |
| Hypertensive heart disease                                             | 1.595 | 0.511 | 4.983  | 0.422        |
| Phlebitis and thrombophlebitis                                         | 1.357 | 0.984 | 1.871  | 0.062        |
| Oesophageal varices                                                    | 3.515 | 1.452 | 8.507  | <b>0.005</b> |
| Other disorders of veins                                               | 3.031 | 1.704 | 5.392  | <b>0.000</b> |
| Nonspecific lymphadenitis                                              | 3.083 | 0.769 | 12.368 | 0.112        |
| Other disorders of circulatory system in diseases classified elsewhere | 3.271 | 0.813 | 13.164 | 0.095        |

Abbreviations: HR, Hazard Ratios; 95% CI, 95% confidential interval

Multi-adjusted: Adjusted for Age, Sex, Education, Ethnicity, Body-Mass-Index, Metabolic equivalent of task-min/week, Smoking Status, Alcohol Intake, Townsend deprivation index at recruitment, Hypertension, Diabetes Mellitus, Hypercholesterolemia, History of Stroke, Blood pressure-lowering medication, Cholesterol-Lowering Medication, Insulin, *ApoE4*, Pacemaker.

SM Table 7.3 Association Between Cardiovascular Diseases and Vascular Dementia in Follow-up Restricted Model

SM Table 7.3 Association Between Cardiovascular Diseases and Vascular Dementia in Follow-up Restricted Model

| Traits                                                                               | Follow-up restricted |        |         | P            |
|--------------------------------------------------------------------------------------|----------------------|--------|---------|--------------|
|                                                                                      | HR                   | 95% CI |         |              |
| <b>Ischemic heart disorders</b>                                                      |                      |        |         |              |
| Angina pectoris                                                                      | 2.314                | 1.637  | 3.271   | <b>0.000</b> |
| Acute myocardial infarction                                                          | 2.430                | 1.660  | 3.559   | <b>0.000</b> |
| Other acute ischemic heart diseases                                                  | 1.665                | 0.732  | 3.787   | 0.224        |
| Chronic ischemic heart disease                                                       | 2.816                | 2.031  | 3.903   | <b>0.000</b> |
| Atherosclerosis                                                                      | 1.318                | 0.524  | 3.316   | 0.558        |
| <b>Arrhythmias and conduction disorders</b>                                          |                      |        |         |              |
| Atrioventricular and left bundle-branch block                                        | 3.362                | 2.099  | 5.387   | <b>0.000</b> |
| Other conduction disorders                                                           | 2.758                | 1.492  | 5.098   | <b>0.001</b> |
| Cardiac arrest                                                                       | 1.476                | 0.599  | 3.637   | 0.398        |
| Atrial fibrillation and flutter                                                      | 2.594                | 1.836  | 3.663   | <b>0.000</b> |
| Other cardiac arrhythmias                                                            | 1.696                | 0.913  | 3.151   | 0.094        |
| <b>Blood flow-reduction disorders</b>                                                |                      |        |         |              |
| Cardiomyopathy                                                                       | 1.340                | 0.419  | 4.287   | 0.622        |
| Heart failure                                                                        | 2.537                | 1.688  | 3.812   | <b>0.000</b> |
| Hypotension                                                                          | 4.221                | 2.904  | 6.134   | <b>0.000</b> |
| <b>Embolic and other cerebrovascular disorders</b>                                   |                      |        |         |              |
| Pulmonary embolism                                                                   | 2.565                | 1.476  | 4.456   | <b>0.001</b> |
| Intracerebral hemorrhage                                                             | 5.296                | 2.568  | 10.921  | <b>0.000</b> |
| Other nontraumatic intracranial hemorrhage                                           | 6.133                | 2.831  | 13.285  | <b>0.000</b> |
| Cerebral infarction                                                                  | 6.313                | 4.191  | 9.509   | <b>0.000</b> |
| Stroke, not specified as hemorrhage or infarction                                    | 5.472                | 3.579  | 8.366   | <b>0.000</b> |
| Occlusion and stenosis of precerebral arteries, not resulting in cerebral infarction | 3.715                | 1.805  | 7.645   | <b>0.000</b> |
| Other cerebrovascular diseases                                                       | 19.237               | 13.806 | 26.804  | <b>0.000</b> |
| Cerebrovascular disorders in diseases classified elsewhere                           | 37.026               | 11.430 | 119.944 | <b>0.000</b> |
| Sequelae of cerebrovascular disease                                                  | 11.855               | 7.347  | 19.128  | <b>0.000</b> |

|                                                             |        |       |        |              |
|-------------------------------------------------------------|--------|-------|--------|--------------|
| Arterial embolism and thrombosis                            | 1.544  | 0.486 | 4.912  | 0.462        |
| <b>Rheumatic and valvular disorders</b>                     |        |       |        |              |
| Rheumatic fever with heart involvement                      | 0.000  | 0.000 | Inf    | 1.000        |
| Multiple valve diseases                                     | 0.000  | 0.000 | Inf    | 1.000        |
| Nonrheumatic mitral valve disorders                         | 2.620  | 1.404 | 4.888  | <b>0.002</b> |
| Nonrheumatic aortic valve disorders                         | 1.340  | 0.625 | 2.877  | 0.452        |
| <b>Other disorders</b>                                      |        |       |        |              |
| Primary hypertension                                        | 3.844  | 2.650 | 5.576  | <b>0.000</b> |
| Hypertensive renal disease                                  | 1.915  | 0.817 | 4.486  | 0.135        |
| Secondary hypertension                                      | 18.910 | 4.635 | 77.151 | <b>0.000</b> |
| Other diseases of pulmonary vessels                         | 17.787 | 4.346 | 72.798 | <b>0.000</b> |
| Other diseases of pericardium                               | 1.611  | 0.512 | 5.072  | 0.415        |
| Acute and subacute endocarditis                             | 1.761  | 0.244 | 12.727 | 0.575        |
| Complications and ill-defined descriptions of heart disease | 3.394  | 2.256 | 5.105  | <b>0.000</b> |
| Phlebitis and thrombophlebitis                              | 2.527  | 1.593 | 4.008  | <b>0.000</b> |
| Varicose veins of lower extremities                         | 1.499  | 0.912 | 2.465  | 0.110        |
| Other disorders of veins                                    | 4.811  | 2.215 | 10.450 | <b>0.000</b> |
| Other and unspecified disorders of circulatory system       | 10.215 | 3.816 | 27.345 | <b>0.000</b> |

Abbreviations: HR, Hazard Ratios; 95% CI, 95% confidential interval

Multi-adjusted: Adjusted for Age, Sex, Education, Ethnicity, Body-Mass-Index , Metabolic equivalent of task-min/week, Smoking Status, Alcohol Intake, Townsend deprivation index at recruitment, Hypertension, Diabetes Mellitus, Hypercholesterolemia, History of Stroke, Blood pressure-lowering medication, Cholesterol- Lowering Medication, Insulin, *ApoE4*, Pacemaker.



## Supplementary Materials 8 - Fine-Gray Models

SM Table 8.1 Association of Cardiovascular Diseases and All-cause Dementia in Fine-Gray Model

SM Table Association of Cardiovascular Diseases and All-cause Dementia in Fine-Gray Model

| Traits                                                                               | No. of competing event | Fine-Gray Model of death |        |        | Fine Gray Model of ACD |        |       |       |              |
|--------------------------------------------------------------------------------------|------------------------|--------------------------|--------|--------|------------------------|--------|-------|-------|--------------|
|                                                                                      |                        | SHR                      | 95% CI | P      | SHR                    | 95% CI | P     |       |              |
| <b>Ischemic heart disorders</b>                                                      |                        |                          |        |        |                        |        |       |       |              |
| Angina pectoris                                                                      | 719                    | 1.117                    | 1.028  | 1.214  | 0.009                  | 1.282  | 1.189 | 1.382 | <b>0.000</b> |
| Acute myocardial infarction                                                          | 711                    | 1.906                    | 1.753  | 2.072  | 0.000                  | 1.244  | 1.133 | 1.365 | <b>0.000</b> |
| Other acute ischemic heart diseases                                                  | 123                    | 1.471                    | 1.228  | 1.761  | 0.000                  | 1.335  | 1.118 | 1.594 | <b>0.001</b> |
| Chronic ischemic heart disease                                                       | 1223                   | 1.576                    | 1.470  | 1.690  | 0.000                  | 1.363  | 1.273 | 1.460 | <b>0.000</b> |
| Atherosclerosis                                                                      | 127                    | 1.616                    | 1.351  | 1.932  | 0.000                  | 1.305  | 1.078 | 1.579 | <b>0.006</b> |
| <b>Arrhythmias and conduction disorders</b>                                          |                        |                          |        |        |                        |        |       |       |              |
| Atrioventricular and left bundle-branch block                                        | 203                    | 0.936                    | 0.810  | 1.080  | 0.365                  | 1.576  | 1.419 | 1.750 | <b>0.000</b> |
| Other conduction disorders                                                           | 118                    | 0.909                    | 0.756  | 1.093  | 0.310                  | 1.660  | 1.456 | 1.892 | <b>0.000</b> |
| Cardiac arrest                                                                       | 275                    | 6.468                    | 5.713  | 7.322  | 0.000                  | 1.591  | 1.237 | 2.046 | <b>0.000</b> |
| Atrial fibrillation and flutter                                                      | 833                    | 1.413                    | 1.306  | 1.528  | 0.000                  | 1.477  | 1.374 | 1.586 | <b>0.000</b> |
| Other cardiac arrhythmias                                                            | 1                      | 1.221                    | 1.061  | 1.404  | 0.005                  | 1.268  | 1.115 | 1.442 | <b>0.000</b> |
| <b>Blood flow-reduction disorders</b>                                                |                        |                          |        |        |                        |        |       |       |              |
| Heart failure                                                                        | 715                    | 2.520                    | 2.315  | 2.742  | 0.000                  | 1.638  | 1.497 | 1.793 | <b>0.000</b> |
| Hypotension                                                                          | 571                    | 2.114                    | 1.934  | 2.312  | 0.000                  | 2.903  | 2.694 | 3.128 | <b>0.000</b> |
| <b>Embolic and other cerebrovascular disorders</b>                                   |                        |                          |        |        |                        |        |       |       |              |
| Pulmonary embolism                                                                   | 531                    | 3.966                    | 3.621  | 4.345  | 0.000                  | 1.674  | 1.473 | 1.902 | <b>0.000</b> |
| Subarachnoid hemorrhage                                                              | 17                     | 6.408                    | 3.980  | 10.319 | 0.000                  | 4.226  | 2.272 | 7.860 | <b>0.000</b> |
| Intracerebral hemorrhage                                                             | 119                    | 4.014                    | 3.342  | 4.821  | 0.000                  | 3.893  | 3.268 | 4.637 | <b>0.000</b> |
| Other nontraumatic intracranial hemorrhage                                           | 67                     | 3.974                    | 3.120  | 5.062  | 0.000                  | 3.669  | 2.881 | 4.673 | <b>0.000</b> |
| Cerebral infarction                                                                  | 282                    | 1.823                    | 1.610  | 2.063  | 0.000                  | 2.588  | 2.342 | 2.859 | <b>0.000</b> |
| Stroke, not specified as hemorrhage or infarction                                    | 364                    | 2.436                    | 2.164  | 2.742  | 0.000                  | 2.177  | 1.932 | 2.453 | <b>0.000</b> |
| Occlusion and stenosis of precerebral arteries, not resulting in cerebral infarction | 52                     | 0.924                    | 0.702  | 1.217  | 0.575                  | 1.604  | 1.327 | 1.939 | <b>0.000</b> |

|                                                                        |      |       |       |       |       |       |       |        |              |
|------------------------------------------------------------------------|------|-------|-------|-------|-------|-------|-------|--------|--------------|
| Other cerebrovascular diseases                                         | 221  | 1.325 | 1.153 | 1.522 | 0.000 | 5.355 | 4.968 | 5.772  | <b>0.000</b> |
| Cerebrovascular disorders in diseases classified elsewhere             | 1    | 0.473 | 0.067 | 3.360 | 0.454 | 9.342 | 6.721 | 12.984 | <b>0.000</b> |
| Sequelae of cerebrovascular disease                                    | 87   | 1.349 | 1.081 | 1.684 | 0.008 | 4.597 | 4.058 | 5.209  | <b>0.000</b> |
| <b>Rheumatic and valvular disorders</b>                                |      |       |       |       |       |       |       |        |              |
| Rheumatic chorea                                                       | 0    | 0.000 | 0.000 | inf   | 0.957 | 3.945 | 0.985 | 15.790 | 0.052        |
| Multiple valve diseases                                                | 110  | 0.931 | 0.770 | 1.126 | 0.462 | 1.197 | 1.033 | 1.387  | <b>0.017</b> |
| Nonrheumatic aortic valve disorders                                    | 167  | 1.180 | 1.009 | 1.379 | 0.038 | 1.166 | 1.016 | 1.338  | <b>0.029</b> |
| <b>Other disorders</b>                                                 |      |       |       |       |       |       |       |        |              |
| Primary hypertension                                                   | 2301 | 0.933 | 0.872 | 0.997 | 0.040 | 1.435 | 1.341 | 1.536  | <b>0.000</b> |
| Hypertensive heart disease                                             | 88   | 7.787 | 6.293 | 9.636 | 0.000 | 2.136 | 1.375 | 3.316  | <b>0.001</b> |
| Hypertensive renal disease                                             | 126  | 2.897 | 2.415 | 3.475 | 0.000 | 1.714 | 1.373 | 2.140  | <b>0.000</b> |
| Acute and subacute endocarditis                                        | 26   | 2.858 | 1.940 | 4.208 | 0.000 | 1.957 | 1.230 | 3.113  | <b>0.005</b> |
| Complications and ill-defined descriptions of heart disease            | 431  | 1.572 | 1.420 | 1.740 | 0.000 | 1.408 | 1.276 | 1.553  | <b>0.000</b> |
| Phlebitis and thrombophlebitis                                         | 511  | 2.233 | 2.036 | 2.450 | 0.000 | 1.407 | 1.263 | 1.568  | <b>0.000</b> |
| Other venous embolism and thrombosis                                   | 70   | 4.485 | 3.540 | 5.681 | 0.000 | 1.532 | 1.017 | 2.308  | <b>0.041</b> |
| Oesophageal varices                                                    | 78   | 4.277 | 3.414 | 5.357 | 0.000 | 1.733 | 1.186 | 2.532  | <b>0.004</b> |
| Other disorders of veins                                               | 50   | 1.651 | 1.248 | 2.183 | 0.000 | 1.532 | 1.168 | 2.010  | <b>0.002</b> |
| Nonspecific lymphadenitis                                              | 5    | 1.116 | 0.464 | 2.681 | 0.807 | 2.386 | 1.192 | 4.775  | <b>0.014</b> |
| Other non-infective disorders of lymphatic vessels and lymph nodes     | 104  | 3.032 | 2.492 | 3.688 | 0.000 | 1.409 | 1.074 | 1.850  | <b>0.013</b> |
| Other disorders of circulatory system in diseases classified elsewhere | 46   | 4.612 | 3.443 | 6.177 | 0.000 | 2.780 | 1.808 | 4.273  | <b>0.000</b> |

Abbreviations: ACD, All-cause dementia; HR, Hazard Ratios; 95% CI, 95% confidential interval

Multi-adjusted: Adjusted for Age, Sex, Education, Ethnicity, Body-Mass-Index , Metabolic equivalent of task-min/week, Smoking Status, Alcohol Intake, Townsend deprivation index at recruitment, Hypertension, Diabetes Mellitus, Hypercholesterolemia, Hypertension History of Stroke, Blood pressure-lowering medications, Cholesterol- Lowering Medication, Insulin, *ApoE4*, Pacemaker.

SM Table 8.2 Association of Cardiovascular Diseases and Alzheimer's Disease in Fine-Gray Model

SM Table 8.2 Association of Cardiovascular Diseases and Alzheimer's Disease in Fine-Gray Model

| Traits                                                     | No. of competing event | Fine-Gray Model of death |        |       | Fine Gray Model of AD |        |       |        |              |
|------------------------------------------------------------|------------------------|--------------------------|--------|-------|-----------------------|--------|-------|--------|--------------|
|                                                            |                        | SHR                      | 95% CI | P     | SHR                   | 95% CI | P     |        |              |
| <b>Ischemic heart disorders</b>                            |                        |                          |        |       |                       |        |       |        |              |
| Angina pectoris                                            | 719                    | 1.124                    | 1.034  | 1.221 | 0.006                 | 1.738  | 1.404 | 2.153  | <b>0.000</b> |
| Chronic ischemic heart disease                             | 1223                   | 1.911                    | 1.758  | 2.078 | 0.000                 | 1.899  | 1.557 | 2.316  | <b>0.000</b> |
| <b>Arrhythmias and conduction disorders</b>                |                        |                          |        |       |                       |        |       |        |              |
| Atrioventricular and left bundle-branch block              | 203                    | 0.948                    | 0.821  | 1.095 | 0.470                 | 1.936  | 1.439 | 2.603  | <b>0.000</b> |
| Other conduction disorders                                 | 118                    | 0.923                    | 0.767  | 1.110 | 0.396                 | 1.938  | 1.331 | 2.820  | <b>0.001</b> |
| Atrial fibrillation and flutter                            | 833                    | 1.428                    | 1.320  | 1.544 | 0.000                 | 1.537  | 1.237 | 1.909  | <b>0.000</b> |
| <b>Blood flow-reduction disorders</b>                      |                        |                          |        |       |                       |        |       |        |              |
| Cardiomyopathy in diseases classified elsewhere            | 7                      | 4.477                    | 2.133  | 9.400 | 0.000                 | 4.470  | 0.627 | 31.872 | 0.135        |
| Heart failure                                              | 715                    | 2.547                    | 2.340  | 2.771 | 0.000                 | 2.551  | 2.003 | 3.250  | <b>0.000</b> |
| Hypotension                                                | 571                    | 2.174                    | 1.988  | 2.377 | 0.000                 | 3.490  | 2.807 | 4.338  | <b>0.000</b> |
| <b>Embolic and other cerebrovascular disorders</b>         |                        |                          |        |       |                       |        |       |        |              |
| Pulmonary embolism                                         | 531                    | 3.988                    | 3.641  | 4.369 | 0.000                 | 1.865  | 1.280 | 2.718  | <b>0.001</b> |
| Intracerebral hemorrhage                                   | 119                    | 4.170                    | 3.472  | 5.009 | 0.000                 | 3.910  | 2.295 | 6.663  | <b>0.000</b> |
| Other nontraumatic intracranial hemorrhage                 | 67                     | 4.023                    | 3.158  | 5.124 | 0.000                 | 6.267  | 3.603 | 10.898 | <b>0.000</b> |
| Cerebral infarction                                        | 282                    | 1.876                    | 1.657  | 2.124 | 0.000                 | 2.009  | 1.434 | 2.814  | <b>0.000</b> |
| Stroke, not specified as hemorrhage or infarction          | 364                    | 2.469                    | 2.193  | 2.779 | 0.000                 | 1.943  | 1.329 | 2.841  | <b>0.001</b> |
| Other cerebrovascular diseases                             | 221                    | 1.412                    | 1.229  | 1.622 | 0.000                 | 4.758  | 3.741 | 6.051  | <b>0.000</b> |
| Cerebrovascular disorders in diseases classified elsewhere | 1                      | 0.626                    | 0.088  | 4.449 | 0.640                 | 6.027  | 1.499 | 24.233 | <b>0.011</b> |
| Sequelae of cerebrovascular disease                        | 87                     | 1.412                    | 1.130  | 1.763 | 0.002                 | 4.171  | 2.782 | 6.254  | <b>0.000</b> |
| Arterial embolism and thrombosis                           | 97                     | 2.294                    | 1.872  | 2.810 | 0.000                 | 0.672  | 0.215 | 2.096  | 0.493        |
| <b>Other disorders</b>                                     |                        |                          |        |       |                       |        |       |        |              |
| Primary hypertension                                       | 2301                   | 0.939                    | 0.878  | 1.004 | 0.064                 | 1.809  | 1.467 | 2.231  | <b>0.000</b> |
| Hypertensive heart disease                                 | 88                     | 7.736                    | 6.251  | 9.572 | 0.000                 | 6.470  | 2.882 | 14.526 | <b>0.000</b> |
| Phlebitis and thrombophlebitis                             | 511                    | 2.249                    | 2.050  | 2.467 | 0.000                 | 1.615  | 1.179 | 2.211  | <b>0.003</b> |

|                                                                        |    |       |       |       |       |       |       |        |       |
|------------------------------------------------------------------------|----|-------|-------|-------|-------|-------|-------|--------|-------|
| Oesophageal varices                                                    | 78 | 4.276 | 3.414 | 5.357 | 0.000 | 1.265 | 0.315 | 5.087  | 0.740 |
| Other disorders of veins                                               | 50 | 1.680 | 1.271 | 2.223 | 0.000 | 1.634 | 0.728 | 3.667  | 0.234 |
| Nonspecific lymphadenitis                                              | 5  | 1.129 | 0.470 | 2.714 | 0.786 | 0.000 | 0.000 | Inf    | 0.984 |
| Other disorders of circulatory system in diseases classified elsewhere | 46 | 4.621 | 3.450 | 6.190 | 0.000 | 2.574 | 0.639 | 10.363 | 0.183 |

Abbreviations: AD, Alzheimer's disease; HR, Hazard Ratios; 95% CI, 95% confidential interval

Multi-adjusted: Adjusted for Age, Sex, Education, Ethnicity, Body-Mass-Index, Metabolic equivalent of task-min/week, Smoking Status, Alcohol Intake, Townsend deprivation index at recruitment, Hypertension, Diabetes Mellitus, Hypercholesterolemia, History of Stroke, Blood pressure-lowering medication, Cholesterol-Lowering Medication, Insulin, *ApoE4*, Pacemaker.

**SM Table 8.3 Association of Cardiovascular Diseases and Vascular Dementia in Fine-Gray Model**

**SM Table 8.3 Association of Cardiovascular Diseases and Vascular Dementia in Fine-Gray Model**

| Traits                                        | No. of competing event | Fine-Gray Model of death |        |       | Fine Gray Model of VaD |        |       |       |              |
|-----------------------------------------------|------------------------|--------------------------|--------|-------|------------------------|--------|-------|-------|--------------|
|                                               |                        | SHR                      | 95% CI | P     | SHR                    | 95% CI | P     |       |              |
| <b>Ischemic heart disorders</b>               |                        |                          |        |       |                        |        |       |       |              |
| Angina pectoris                               | 719                    | 1.556                    | 1.239  | 1.953 | 0.000                  | 1.738  | 1.404 | 2.153 | <b>0.000</b> |
| Acute myocardial infarction                   | 711                    | 1.970                    | 1.533  | 2.531 | 0.000                  | 1.810  | 1.409 | 2.324 | <b>0.000</b> |
| Other acute ischemic heart diseases           | 123                    | 2.082                    | 1.337  | 3.242 | 0.001                  | 2.388  | 1.579 | 3.613 | <b>0.000</b> |
| Chronic ischemic heart disease                | 1223                   | 1.774                    | 1.436  | 2.192 | 0.000                  | 1.899  | 1.557 | 2.316 | <b>0.000</b> |
| Atherosclerosis                               | 127                    | 1.907                    | 1.193  | 3.047 | 0.007                  | 0.985  | 0.507 | 1.914 | 0.964        |
| <b>Arrhythmias and conduction disorders</b>   |                        |                          |        |       |                        |        |       |       |              |
| Atrioventricular and left bundle-branch block | 203                    | 2.308                    | 1.732  | 3.075 | 0.000                  | 1.936  | 1.439 | 2.603 | <b>0.000</b> |
| Other conduction disorders                    | 118                    | 2.161                    | 1.504  | 3.105 | 0.000                  | 1.938  | 1.331 | 2.820 | <b>0.001</b> |
| Cardiac arrest                                | 275                    | 2.526                    | 1.383  | 4.613 | 0.003                  | 2.010  | 1.036 | 3.899 | <b>0.039</b> |
| Atrial fibrillation and flutter               | 833                    | 1.962                    | 1.577  | 2.442 | 0.000                  | 1.537  | 1.237 | 1.909 | <b>0.000</b> |
| Other cardiac arrhythmias                     | 215                    | 1.358                    | 0.907  | 2.035 | 0.138                  | 1.226  | 0.825 | 1.821 | 0.314        |
| <b>Blood flow-reduction disorders</b>         |                        |                          |        |       |                        |        |       |       |              |
| Cardiomyopathy                                | 90                     | 1.589                    | 0.785  | 3.215 | 0.198                  | 1.596  | 0.820 | 3.105 | 0.169        |
| Heart failure                                 | 715                    | 2.475                    | 1.928  | 3.177 | 0.000                  | 2.551  | 2.003 | 3.250 | <b>0.000</b> |
| Hypotension                                   | 571                    | 3.808                    | 3.037  | 4.774 | 0.000                  | 3.490  | 2.807 | 4.338 | <b>0.000</b> |

**Embollic and other cerebrovascular disorders**

|                                                                                      |     |        |       |        |       |       |       |        |              |
|--------------------------------------------------------------------------------------|-----|--------|-------|--------|-------|-------|-------|--------|--------------|
| Pulmonary embolism                                                                   | 531 | 2.889  | 2.074 | 4.025  | 0.000 | 1.865 | 1.280 | 2.718  | <b>0.001</b> |
| Intracerebral hemorrhage                                                             | 119 | 6.523  | 4.186 | 10.163 | 0.000 | 3.910 | 2.295 | 6.663  | <b>0.000</b> |
| Other nontraumatic intracranial hemorrhage                                           | 67  | 5.101  | 2.715 | 9.584  | 0.000 | 6.267 | 3.603 | 10.898 | <b>0.000</b> |
| Cerebral infarction                                                                  | 282 | 4.804  | 3.716 | 6.211  | 0.000 | 2.009 | 1.434 | 2.814  | <b>0.000</b> |
| Stroke, not specified as hemorrhage or infarction                                    | 364 | 5.266  | 3.999 | 6.934  | 0.000 | 1.943 | 1.329 | 2.841  | <b>0.001</b> |
| Occlusion and stenosis of precerebral arteries, not resulting in cerebral infarction | 52  | 2.504  | 1.579 | 3.972  | 0.000 | 0.636 | 0.262 | 1.543  | 0.317        |
| Other cerebrovascular diseases                                                       | 221 | 11.659 | 9.450 | 14.384 | 0.000 | 4.758 | 3.741 | 6.051  | <b>0.000</b> |
| Cerebrovascular disorders in diseases classified elsewhere                           | 1   | 16.521 | 6.138 | 44.469 | 0.000 | 6.027 | 1.499 | 24.233 | <b>0.011</b> |
| Sequelae of cerebrovascular disease                                                  | 87  | 10.860 | 8.098 | 14.563 | 0.000 | 4.171 | 2.782 | 6.254  | <b>0.000</b> |
| Arterial embolism and thrombosis                                                     | 87  | 2.456  | 1.375 | 4.389  | 0.002 | 0.672 | 0.215 | 2.096  | 0.493        |

**Rheumatic and valvular disorders**

|                                        |     |        |       |         |       |       |       |       |       |
|----------------------------------------|-----|--------|-------|---------|-------|-------|-------|-------|-------|
| Rheumatic fever with heart involvement | 0   | 21.756 | 3.051 | 155.147 | 0.002 | 0.000 | 0.000 | Inf   | 0.990 |
| Multiple valve diseases                | 110 | 2.023  | 1.390 | 2.943   | 0.000 | 1.126 | 0.710 | 1.787 | 0.613 |
| Nonrheumatic mitral valve disorders    | 148 | 1.426  | 0.898 | 2.265   | 0.132 | 1.463 | 0.952 | 2.248 | 0.083 |
| Nonrheumatic aortic valve disorders    | 167 | 1.056  | 0.678 | 1.644   | 0.811 | 0.841 | 0.517 | 1.368 | 0.485 |

**Other disorders**

|                                                             |      |       |       |        |       |       |       |        |              |
|-------------------------------------------------------------|------|-------|-------|--------|-------|-------|-------|--------|--------------|
| Primary hypertension                                        | 2301 | 2.560 | 1.986 | 3.301  | 0.000 | 1.809 | 1.467 | 2.231  | <b>0.000</b> |
| Hypertensive renal disease                                  | 126  | 2.936 | 1.795 | 4.802  | 0.000 | 2.015 | 1.063 | 3.819  | <b>0.032</b> |
| Secondary hypertension                                      | 14   | 8.977 | 3.704 | 21.756 | 0.000 | 3.617 | 0.900 | 14.541 | 0.070        |
| Other diseases of pulmonary vessels                         | 7    | 9.622 | 2.394 | 38.672 | 0.001 | 4.486 | 0.630 | 31.928 | 0.134        |
| Other diseases of pericardium                               | 113  | 1.004 | 0.415 | 2.427  | 0.994 | 2.111 | 1.160 | 3.843  | <b>0.015</b> |
| Acute and subacute endocarditis                             | 26   | 2.145 | 0.533 | 8.638  | 0.283 | 0.983 | 0.138 | 7.019  | 0.987        |
| Complications and ill-defined descriptions of heart disease | 431  | 2.170 | 1.659 | 2.837  | 0.000 | 1.269 | 0.925 | 1.740  | 0.139        |
| Phlebitis and thrombophlebitis                              | 511  | 2.103 | 1.549 | 2.855  | 0.000 | 1.615 | 1.179 | 2.211  | <b>0.003</b> |
| Varicose veins of lower extremities                         | 358  | 1.513 | 1.091 | 2.099  | 0.013 | 1.465 | 1.084 | 1.981  | <b>0.013</b> |
| Other disorders of veins                                    | 50   | 2.669 | 1.373 | 5.188  | 0.004 | 1.634 | 0.728 | 3.667  | 0.234        |
| Other and unspecified disorders of circulatory system       | 26   | 4.967 | 2.311 | 10.679 | 0.000 | 2.974 | 1.100 | 8.039  | <b>0.032</b> |

---

Abbreviations: VaD, Vascular dementia; HR, Hazard Ratios; 95% CI, 95% confidential interval

Multi-adjusted: Adjusted for Age, Sex, Education, Ethnicity, Body-Mass-Index , Metabolic equivalent of task-min/week, Smoking Status, Alcohol Intake, Townsend deprivation index at recruitment, Hypertension, Diabetes Mellitus, Hypercholesterolemia, History of Stroke, Blood pressure-lowering medication, Cholesterol- Lowering Medication, Insulin, *ApoE4*, Pacemaker.

## Supplementary Materials 9 – Analysis of Post-Stroke Dementia

SM Table 9.1 Cox Regression Model of Association Between Cardiovascular Diseases and Post-Stroke Dementia

SM Table 9.1 Cox Regression Model of Association Between Cardiovascular Diseases and Post-Stroke Dementia

| Traits                                                                               | ACD   |        |       | AD           |        |       | VaD   |              |       |       |       |              |
|--------------------------------------------------------------------------------------|-------|--------|-------|--------------|--------|-------|-------|--------------|-------|-------|-------|--------------|
|                                                                                      | HR    | 95% CI | P     | HR           | 95% CI | P     | HR    | 95% CI       | P     |       |       |              |
| <b>Ischemic heart disorders</b>                                                      |       |        |       |              |        |       |       |              |       |       |       |              |
| Angina pectoris                                                                      | 1.042 | 0.878  | 1.236 | 0.638        | 1.069  | 0.765 | 1.495 | 0.696        | 1.059 | 0.825 | 1.359 | 0.653        |
| Acute myocardial infarction                                                          | 1.204 | 0.995  | 1.456 | 0.056        | 1.015  | 0.681 | 1.514 | 0.940        | 1.498 | 1.152 | 1.948 | <b>0.003</b> |
| Subsequent myocardial infarction                                                     | 0.839 | 0.397  | 1.775 | 0.647        | 1.643  | 0.518 | 5.205 | 0.399        | 0.925 | 0.343 | 2.496 | 0.877        |
| Certain current complications following acute myocardial infarction                  | 0.000 | 0.000  | Inf   | 0.987        | 0.000  | 0.000 | Inf   | 0.991        | 0.000 | 0.000 | Inf   | 0.990        |
| Other acute ischemic heart diseases                                                  | 1.342 | 0.965  | 1.867 | 0.080        | 1.183  | 0.600 | 2.333 | 0.628        | 1.199 | 0.732 | 1.962 | 0.471        |
| Chronic ischemic heart disease                                                       | 1.170 | 1.001  | 1.368 | <b>0.049</b> | 0.907  | 0.661 | 1.244 | 0.543        | 1.239 | 0.985 | 1.558 | 0.067        |
| Atherosclerosis                                                                      | 1.277 | 0.921  | 1.770 | 0.143        | 0.655  | 0.268 | 1.601 | 0.353        | 1.741 | 1.150 | 2.638 | <b>0.009</b> |
| <b>Arrhythmias and conduction disorders</b>                                          |       |        |       |              |        |       |       |              |       |       |       |              |
| Atrioventricular and left bundle-branch block                                        | 1.594 | 1.296  | 1.962 | <b>0.000</b> | 1.444  | 0.950 | 2.194 | 0.085        | 1.627 | 1.205 | 2.197 | <b>0.001</b> |
| Other conduction disorders                                                           | 1.170 | 0.873  | 1.568 | 0.294        | 0.987  | 0.531 | 1.834 | 0.966        | 0.911 | 0.570 | 1.458 | 0.699        |
| Cardiac arrest                                                                       | 0.956 | 0.551  | 1.660 | 0.874        | 0.000  | 0.000 | Inf   | 0.988        | 1.255 | 0.619 | 2.546 | 0.529        |
| Paroxysmal tachycardia                                                               | 0.795 | 0.527  | 1.199 | 0.273        | 0.923  | 0.431 | 1.978 | 0.837        | 0.798 | 0.435 | 1.463 | 0.465        |
| Atrial fibrillation and flutter                                                      | 1.373 | 1.178  | 1.599 | <b>0.000</b> | 0.794  | 0.574 | 1.098 | 0.163        | 1.469 | 1.172 | 1.842 | <b>0.001</b> |
| Other cardiac arrhythmias                                                            | 1.014 | 0.756  | 1.358 | 0.928        | 0.855  | 0.460 | 1.587 | 0.619        | 1.043 | 0.678 | 1.606 | 0.847        |
| <b>Blood flow-reduction disorders</b>                                                |       |        |       |              |        |       |       |              |       |       |       |              |
| Cardiomyopathy                                                                       | 0.925 | 0.542  | 1.579 | 0.776        | 0.808  | 0.255 | 2.557 | 0.717        | 1.275 | 0.627 | 2.593 | 0.502        |
| Cardiomyopathy in diseases classified elsewhere                                      | 0.000 | 0.000  | Inf   | 0.986        | 0.000  | 0.000 | Inf   | 0.991        | 0.000 | 0.000 | Inf   | 0.991        |
| Heart failure                                                                        | 1.439 | 1.203  | 1.720 | <b>0.000</b> | 1.096  | 0.752 | 1.597 | 0.633        | 1.473 | 1.136 | 1.912 | <b>0.004</b> |
| Hypotension                                                                          | 2.030 | 1.713  | 2.405 | <b>0.000</b> | 1.519  | 1.057 | 2.182 | <b>0.024</b> | 2.014 | 1.567 | 2.587 | <b>0.000</b> |
| <b>Embolic and other cerebrovascular disorders</b>                                   |       |        |       |              |        |       |       |              |       |       |       |              |
| Pulmonary embolism                                                                   | 1.436 | 1.094  | 1.885 | <b>0.009</b> | 1.703  | 1.030 | 2.816 | <b>0.038</b> | 1.212 | 0.784 | 1.872 | 0.387        |
| Occlusion and stenosis of precerebral arteries, not resulting in cerebral infarction | 0.999 | 0.777  | 1.284 | 0.993        | 0.435  | 0.214 | 0.886 | <b>0.022</b> | 1.372 | 0.987 | 1.908 | 0.060        |
| Occlusion and stenosis of cerebral arteries, not resulting in cerebral infarction    | 0.821 | 0.306  | 2.198 | 0.694        | 0.778  | 0.108 | 5.597 | 0.803        | 0.441 | 0.062 | 3.150 | 0.415        |
| Other cerebrovascular diseases                                                       | 2.445 | 2.109  | 2.834 | <b>0.000</b> | 1.647  | 1.220 | 2.223 | <b>0.001</b> | 3.197 | 2.566 | 3.982 | <b>0.000</b> |

|                                                                         |       |       |       |              |       |       |       |              |       |       |        |              |
|-------------------------------------------------------------------------|-------|-------|-------|--------------|-------|-------|-------|--------------|-------|-------|--------|--------------|
| Cerebrovascular disorders in diseases classified elsewhere              | 4.174 | 2.487 | 7.005 | <b>0.000</b> | 2.137 | 0.525 | 8.692 | 0.289        | 7.190 | 3.786 | 13.655 | <b>0.000</b> |
| Sequelae of cerebrovascular disease                                     | 2.449 | 2.095 | 2.863 | <b>0.000</b> | 1.538 | 1.092 | 2.166 | <b>0.014</b> | 3.310 | 2.648 | 4.138  | <b>0.000</b> |
| Arterial embolism and thrombosis                                        | 1.110 | 0.693 | 1.778 | 0.663        | 0.249 | 0.035 | 1.785 | 0.167        | 1.418 | 0.772 | 2.602  | 0.260        |
| <b>Rheumatic and valvular disorders</b>                                 |       |       |       |              |       |       |       |              |       |       |        |              |
| Rheumatic fever without mention of heart involvement                    | 0.865 | 0.358 | 2.089 | 0.747        | 0.000 | 0.000 | Inf   | 0.993        | 0.788 | 0.195 | 3.176  | 0.737        |
| Rheumatic fever with heart involvement                                  | 0.000 | 0.000 | Inf   | 0.988        | 0.000 | 0.000 | Inf   | 0.994        | 0.000 | 0.000 | Inf    | 0.989        |
| Rheumatic chorea                                                        | 0.000 | 0.000 | Inf   | 0.991        | 0.000 | 0.000 | Inf   | 0.995        | 0.000 | 0.000 | Inf    | 0.994        |
| Rheumatic mitral valve diseases                                         | 1.420 | 0.759 | 2.660 | 0.273        | 0.514 | 0.072 | 3.682 | 0.507        | 0.326 | 0.046 | 2.325  | 0.263        |
| Rheumatic aortic valve diseases                                         | 1.040 | 0.146 | 7.435 | 0.969        | 0.000 | 0.000 | Inf   | 0.992        | 0.000 | 0.000 | Inf    | 0.990        |
| Rheumatic tricuspid valve diseases                                      | 0.672 | 0.333 | 1.354 | 0.266        | 0.595 | 0.146 | 2.418 | 0.468        | 0.953 | 0.392 | 2.320  | 0.916        |
| Multiple valve diseases                                                 | 1.441 | 1.112 | 1.866 | <b>0.006</b> | 0.776 | 0.409 | 1.474 | 0.439        | 1.744 | 1.218 | 2.496  | <b>0.002</b> |
| Other rheumatic heart diseases                                          | 1.082 | 0.151 | 7.731 | 0.937        | 0.000 | 0.000 | Inf   | 0.993        | 0.000 | 0.000 | Inf    | 0.989        |
| Pulmonary valve disorders                                               | 1.598 | 0.757 | 3.371 | 0.219        | 1.684 | 0.415 | 6.831 | 0.466        | 1.505 | 0.481 | 4.705  | 0.482        |
| Endocarditis, valve unspecified                                         | 1.306 | 0.649 | 2.627 | 0.455        | 0.625 | 0.087 | 4.476 | 0.639        | 2.133 | 0.946 | 4.809  | 0.068        |
| Endocarditis and heart valve disorders in diseases classified elsewhere | 0.000 | 0.000 | Inf   | 0.985        | 0.000 | 0.000 | Inf   | 0.993        | 0.000 | 0.000 | Inf    | 0.991        |
| Nonrheumatic mitral valve disorders                                     | 1.042 | 0.765 | 1.419 | 0.796        | 0.978 | 0.530 | 1.803 | 0.943        | 1.092 | 0.694 | 1.719  | 0.703        |
| Nonrheumatic aortic valve disorders                                     | 1.265 | 0.978 | 1.635 | 0.073        | 0.578 | 0.284 | 1.177 | 0.131        | 1.234 | 0.840 | 1.811  | 0.284        |
| Nonrheumatic tricuspid valve disorders                                  | 0.969 | 0.362 | 2.594 | 0.950        | 0.768 | 0.107 | 5.535 | 0.794        | 1.757 | 0.562 | 5.489  | 0.332        |
| <b>Other disorders</b>                                                  |       |       |       |              |       |       |       |              |       |       |        |              |
| Primary hypertension                                                    | 1.035 | 0.850 | 1.261 | 0.731        | 0.778 | 0.536 | 1.127 | 0.184        | 1.578 | 1.132 | 2.199  | <b>0.007</b> |
| Hypertensive heart disease                                              | 1.283 | 0.479 | 3.437 | 0.620        | 1.204 | 0.167 | 8.669 | 0.854        | 0.589 | 0.082 | 4.204  | 0.597        |
| Hypertensive renal disease                                              | 1.127 | 0.732 | 1.733 | 0.587        | 1.707 | 0.830 | 3.513 | 0.146        | 1.329 | 0.754 | 2.343  | 0.326        |
| Hypertensive heart and renal disease                                    | 2.680 | 0.856 | 8.392 | 0.090        | 0.000 | 0.000 | Inf   | 0.991        | 2.974 | 0.732 | 12.090 | 0.128        |
| Secondary hypertension                                                  | 1.351 | 0.336 | 5.425 | 0.672        | 0.000 | 0.000 | Inf   | 0.991        | 2.916 | 0.722 | 11.779 | 0.133        |
| Other pulmonary heart diseases                                          | 0.754 | 0.434 | 1.308 | 0.315        | 0.203 | 0.028 | 1.451 | 0.112        | 0.949 | 0.468 | 1.925  | 0.884        |
| Other diseases of pulmonary vessels                                     | 0.000 | 0.000 | Inf   | 0.987        | 0.000 | 0.000 | Inf   | 0.993        | 3.457 | 0.484 | 24.707 | 0.216        |
| Acute pericarditis                                                      | 0.000 | 0.000 | Inf   | 0.986        | 0.000 | 0.000 | Inf   | 0.992        | 0.000 | 0.000 | Inf    | 0.991        |
| Other diseases of pericardium                                           | 1.250 | 0.772 | 2.024 | 0.365        | 1.967 | 0.921 | 4.202 | 0.081        | 1.503 | 0.774 | 2.918  | 0.229        |
| Pericarditis in diseases classified elsewhere                           | 0.000 | 0.000 | Inf   | 0.986        | 0.000 | 0.000 | Inf   | 0.994        | 0.000 | 0.000 | Inf    | 0.991        |
| Acute and subacute endocarditis                                         | 1.670 | 0.789 | 3.533 | 0.180        | 0.000 | 0.000 | Inf   | 0.990        | 1.017 | 0.252 | 4.109  | 0.981        |
| Acute myocarditis                                                       | 0.000 | 0.000 | Inf   | 0.987        | 0.000 | 0.000 | Inf   | 0.994        | 0.000 | 0.000 | Inf    | 0.991        |
| Myocarditis in diseases classified elsewhere                            | 0.000 | 0.000 | Inf   | 0.987        | 0.000 | 0.000 | Inf   | 0.994        | 0.000 | 0.000 | Inf    | 0.991        |



|                                                                                    |       |       |        |              |        |       |        |              |        |       |        |              |
|------------------------------------------------------------------------------------|-------|-------|--------|--------------|--------|-------|--------|--------------|--------|-------|--------|--------------|
| Complications and ill-defined descriptions of heart disease                        | 1.308 | 1.080 | 1.584  | <b>0.006</b> | 0.883  | 0.572 | 1.362  | 0.573        | 1.506  | 1.150 | 1.972  | <b>0.003</b> |
| Other heart disorders in diseases classified elsewhere                             | NA    | NA    | NA     | NA           | NA     | NA    | NA     | NA           | NA     | NA    | NA     | NA           |
| Other disorders of arteries and arterioles                                         | 0.926 | 0.625 | 1.372  | 0.701        | 0.422  | 0.135 | 1.326  | 0.140        | 1.051  | 0.613 | 1.803  | 0.855        |
| Diseases of capillaries                                                            | 0.983 | 0.440 | 2.197  | 0.966        | 0.663  | 0.093 | 4.737  | 0.682        | 0.391  | 0.055 | 2.788  | 0.349        |
| Disorders of arteries, arterioles and capillaries in diseases classified elsewhere | 0.678 | 0.094 | 4.873  | 0.699        | 2.862  | 0.384 | 21.314 | 0.305        | 0.000  | 0.000 | Inf    | 0.988        |
| Phlebitis and thrombophlebitis                                                     | 1.398 | 1.103 | 1.772  | <b>0.006</b> | 1.414  | 0.877 | 2.280  | 0.156        | 0.000  | 0.000 | Inf    | 0.988        |
| Portal vein thrombosis                                                             | 5.337 | 1.326 | 21.476 | <b>0.018</b> | 12.151 | 1.678 | 87.962 | <b>0.013</b> | 5.804  | 0.807 | 41.742 | 0.081        |
| Other venous embolism and thrombosis                                               | 0.811 | 0.261 | 2.527  | 0.718        | 0.000  | 0.000 | Inf    | 0.993        | 1.144  | 0.284 | 4.608  | 0.850        |
| Varicose veins of lower extremities                                                | 1.061 | 0.801 | 1.405  | 0.680        | 1.626  | 1.020 | 2.592  | <b>0.041</b> | 1.349  | 0.925 | 1.967  | 0.120        |
| Hemorrhoids                                                                        | 1.169 | 0.920 | 1.486  | 0.200        | 0.883  | 0.521 | 1.498  | 0.645        | 1.217  | 0.857 | 1.730  | 0.273        |
| Oesophageal varices                                                                | 1.659 | 0.740 | 3.723  | 0.219        | 3.362  | 1.050 | 10.766 | <b>0.041</b> | 0.539  | 0.075 | 3.850  | 0.538        |
| Varicose veins of other sites                                                      | 2.223 | 1.053 | 4.692  | <b>0.036</b> | 3.965  | 1.255 | 12.528 | <b>0.019</b> | 0.683  | 0.096 | 4.868  | 0.703        |
| Other disorders of veins                                                           | 1.255 | 0.670 | 2.350  | 0.478        | 1.054  | 0.261 | 4.266  | 0.941        | 1.697  | 0.796 | 3.616  | 0.171        |
| Nonspecific lymphadenitis                                                          | 4.171 | 0.583 | 29.851 | 0.155        | 0.000  | 0.000 | Inf    | 0.992        | 10.446 | 1.445 | 75.523 | <b>0.020</b> |
| Other non-infective disorders of lymphatic vessels and lymph nodes                 | 1.792 | 1.087 | 2.953  | <b>0.022</b> | 2.748  | 1.205 | 6.267  | <b>0.016</b> | 1.147  | 0.472 | 2.791  | 0.762        |
| Postprocedural disorders of circulatory system, not elsewhere classified           | 0.611 | 0.086 | 4.355  | 0.623        | 2.442  | 0.339 | 17.589 | 0.375        | 1.231  | 0.172 | 8.822  | 0.836        |
| Other disorders of circulatory system in diseases classified elsewhere             | 1.736 | 0.647 | 4.656  | 0.274        | 1.743  | 0.241 | 12.598 | 0.582        | 0.816  | 0.114 | 5.836  | 0.839        |
| Other and unspecified disorders of circulatory system                              | 0.725 | 0.233 | 2.258  | 0.579        | 1.066  | 0.149 | 7.654  | 0.949        | 1.060  | 0.263 | 4.271  | 0.935        |

Abbreviations: ACD, All-cause dementia, AD, Alzheimer's disease; VaD, Vascular Dementia; HR, Hazard Ratios; 95% CI, 95% confidential interval; NA, not applicable

Multi-adjusted: Adjusted for Age, Sex, Education, Ethnicity, Body-Mass-Index, Metabolic equivalent of task-min/week, Smoking Status, Alcohol Intake, Townsend deprivation index at recruitment, Hypertension, Diabetes Mellitus, Hypercholesterolemia, Blood pressure-lowering medication, Cholesterol-Lowering Medication, Insulin, *ApoE4*, Pacemaker.

## Appendix

## Appendix 1 - Framingham General Cardiovascular Risk Score Calculation

## Appendix 1.1 Framingham General Cardiovascular Risk Score (FGCRS) Calculating for Female

| Points          | Age (years) | HDL (mmol/L) | TC (mmol/L) | SBP Not Treated | SBP Treated | Smoker | Diabetes |       |
|-----------------|-------------|--------------|-------------|-----------------|-------------|--------|----------|-------|
|                 |             |              |             | (mm Hg)         |             |        |          |       |
| -3              |             |              |             | <120            |             |        |          |       |
| -2              |             | >1.6         |             |                 |             |        |          |       |
| -1              |             | 1.3-.16      |             |                 | <120        |        |          |       |
| 0               | 30-34       | 1.2-1.29     | <4.1        | 120-129         |             | No     | No       |       |
| 1               |             | 0.9-.1.19    | 4.1-5.19    | 130-139         |             |        |          |       |
| 2               | 35-39       | <0.9         |             |                 | 120-129     |        |          |       |
| 3               |             |              | 5.2-6.19    |                 | 130-139     | Yes    |          |       |
| 4               | 40-44       |              | 6.2-7.2     | 140-150         |             |        | Yes      |       |
| 5               | 45-49       |              | >7.2        | 150-159         | 140-150     |        |          |       |
| 6               |             |              |             | 160+            | 150-159     |        |          |       |
| 7               | 50-54       |              |             |                 | 160+        |        |          |       |
| 8               | 55-59       |              |             |                 |             |        |          |       |
| 9               | 60-64       |              |             |                 |             |        |          |       |
| 10              | 65-69       |              |             |                 |             |        |          |       |
| 11              | 70-74       |              |             |                 |             |        |          |       |
| 12              | 75+         |              |             |                 |             |        |          |       |
| 13              |             |              |             |                 |             |        |          |       |
| 14              |             |              |             |                 |             |        |          |       |
| 15              |             |              |             |                 |             |        |          |       |
| Points allotted |             |              |             |                 |             |        |          | Total |

**Appendix 1.2 Framingham General Cardiovascular Risk Score (FGCRS) Calculating for Male**

|                        | Age (years) | HDL (mmol/L) | TC (mmol/L) | SBP Not Treated (mm Hg) | SBP Treated | Smoker | Diabetes |              |
|------------------------|-------------|--------------|-------------|-------------------------|-------------|--------|----------|--------------|
| <b>Points</b>          |             |              |             |                         |             |        |          |              |
| -3                     |             |              |             |                         |             |        |          |              |
| -2                     |             | >1.6         |             | <120                    |             |        |          |              |
| -1                     |             | 1.3-.16      |             |                         |             |        |          |              |
| 0                      | 30-34       | 1.2-1.29     | <4.1        | 120-129                 | <120        | No     | No       |              |
| 1                      |             | 0.9-.1.19    | 4.1-5.19    | 130-139                 |             |        |          |              |
| 2                      | 35-39       | <0.9         | 5.2-6.19    | 140-159                 | 120-129     |        |          |              |
| 3                      |             |              | 6.2-7.2     | 160+                    | 130-139     |        | Yes      |              |
| 4                      |             |              | >7.2        |                         | 140-159     | Yes    |          |              |
| 5                      | 40-44       |              |             |                         | 160+        |        |          |              |
| 6                      | 45-49       |              |             |                         |             |        |          |              |
| 7                      |             |              |             |                         |             |        |          |              |
| 8                      | 50-54       |              |             |                         |             |        |          |              |
| 9                      |             |              |             |                         |             |        |          |              |
| 10                     | 55-59       |              |             |                         |             |        |          |              |
| 11                     | 60-64       |              |             |                         |             |        |          |              |
| 12                     | 65-69       |              |             |                         |             |        |          |              |
| 13                     |             |              |             |                         |             |        |          |              |
| 14                     | 70-74       |              |             |                         |             |        |          |              |
| 15                     | 75+         |              |             |                         |             |        |          |              |
| <i>Points allotted</i> |             |              |             |                         |             |        |          | <i>Total</i> |

**Appendix 2 - Predication of 10-year Cardiovascular Disease Risk****Appendix 2.1 Predication of 10-year Cardiovascular Disease Risk and Risk Stratification for Female**

| Total Points | Female 10-Year Cardiovascular Diseases Risk (%) | Risk Level   |
|--------------|-------------------------------------------------|--------------|
| -3           | <1                                              | Low          |
| -2           | <1                                              |              |
| -1           | 1                                               |              |
| 0            | 1.2                                             |              |
| 1            | 1.5                                             |              |
| 2            | 1.7                                             |              |
| 3            | 2                                               |              |
| 4            | 2.4                                             |              |
| 5            | 2.8                                             |              |
| 6            | 3.3                                             |              |
| 7            | 3.9                                             |              |
| 8            | 4.5                                             |              |
| 9            | 5.3                                             |              |
| 10           | 6.3                                             |              |
| 11           | 7.3                                             |              |
| 12           | 8.6                                             |              |
| 13           | 10                                              | Intermediate |
| 14           | 11.7                                            |              |
| 15           | 13.7                                            |              |
| 16           | 15.9                                            |              |
| 17           | 18.51                                           |              |
| 18           | 21.5                                            | High         |
| 19           | 24.8                                            |              |
| 20           | 27.5                                            |              |
| 21+          | >30                                             |              |

**Appendix 2.2 Predication of 10-year Cardiovascular Disease Risk and Risk Stratification for Male**

| <b>Total Points</b> | <b>Male 10-Year Cardiovascular Diseases Risk (%)</b> | <b>Risk Level</b>   |
|---------------------|------------------------------------------------------|---------------------|
| -3                  | <1                                                   | <b>Low</b>          |
| -2                  | 1.1                                                  |                     |
| -1                  | 1.4                                                  |                     |
| 0                   | 1.6                                                  |                     |
| 1                   | 1.9                                                  |                     |
| 2                   | 2.3                                                  |                     |
| 3                   | 2.8                                                  |                     |
| 4                   | 3.3                                                  |                     |
| 5                   | 3.9                                                  |                     |
| 6                   | 4.7                                                  |                     |
| 7                   | 5.6                                                  | <b>Intermediate</b> |
| 8                   | 6.7                                                  |                     |
| 9                   | 7.9                                                  |                     |
| 10                  | 9.4                                                  |                     |
| 11                  | 11.2                                                 | <b>High</b>         |
| 12                  | 13.3                                                 |                     |
| 13                  | 15.6                                                 |                     |
| 14                  | 18.4                                                 |                     |
| 15                  | 21.6                                                 |                     |

**Appendix 3 – International Classification of Diseases Coding****Appendix 4 International Classification of Diseases Coding****ICD-Coding/ Cardiovascular Traits**

|                                                          |
|----------------------------------------------------------|
| I00 Rheumatic fever without mention of heart involvement |
| I01 Rheumatic fever with heart involvement               |
| I01.0 Acute rheumatic pericarditis                       |
| I01.1 Acute rheumatic endocarditis                       |
| I01.2 Acute rheumatic myocarditis                        |
| I01.8 Other acute rheumatic heart disease                |
| I01.9 Acute rheumatic heart disease, unspecified         |
| I02 Rheumatic chorea                                     |
| I02.0 Rheumatic chorea with heart involvement            |
| I02.9 Rheumatic chorea without heart involvement         |
| I05 Rheumatic mitral valve diseases                      |
| I05.0 Mitral stenosis                                    |
| I05.1 Rheumatic mitral insufficiency                     |
| I05.2 Mitral stenosis with insufficiency                 |
| I05.8 Other mitral valve diseases                        |
| I05.9 Mitral valve disease, unspecified                  |
| I06 Rheumatic aortic valve diseases                      |
| I06.0 Rheumatic aortic stenosis                          |
| I06.1 Rheumatic aortic insufficiency                     |
| I06.2 Rheumatic aortic stenosis with insufficiency       |
| I06.8 Other rheumatic aortic valve diseases              |
| I06.9 Rheumatic aortic valve disease, unspecified        |
| I07 Rheumatic tricuspid valve diseases                   |
| I07.0 Tricuspid stenosis                                 |
| I07.1 Tricuspid insufficiency                            |
| I07.2 Tricuspid stenosis with insufficiency              |
| I07.8 Other tricuspid valve diseases                     |

|                                                                                                   |
|---------------------------------------------------------------------------------------------------|
| I07.9 Tricuspid valve disease, unspecified                                                        |
| I08 Multiple valve diseases                                                                       |
| I08.0 Disorders of both mitral and aortic valves                                                  |
| I08.1 Disorders of both mitral and tricuspid valves                                               |
| I08.2 Disorders of both aortic and tricuspid valves                                               |
| I08.3 Combined disorders of mitral, aortic and tricuspid valves                                   |
| I08.8 Other multiple valve diseases                                                               |
| I08.9 Multiple valve disease, unspecified                                                         |
| I09 Other rheumatic heart diseases                                                                |
| I09.0 Rheumatic myocarditis                                                                       |
| I09.1 Rheumatic diseases of endocardium, valve unspecified                                        |
| I09.2 Chronic rheumatic pericarditis                                                              |
| I09.8 Other specified rheumatic heart diseases                                                    |
| I09.9 Rheumatic heart disease, unspecified                                                        |
| I10 Essential (primary) hypertension                                                              |
| I11 Hypertensive heart disease                                                                    |
| I11.0 Hypertensive heart disease with (congestive) heart failure                                  |
| I11.9 Hypertensive heart disease without (congestive) heart failure                               |
| I12 Hypertensive renal disease                                                                    |
| I12.0 Hypertensive renal disease with renal failure                                               |
| I12.9 Hypertensive renal disease without renal failure                                            |
| I13 Hypertensive heart and renal disease                                                          |
| I13.0 Hypertensive heart and renal disease with (congestive) heart failure                        |
| I13.1 Hypertensive heart and renal disease with renal failure                                     |
| I13.2 Hypertensive heart and renal disease with both (congestive) heart failure and renal failure |
| I13.9 Hypertensive heart and renal disease, unspecified                                           |
| I15 Secondary hypertension                                                                        |
| I15.0 Renovascular hypertension                                                                   |
| I15.1 Hypertension secondary to other renal disorders                                             |
| I15.2 Hypertension secondary to endocrine disorders                                               |
| I15.8 Other secondary hypertension                                                                |

|                                                                                                                              |
|------------------------------------------------------------------------------------------------------------------------------|
| I15.9 Secondary hypertension, unspecified                                                                                    |
| I20 Angina pectoris                                                                                                          |
| I20.0 Unstable angina                                                                                                        |
| I20.1 Angina pectoris with documented spasm                                                                                  |
| I20.8 Other forms of angina pectoris                                                                                         |
| I20.9 Angina pectoris, unspecified                                                                                           |
| I21 Acute myocardial infarction                                                                                              |
| I21.0 Acute transmural myocardial infarction of anterior wall                                                                |
| I21.1 Acute transmural myocardial infarction of inferior wall                                                                |
| I21.2 Acute transmural myocardial infarction of other sites                                                                  |
| I21.3 Acute transmural myocardial infarction of unspecified site                                                             |
| I21.4 Acute subendocardial myocardial infarction                                                                             |
| I21.9 Acute myocardial infarction, unspecified                                                                               |
| I21.X Presumed acute myocardial infarction (unconfirmed)                                                                     |
| I22 Subsequent myocardial infarction                                                                                         |
| I22.0 Subsequent myocardial infarction of anterior wall                                                                      |
| I22.1 Subsequent myocardial infarction of inferior wall                                                                      |
| I22.8 Subsequent myocardial infarction of other sites                                                                        |
| I22.9 Subsequent myocardial infarction of unspecified site                                                                   |
| I23 Certain current complications following acute myocardial infarction                                                      |
| I23.0 Hemopericardium as current complication following acute myocardial infarction                                          |
| I23.1 Atrial septal defect as current complication following acute myocardial infarction                                     |
| I23.2 Ventricular septal defect as current complication following acute myocardial infarction                                |
| I23.3 Rupture of cardiac wall without hemopericardium as current complication following acute myocardial infarction          |
| I23.4 Rupture of chordae tendineae as current complication following acute myocardial infarction                             |
| I23.5 Rupture of papillary muscle as current complication following acute myocardial infarction                              |
| I23.6 Thrombosis of atrium, auricular appendage and ventricle as current complications following acute myocardial infarction |
| I23.8 Other current complications following acute myocardial infarction                                                      |
| I24 Other acute ischemic heart diseases                                                                                      |
| I24.0 Coronary thrombosis not resulting in myocardial infarction                                                             |



|                                                                 |
|-----------------------------------------------------------------|
| I24.1 Dressler's syndrome                                       |
| I24.8 Other forms of acute ischemic heart disease               |
| I24.9 Acute ischemic heart disease, unspecified                 |
| I25 Chronic ischemic heart disease                              |
| I25.0 Atherosclerotic cardiovascular disease, so described      |
| I25.1 Atherosclerotic heart disease                             |
| I25.2 Old myocardial infarction                                 |
| I25.3 Aneurysm of heart                                         |
| I25.4 Coronary artery aneurysm                                  |
| I25.5 Ischemic cardiomyopathy                                   |
| I25.6 Silent myocardial ischemia                                |
| I25.8 Other forms of chronic ischemic heart disease             |
| I25.9 Chronic ischemic heart disease, unspecified               |
| I26 Pulmonary embolism                                          |
| I26.0 Pulmonary embolism with mention of acute cor pulmonale    |
| I26.9 Pulmonary embolism without mention of acute cor pulmonale |
| I27 Other pulmonary heart diseases                              |
| I27.0 Primary pulmonary hypertension                            |
| I27.1 Kyphoscoliosis heart disease                              |
| I27.2 Other secondary pulmonary hypertension                    |
| I27.8 Other specified pulmonary heart diseases                  |
| I27.9 Pulmonary heart disease, unspecified                      |
| I28 Other diseases of pulmonary vessels                         |
| I28.0 Arteriovenous fistula of pulmonary vessels                |
| I28.1 Aneurysm of pulmonary artery                              |
| I28.8 Other specified diseases of pulmonary vessels             |
| I28.9 Disease of pulmonary vessels, unspecified                 |
| I30 Acute pericarditis                                          |
| I30.0 Acute nonspecific idiopathic pericarditis                 |
| I30.1 Infective pericarditis                                    |
| I30.8 Other forms of acute pericarditis                         |

|                                                                                    |
|------------------------------------------------------------------------------------|
| I30.9 Acute pericarditis, unspecified                                              |
| I31 Other diseases of pericardium                                                  |
| I31.0 Chronic adhesive pericarditis                                                |
| I31.1 Chronic constrictive pericarditis                                            |
| I31.2 Hemopericardium, not elsewhere classified                                    |
| I31.3 Pericardial effusion (noninflammatory)                                       |
| I31.8 Other specified diseases of pericardium                                      |
| I31.9 Disease of pericardium, unspecified                                          |
| I32 Pericarditis in diseases classified elsewhere                                  |
| I32.0 Pericarditis in bacterial diseases classified elsewhere                      |
| I32.1 Pericarditis in other infectious and parasitic diseases classified elsewhere |
| I32.8 Pericarditis in other diseases classified elsewhere                          |
| I33 Acute and subacute endocarditis                                                |
| I33.0 Acute and subacute infective endocarditis                                    |
| I33.9 Acute endocarditis, unspecified                                              |
| I34 Nonrheumatic mitral valve disorders                                            |
| I34.0 Mitral (valve) insufficiency                                                 |
| I34.1 Mitral (valve) prolapse                                                      |
| I34.2 Nonrheumatic mitral (valve) stenosis                                         |
| I34.8 Other nonrheumatic mitral valve disorders                                    |
| I34.9 Nonrheumatic mitral valve disorder, unspecified                              |
| I35 Nonrheumatic aortic valve disorders                                            |
| I35.0 Aortic (valve) stenosis                                                      |
| I35.1 Aortic (valve) insufficiency                                                 |
| I35.2 Aortic (valve) stenosis with insufficiency                                   |
| I35.8 Other aortic valve disorders                                                 |
| I35.9 Aortic valve disorder, unspecified                                           |
| I36 Nonrheumatic tricuspid valve disorders                                         |
| I36.0 Nonrheumatic tricuspid (valve) stenosis                                      |
| I36.1 Nonrheumatic tricuspid (valve) insufficiency                                 |
| I36.2 Nonrheumatic tricuspid (valve) stenosis with insufficiency                   |

|                                                                                   |
|-----------------------------------------------------------------------------------|
| I36.8 Other nonrheumatic tricuspid valve disorders                                |
| I36.9 Nonrheumatic tricuspid valve disorder, unspecified                          |
| I37 Pulmonary valve disorders                                                     |
| I37.0 Pulmonary valve stenosis                                                    |
| I37.1 Pulmonary valve insufficiency                                               |
| I37.2 Pulmonary valve stenosis with insufficiency                                 |
| I37.8 Other pulmonary valve disorders                                             |
| I37.9 Pulmonary valve disorder, unspecified                                       |
| I38 Endocarditis, valve unspecified                                               |
| I39 Endocarditis and heart valve disorders in diseases classified elsewhere       |
| I39.0 Mitral valve disorders in diseases classified elsewhere                     |
| I39.1 Aortic valve disorders in diseases classified elsewhere                     |
| I39.2 Tricuspid valve disorders in diseases classified elsewhere                  |
| I39.3 Pulmonary valve disorders in diseases classified elsewhere                  |
| I39.4 Multiple valve disorders in diseases classified elsewhere                   |
| I39.8 Endocarditis, valve unspecified, in diseases classified elsewhere           |
| I40 Acute myocarditis                                                             |
| I40.0 Infective myocarditis                                                       |
| I40.1 Isolated myocarditis                                                        |
| I40.8 Other acute myocarditis                                                     |
| I40.9 Acute myocarditis, unspecified                                              |
| I41 Myocarditis in diseases classified elsewhere                                  |
| I41.0 Myocarditis in bacterial diseases classified elsewhere                      |
| I41.1 Myocarditis in viral diseases classified elsewhere                          |
| I41.2 Myocarditis in other infectious and parasitic diseases classified elsewhere |
| I41.8 Myocarditis in other diseases classified elsewhere                          |
| I42 Cardiomyopathy                                                                |
| I42.0 Dilated cardiomyopathy                                                      |
| I42.1 Obstructive hypertrophic cardiomyopathy                                     |
| I42.2 Other hypertrophic cardiomyopathy                                           |
| I42.3 Endomyocardial (eosinophilic) disease                                       |

|                                                                                |
|--------------------------------------------------------------------------------|
| I42.4 Endocardial fibroelastosis                                               |
| I42.5 Other restrictive cardiomyopathy                                         |
| I42.6 Alcoholic cardiomyopathy                                                 |
| I42.7 Cardiomyopathy due to drugs and other external agents                    |
| I42.8 Other cardiomyopathies                                                   |
| I42.9 Cardiomyopathy, unspecified                                              |
| I43 Cardiomyopathy in diseases classified elsewhere                            |
| I43.0 Cardiomyopathy in infectious and parasitic diseases classified elsewhere |
| I43.1 Cardiomyopathy in metabolic diseases                                     |
| I43.2 Cardiomyopathy in nutritional diseases                                   |
| I43.8 Cardiomyopathy in other diseases classified elsewhere                    |
| I44 Atrioventricular and left bundle-branch block                              |
| I44.0 Atrioventricular block, first degree                                     |
| I44.1 Atrioventricular block, second degree                                    |
| I44.2 Atrioventricular block, complete                                         |
| I44.3 Other and unspecified atrioventricular block                             |
| I44.4 Left anterior fascicular block                                           |
| I44.5 Left posterior fascicular block                                          |
| I44.6 Other and unspecified fascicular block                                   |
| I44.7 Left bundle-branch block, unspecified                                    |
| I45 Other conduction disorders                                                 |
| I45.0 Right fascicular block                                                   |
| I45.1 Other and unspecified right bundle-branch block                          |
| I45.2 Bifascicular block                                                       |
| I45.3 Trifascicular block                                                      |
| I45.4 Nonspecific intraventricular block                                       |
| I45.5 Other specified heart block                                              |
| I45.6 Preexcitation syndrome                                                   |
| I45.8 Other specified conduction disorders                                     |
| I45.9 Conduction disorder, unspecified                                         |
| I46 Cardiac arrest                                                             |

|                                                                 |
|-----------------------------------------------------------------|
| I46.0 Cardiac arrest with successful resuscitation              |
| I46.1 Sudden cardiac death, so described                        |
| I46.9 Cardiac arrest, unspecified                               |
| I47 Paroxysmal tachycardia                                      |
| I47.0 Reentry ventricular arrhythmia                            |
| I47.1 Supraventricular tachycardia                              |
| I47.2 Ventricular tachycardia                                   |
| I47.9 Paroxysmal tachycardia, unspecified                       |
| I48 Atrial fibrillation and flutter                             |
| I48.0 Paroxysmal atrial fibrillation                            |
| I48.1 Persistent atrial fibrillation                            |
| I48.2 Chronic atrial fibrillation                               |
| I48.3 Typical atrial flutter                                    |
| I48.4 Atypical atrial flutter                                   |
| I48.9 Atrial fibrillation and atrial flutter, unspecified       |
| I49 Other cardiac arrhythmias                                   |
| I49.0 Ventricular fibrillation and flutter                      |
| I49.1 Atrial premature depolarization                           |
| I49.2 Junctional premature depolarization                       |
| I49.3 Ventricular premature depolarization                      |
| I49.4 Other and unspecified premature depolarization            |
| I49.5 Sick sinus syndrome                                       |
| I49.8 Other specified cardiac arrhythmias                       |
| I49.9 Cardiac arrhythmia, unspecified                           |
| I50 Heart failure                                               |
| I50.0 Congestive heart failure                                  |
| I50.1 Left ventricular failure                                  |
| I50.9 Heart failure, unspecified                                |
| I51 Complications and ill-defined descriptions of heart disease |
| I51.0 Cardiac septal defect, acquired                           |
| I51.1 Rupture of chordae tendineae, not elsewhere classified    |

|                                                                                             |
|---------------------------------------------------------------------------------------------|
| I51.2 Rupture of papillary muscle, not elsewhere classified                                 |
| I51.3 Intracardiac thrombosis, not elsewhere classified                                     |
| I51.4 Myocarditis, unspecified                                                              |
| I51.5 Myocardial degeneration                                                               |
| I51.6 Cardiovascular disease, unspecified                                                   |
| I51.7 Cardiomegaly                                                                          |
| I51.8 Other ill-defined heart diseases                                                      |
| I51.9 Heart disease, unspecified                                                            |
| I52 Other heart disorders in diseases classified elsewhere                                  |
| I52.0 Other heart disorders in bacterial diseases classified elsewhere                      |
| I52.1 Other heart disorders in other infectious and parasitic diseases classified elsewhere |
| I52.8 Other heart disorders in other diseases classified elsewhere                          |
| I60 Subarachnoid hemorrhage                                                                 |
| I60.0 Subarachnoid hemorrhage from carotid siphon and bifurcation                           |
| I60.1 Subarachnoid hemorrhage from middle cerebral artery                                   |
| I60.2 Subarachnoid hemorrhage from anterior communicating artery                            |
| I60.3 Subarachnoid hemorrhage from posterior communicating artery                           |
| I60.4 Subarachnoid hemorrhage from basilar artery                                           |
| I60.5 Subarachnoid hemorrhage from vertebral artery                                         |
| I60.6 Subarachnoid hemorrhage from other intracranial arteries                              |
| I60.7 Subarachnoid hemorrhage from intracranial artery, unspecified                         |
| I60.8 Other subarachnoid hemorrhage                                                         |
| I60.9 Subarachnoid hemorrhage, unspecified                                                  |
| I61 Intracerebral hemorrhage                                                                |
| I61.0 Intracerebral hemorrhage in hemisphere, subcortical                                   |
| I61.1 Intracerebral hemorrhage in hemisphere, cortical                                      |
| I61.2 Intracerebral hemorrhage in hemisphere, unspecified                                   |
| I61.3 Intracerebral hemorrhage in brain stem                                                |
| I61.4 Intracerebral hemorrhage in cerebellum                                                |
| I61.5 Intracerebral hemorrhage, intraventricular                                            |
| I61.6 Intracerebral hemorrhage, multiple localized                                          |

|                                                                                            |
|--------------------------------------------------------------------------------------------|
| I61.8 Other intracerebral hemorrhage                                                       |
| I61.9 Intracerebral hemorrhage, unspecified                                                |
| I62 Other nontraumatic intracranial hemorrhage                                             |
| I62.0 Subdural hemorrhage (acute) (nontraumatic)                                           |
| I62.1 Nontraumatic extradural hemorrhage                                                   |
| I62.9 Intracranial hemorrhage (nontraumatic), unspecified                                  |
| I63 Cerebral infarction                                                                    |
| I63.0 Cerebral infarction due to thrombosis of precerebral arteries                        |
| I63.1 Cerebral infarction due to embolism of precerebral arteries                          |
| I63.2 Cerebral infarction due to unspecified occlusion or stenosis of precerebral arteries |
| I63.3 Cerebral infarction due to thrombosis of cerebral arteries                           |
| I63.4 Cerebral infarction due to embolism of cerebral arteries                             |
| I63.5 Cerebral infarction due to unspecified occlusion or stenosis of cerebral arteries    |
| I63.6 Cerebral infarction due to cerebral venous thrombosis, nonpyrogenic                  |
| I63.8 Other cerebral infarction                                                            |
| I63.9 Cerebral infarction, unspecified                                                     |
| I64 Stroke, not specified as hemorrhage or infarction                                      |
| I65 Occlusion and stenosis of precerebral arteries, not resulting in cerebral infarction   |
| I65.0 Occlusion and stenosis of vertebral artery                                           |
| I65.1 Occlusion and stenosis of basilar artery                                             |
| I65.2 Occlusion and stenosis of carotid artery                                             |
| I65.3 Occlusion and stenosis of multiple and bilateral precerebral arteries                |
| I65.8 Occlusion and stenosis of other precerebral artery                                   |
| I65.9 Occlusion and stenosis of unspecified precerebral artery                             |
| I66 Occlusion and stenosis of cerebral arteries, not resulting in cerebral infarction      |
| I66.0 Occlusion and stenosis of middle cerebral artery                                     |
| I66.1 Occlusion and stenosis of anterior cerebral artery                                   |
| I66.2 Occlusion and stenosis of posterior cerebral artery                                  |
| I66.3 Occlusion and stenosis of cerebellar arteries                                        |
| I66.4 Occlusion and stenosis of multiple and bilateral cerebral arteries                   |
| I66.8 Occlusion and stenosis of other cerebral artery                                      |

|                                                                                    |
|------------------------------------------------------------------------------------|
| I66.9 Occlusion and stenosis of unspecified cerebral artery                        |
| I67 Other cerebrovascular diseases                                                 |
| I67.0 Dissection of cerebral arteries, nonruptured                                 |
| I67.1 Cerebral aneurysm, nonruptured                                               |
| I67.2 Cerebral atherosclerosis                                                     |
| I67.3 Progressive vascular leukoencephalopathy                                     |
| I67.4 Hypertensive encephalopathy                                                  |
| I67.5 Moyamoya disease                                                             |
| I67.6 Nonpyrogenic thrombosis of intracranial venous system                        |
| I67.7 Cerebral arteritis, not elsewhere classified                                 |
| I67.8 Other specified cerebrovascular diseases                                     |
| I67.9 Cerebrovascular disease, unspecified                                         |
| I68 Cerebrovascular disorders in diseases classified elsewhere                     |
| I68.0 Cerebral amyloid angiopathy                                                  |
| I68.1 Cerebral arteritis in infectious and parasitic diseases classified elsewhere |
| I68.2 Cerebral arteritis in other diseases classified elsewhere                    |
| I68.8 Other cerebrovascular disorders in diseases classified elsewhere             |
| I69 Sequelae of cerebrovascular disease                                            |
| I69.0 Sequelae of subarachnoid hemorrhage                                          |
| I69.1 Sequelae of intracerebral hemorrhage                                         |
| I69.2 Sequelae of other nontraumatic intracranial hemorrhage                       |
| I69.3 Sequelae of cerebral infarction                                              |
| I69.4 Sequelae of stroke, not specified as hemorrhage or infarction                |
| I69.8 Sequelae of other and unspecified cerebrovascular diseases                   |
| I70 Atherosclerosis                                                                |
| I70.0 Atherosclerosis of aorta                                                     |
| I70.00 Atherosclerosis of aorta (without gangrene)                                 |
| I70.01 Atherosclerosis of aorta (with gangrene)                                    |
| I70.1 Atherosclerosis of renal artery                                              |
| I70.10 Atherosclerosis of renal artery (without gangrene)                          |
| I70.11 Atherosclerosis of renal artery (with gangrene)                             |



|                                                                       |
|-----------------------------------------------------------------------|
| I70.2 Atherosclerosis of arteries of the extremities                  |
| I70.20 Atherosclerosis of arteries of extremities (without gangrene)  |
| I70.21 Atherosclerosis of arteries of extremities (with gangrene)     |
| I70.8 Atherosclerosis of other arteries                               |
| I70.80 Atherosclerosis of other arteries (without gangrene)           |
| I70.81 Atherosclerosis of other arteries (with gangrene)              |
| I70.9 Generalized and unspecified atherosclerosis                     |
| I70.90 Generalized and unspecified atherosclerosis (without gangrene) |
| I70.91 Generalized and unspecified atherosclerosis (with gangrene)    |
| I71 Aortic aneurysm and dissection                                    |
| I71.0 Dissection of aorta [any part]                                  |
| I71.1 Thoracic aortic aneurysm, ruptured                              |
| I71.2 Thoracic aortic aneurysm, without mention of rupture            |
| I71.3 Abdominal aortic aneurysm, ruptured                             |
| I71.4 Abdominal aortic aneurysm, without mention of rupture           |
| I71.5 Thoracoabdominal aortic aneurysm, ruptured                      |
| I71.6 Thoracoabdominal aortic aneurysm, without mention of rupture    |
| I71.8 Aortic aneurysm of unspecified site, ruptured                   |
| I71.9 Aortic aneurysm of unspecified site, without mention of rupture |
| I72 Other aneurysm                                                    |
| I72.0 Aneurysm of carotid artery                                      |
| I72.1 Aneurysm of artery of upper extremity                           |
| I72.2 Aneurysm of renal artery                                        |
| I72.3 Aneurysm of iliac artery                                        |
| I72.4 Aneurysm of artery of lower extremity                           |
| I72.5 Aneurysm and dissection of other precerebral arteries           |
| I72.6 Aneurysm and dissection of vertebral artery                     |
| I72.8 Aneurysm of other specified arteries                            |
| I72.9 Aneurysm of unspecified site                                    |
| I73 Other peripheral vascular diseases                                |
| I73.0 Raynaud's syndrome                                              |

|                                                                                        |
|----------------------------------------------------------------------------------------|
| I73.1 Thromboangiitis obliterans [Buerger]                                             |
| I73.8 Other specified peripheral vascular diseases                                     |
| I73.9 Peripheral vascular disease, unspecified                                         |
| I74 Arterial embolism and thrombosis                                                   |
| I74.0 Embolism and thrombosis of abdominal aorta                                       |
| I74.1 Embolism and thrombosis of other and unspecified parts of aorta                  |
| I74.2 Embolism and thrombosis of arteries of the upper extremities                     |
| I74.3 Embolism and thrombosis of arteries of the lower extremities                     |
| I74.4 Embolism and thrombosis of arteries of extremities, unspecified                  |
| I74.5 Embolism and thrombosis of iliac artery                                          |
| I74.8 Embolism and thrombosis of other arteries                                        |
| I74.9 Embolism and thrombosis of unspecified artery                                    |
| I77 Other disorders of arteries and arterioles                                         |
| I77.0 Arteriovenous fistula, acquired                                                  |
| I77.1 Stricture of artery                                                              |
| I77.2 Rupture of artery                                                                |
| I77.3 Arterial fibromuscular dysplasia                                                 |
| I77.4 Coeliac artery compression syndrome                                              |
| I77.5 Necrosis of artery                                                               |
| I77.6 Arteritis, unspecified                                                           |
| I77.8 Other specified disorders of arteries and arterioles                             |
| I77.9 Disorder of arteries and arterioles, unspecified                                 |
| I78 Diseases of capillaries                                                            |
| I78.0 Hereditary hemorrhagic telangiectasia                                            |
| I78.1 Naevus, nonneoplastic                                                            |
| I78.8 Other diseases of capillaries                                                    |
| I78.9 Disease of capillaries, unspecified                                              |
| I79 Disorders of arteries, arterioles and capillaries in diseases classified elsewhere |
| I79.0 Aneurysm of aorta in diseases classified elsewhere                               |
| I79.1 Aortitis in diseases classified elsewhere                                        |
| I79.2 Peripheral angiopathy in diseases classified elsewhere                           |

|                                                                                                |
|------------------------------------------------------------------------------------------------|
| I79.8 Other disorders of arteries, arterioles and capillaries in diseases classified elsewhere |
| I80 Phlebitis and thrombophlebitis                                                             |
| I80.0 Phlebitis and thrombophlebitis of superficial vessels of lower extremities               |
| I80.1 Phlebitis and thrombophlebitis of femoral vein                                           |
| I80.2 Phlebitis and thrombophlebitis of other deep vessels of lower extremities                |
| I80.3 Phlebitis and thrombophlebitis of lower extremities, unspecified                         |
| I80.8 Phlebitis and thrombophlebitis of other sites                                            |
| I80.9 Phlebitis and thrombophlebitis of unspecified site                                       |
| I81 Portal vein thrombosis                                                                     |
| I82 Other venous embolism and thrombosis                                                       |
| I82.0 Budd-Chiari syndrome                                                                     |
| I82.1 Thrombophlebitis migraines                                                               |
| I82.2 Embolism and thrombosis of vena cava                                                     |
| I82.3 Embolism and thrombosis of renal vein                                                    |
| I82.8 Embolism and thrombosis of other specified veins                                         |
| I82.9 Embolism and thrombosis of unspecified vein                                              |
| I83 Varicose veins of lower extremities                                                        |
| I83.0 Varicose veins of lower extremities with ulcer                                           |
| I83.1 Varicose veins of lower extremities with inflammation                                    |
| I83.2 Varicose veins of lower extremities with both ulcer and inflammation                     |
| I83.9 Varicose veins of lower extremities without ulcer or inflammation                        |
| I84 Hemorrhoids                                                                                |
| I84.0 Internal thrombosed hemorrhoids                                                          |
| I84.1 Internal hemorrhoids with other complications                                            |
| I84.2 Internal hemorrhoids without complication                                                |
| I84.3 External thrombosed hemorrhoids                                                          |
| I84.4 External hemorrhoids with other complications                                            |
| I84.5 External hemorrhoids without complication                                                |
| I84.6 Residual hemorrhoidal skin tags                                                          |
| I84.7 Unspecified thrombosed hemorrhoids                                                       |
| I84.8 Unspecified hemorrhoids with other complications                                         |

|                                                                                    |
|------------------------------------------------------------------------------------|
| I84.9 Unspecified hemorrhoids without complication                                 |
| I85 Oesophageal varices                                                            |
| I85.0 Oesophageal varices with bleeding                                            |
| I85.9 Oesophageal varices without bleeding                                         |
| I86 Varicose veins of other sites                                                  |
| I86.0 Sublingual varices                                                           |
| I86.1 Scrotal varices                                                              |
| I86.2 Pelvic varices                                                               |
| I86.3 Vulval varices                                                               |
| I86.4 Gastric varices                                                              |
| I86.8 Varicose veins of other specified sites                                      |
| I87 Other disorders of veins                                                       |
| I87.0 Postphlebitic syndrome                                                       |
| I87.1 Compression of vein                                                          |
| I87.2 Venous insufficiency (chronic) (peripheral)                                  |
| I87.8 Other specified disorders of veins                                           |
| I87.9 Disorder of vein, unspecified                                                |
| I88 Nonspecific lymphadenitis                                                      |
| I88.0 Nonspecific mesenteric lymphadenitis                                         |
| I88.1 Chronic lymphadenitis, except mesenteric                                     |
| I88.8 Other nonspecific lymphadenitis                                              |
| I88.9 Nonspecific lymphadenitis, unspecified                                       |
| I89 Other non-infective disorders of lymphatic vessels and lymph nodes             |
| I89.0 Lymphoedema, not elsewhere classified                                        |
| I89.1 Lymphangitis                                                                 |
| I89.8 Other specified non-infective disorders of lymphatic vessels and lymph nodes |
| I89.9 Non-infective disorder of lymphatic vessels and lymph nodes, unspecified     |
| I95 Hypotension                                                                    |
| I95.0 Idiopathic hypotension                                                       |
| I95.1 Orthostatic hypotension                                                      |
| I95.2 Hypotension due to drugs                                                     |

|                                                                                                |
|------------------------------------------------------------------------------------------------|
| I95.8 Other hypotension                                                                        |
| I95.9 Hypotension, unspecified                                                                 |
| I97 Postprocedural disorders of circulatory system, not elsewhere classified                   |
| I97.0 Postcardiotomy syndrome                                                                  |
| I97.1 Other functional disturbances following cardiac surgery                                  |
| I97.2 Postmastectomy lymphoedema syndrome                                                      |
| I97.8 Other postprocedural disorders of circulatory system, not elsewhere classified           |
| I97.9 Postprocedural disorder of circulatory system, unspecified                               |
| I98 Other disorders of circulatory system in diseases classified elsewhere                     |
| I98.0 Cardiovascular syphilis                                                                  |
| I98.1 Cardiovascular disorders in other infectious and parasitic diseases classified elsewhere |
| I98.2 Oesophageal varices in diseases classified elsewhere                                     |
| I98.3 Oesophageal varices with bleeding in diseases classified elsewhere                       |
| I98.8 Other specified disorders of circulatory system in diseases classified elsewhere         |
| I99 Other and unspecified disorders of circulatory system                                      |

**Appendix 4 - Field ID of Covariates in UK Biobank****Appendix 3 Field ID of Covariates in UK Biobank**

| <b>Field ID</b> | <b>Description</b>                                   |
|-----------------|------------------------------------------------------|
| 21022           | Age                                                  |
| 31              | Gender                                               |
| 21000           | Ethnicity                                            |
| 189             | Townsend deprivation index at recruitment            |
| 23104           | Body mass index (BMI)                                |
| 20116           | Smoking status                                       |
| 1558            | Alcohol intake                                       |
| 22040           | Summed MET minutes per week for all activity         |
| 2443            | Diabetes                                             |
| 41270           | History of Stroke                                    |
| 6177            | Medication for cholesterol, blood pressure, diabetes |
| 4080            | Systolic blood pressure, automated reading           |
| 93              | Systolic blood pressure, manual reading              |
| 4079            | Diastolic blood pressure, automated reading          |
| 94              | Diastolic blood pressure, manual reading             |
| 95              | Pulse rate (during blood-pressure measurement)       |
| 102             | Pulse rate, automated reading                        |
| 4079            | Diastolic blood pressure, automated reading          |
| 94              | Diastolic blood pressure, manual reading             |
| 95              | Pulse rate (during blood-pressure measurement)       |
| 102             | Pulse rate, automated reading                        |
| 3079            | Pace-maker                                           |
| 23400           | Total Cholesterol                                    |
| 23406           | HDL Cholesterol                                      |

### Appendix 5 - UK biobank codes for dementia diagnosis and classification

Dementia diagnoses were collected from electronic health records, hospital admissions data and death register data from NHS Digital. All-cause dementia was diagnosed according to the International Classification of Diseases ICD-9 codes (290, 291.2, 294.1, 331.0-331.2, 331.5, 331.0 and 290.4) and ICD-10 codes (A81.0, F00, F01, F02, F03, F05.1, F10.6, G31.0, G31.1, and G31.8), if any of the above codes presented a primary or secondary diagnosis in the health records, or presented as a potential cause of death in the death register. AD was defined as code 331.0 in ICD-9 and codes F00 and G30 in ICD-10; VaD was defined as codes 290.4 in ICD-9 and codes F01 and I67.3 in ICD-10. In addition, dementia diagnoses were also retrieved from primary care data using Read codes (version 2 [Read v2] and version 3 [CTV3 or Read v3]).

#### Algorithmically-defined health outcomes

To aid researchers, UK Biobank have generated algorithmically-defined health outcomes using the self-reported health information, hospital inpatient data and death data, providing information on first diagnosis, for each participant, of a small number of health conditions.

#### First occurrences of medical conditions

A set of 'first occurrence' data-fields have been generated that map the clinical codes from primary care, hospital inpatient admissions, death records and self-reported medical conditions to 3-character ICD-10 codes and provide, for each participant, the date that code first occurred in any source.

#### Death data

Linkage to national death registries provides notifications of participant deaths (if in the UK), containing data on date and cause(s) of death. These are coded using ICD-10.

#### Hospital inpatient data

Hospital inpatient data are available for the full cohort. This provides information on hospital admissions for each participant and includes data on date of admission, diagnosis (and underlying conditions) during admission, procedures and discharge information. These are coded using ICD-9, ICD-10, OPCS-3 and OPCS-4.

#### Primary care data

Primary care data for ~230,000 UK Biobank participants (up to 2016 or 2017 depending on the data supplier) was made available in 2019. This dataset contains data from the GP system suppliers and contains coded clinical events (including consultations, diagnoses, procedures and laboratory tests), prescribed medications (including prescription date, drug code and, where available, drug name and quantity) and a range of administrative codes (e.g. referrals to specialist hospital clinics). The data are coded using READ2, CTV-3, BNF and DM+D.

| Diagnosis | Code Type | Codes                                                                                                                                                                                                                |
|-----------|-----------|----------------------------------------------------------------------------------------------------------------------------------------------------------------------------------------------------------------------|
| ACD       | ICD-9     | 290.2, 290.3, 290.4, 291.2, 294.1, 331.0, 331.1, 331.2, 331.5                                                                                                                                                        |
|           | ICD-10    | A81.0, F00, F00.0, F00.1, F00.2, F00.9, F01, F01.0, F01.1, F01.2, F01.3, F01.8, F01.9, F02, F02.0, F02.1, F02.2, F02.3, F02.4, F02.8, F03, F05.1, F10.6, G30, G30.0, G30.1, G30.8, G30.9, G31.0, G31.1, G31.8, I67.3 |

|     |           |                                                                                                                                                                                                                                                                                                                                                                                                                                                                                                                                                                                                                                                                                                                                                                                                                                                                                                                                                                                                                                                                                                                                                                                                                                                                                                                                                                                     |
|-----|-----------|-------------------------------------------------------------------------------------------------------------------------------------------------------------------------------------------------------------------------------------------------------------------------------------------------------------------------------------------------------------------------------------------------------------------------------------------------------------------------------------------------------------------------------------------------------------------------------------------------------------------------------------------------------------------------------------------------------------------------------------------------------------------------------------------------------------------------------------------------------------------------------------------------------------------------------------------------------------------------------------------------------------------------------------------------------------------------------------------------------------------------------------------------------------------------------------------------------------------------------------------------------------------------------------------------------------------------------------------------------------------------------------|
|     | Read V2   | 1461, A411., A4110, E00., E000., E001., E0010, E0011, E0012, E0013, E001z, E002., E0020, E0021, E002z, E003., E004., E0040, E0041, E0042, E0043, E004z, E012., E02y1, E041., Eu00., Eu000, Eu001, Eu002, Eu00z, Eu01., Eu010, Eu011, Eu012, Eu013, Eu01y, Eu01z, Eu02., Eu020, Eu021, Eu022, Eu023, Eu024, Eu025, Eu02y, Eu02z, Eu041, Eu106, Eu107, F110., F1100, F1101, F111., F112., F116., F118., F11x2, F11x7, F11x9, F11y2, F21y2, Fyu30, 38C13, 3AE3., 3AE4., 3AE5., 3AE6., 66h., 6AB., 8BM02, 8BM50, 8BM60, 8BPa., 8CMe0, 8CMG2, 8CMZ., 8CMZ0, 8CMZ1, 8CMZ2, 8CMZ3, 8CSA., 8Hla., 8IAe0, 8IAe2, 9hD., 9hD0., 9hD1., 9Ou., 9Ou1., 9Ou2., 9Ou3., 9Ou4., 9Ou5.                                                                                                                                                                                                                                                                                                                                                                                                                                                                                                                                                                                                                                                                                                                 |
|     | Read CTV3 | .1461, 1461, .E11., .E111, .E112, .E113, .E114, .E115, .E116, .E11Z, .F21Z, .F371, .G78., A411., A4110, E00., E000., E001., E0010, E0011, E0012, E0013, E001z, E002., E0020, E0021, E002z, E003., E004., E0040, E0041, E0042, E0043, E004z, E012., E02y1, E041., Eu00., Eu000, Eu001, Eu002, Eu00z, Eu01., Eu010, Eu011, Eu012, Eu013, Eu01y, Eu01z, Eu02., Eu020, Eu021, Eu022, Eu023, Eu024, Eu025, Eu02y, Eu02z, Eu041, F110., F1100, F1101, F111., F112., F116., F118., F11x2, F11x7, F11y2, F21y2, Fyu30, Ub1T6, X002m, X002w, X002x, X002y, X002z, X0030, X0031, X0032, X0033, X0034, X0035, X0036, X0037, X0039, X003A, X003B, X003C, X003D, X003E, X003F, X003G, X003H, X003I, X003J, X003l, X003m, X003P, X003R, X003T, X003V, X003W, X003X, X00R2, X00Rk, Xa0IH, Xa0sC, Xa0sE, Xa1GB, Xa25J, Xa3ez, XaA1S, XabVp, XaE74, XaIKB, XaIKC, XaKyY, XaOfZ, XE17j, XE1aG, XE1Xs, XE1Xu, XE1Z6, .3AE3, .3AE4, .3AE5, .3AE6, .66h., .6AB., .9hD1, .9Ou., .9Ou1, .9Ou2, .9Ou3, .9Ou4, .9Ou5, 3AE3., 3AE4., 3AE5., 3AE6., 66h., 6AB., 8BM02, 8BM50, 8BPa., 8CMe0, 8CMG2, 8CMZ., 8CMZ0, 8CMZ1, 8CMZ2, 8CMZ3, 8CSA., 8IAe0, 8IAe2, 9hD1., 9Ou., 9Ou1., 9Ou2., 9Ou3., 9Ou4., 9Ou5., Xa0fZ, XaaBZ, XaaeA, XaaiW, Xabd2, Xabd3, XabEk, XabEl, XabtQ, XacIx, XacIy, XacIz, XacJ0, XacLx, Xacly, Xaclz, XacM2, Xaefu, XaJBQ, XaJBU, XaJBV, XaJBW, XaJBX, XaJPy, XaLFf, XaLFo, XaLFp, XaMFy, |
| AD  | ICD-9     | 331.0                                                                                                                                                                                                                                                                                                                                                                                                                                                                                                                                                                                                                                                                                                                                                                                                                                                                                                                                                                                                                                                                                                                                                                                                                                                                                                                                                                               |
|     | ICD-10    | F00, F00.0, F00.1, F00.2, F00.9, G30, G30.0, G30.1, G30.8, G30.9<br>Read V2                                                                                                                                                                                                                                                                                                                                                                                                                                                                                                                                                                                                                                                                                                                                                                                                                                                                                                                                                                                                                                                                                                                                                                                                                                                                                                         |
|     | Read V2   | Eu00., Eu000, Eu001, Eu002, Eu00z, F110., F1100, F1101, Fyu30                                                                                                                                                                                                                                                                                                                                                                                                                                                                                                                                                                                                                                                                                                                                                                                                                                                                                                                                                                                                                                                                                                                                                                                                                                                                                                                       |
|     | Read CTV3 | F21Z, Eu00., Eu000, Eu001, Eu002, Eu00z, F110., F1100, F1101, Fyu30, X002x, X002y, X002z, X0030, X0031, X0032, X0033, X003G, XaIKB, XaIKC, XE17j                                                                                                                                                                                                                                                                                                                                                                                                                                                                                                                                                                                                                                                                                                                                                                                                                                                                                                                                                                                                                                                                                                                                                                                                                                    |
| VaD | ICD-9     | 290.4                                                                                                                                                                                                                                                                                                                                                                                                                                                                                                                                                                                                                                                                                                                                                                                                                                                                                                                                                                                                                                                                                                                                                                                                                                                                                                                                                                               |
|     | ICD-10    | F01, F01.0, F01.1, F01.2, F01.3, F01.8, F01.9, I67.3                                                                                                                                                                                                                                                                                                                                                                                                                                                                                                                                                                                                                                                                                                                                                                                                                                                                                                                                                                                                                                                                                                                                                                                                                                                                                                                                |



|  |           |                                                                                                                                                                        |
|--|-----------|------------------------------------------------------------------------------------------------------------------------------------------------------------------------|
|  | Read V2   | E004., E0040, E0041, E0042, E0043, E004z, E012., Eu01., Eu010, Eu011, Eu012, Eu013, Eu01y, Eu01z, F11x2, F21y2                                                         |
|  | Read CTV3 | .E115, .E116, .G78., E004., E0040, E0041, E0042, E0043, E004z, Eu01., Eu010, Eu011, Eu012, Eu013, Eu01y, Eu01z, F11x2, F21y2, X003R, X003T, X003V, X003W, Xa0IH, XE1Xs |

Abbreviations: ACD, All-cause dementia; AD, Alzheimer's disease, VaD, Vascular dementia; ICD, International Classification of Diseases; Read V2, Read codes version 2; Read CTV3, Read codes version 3.
